# Supplementary material for: Rapid Determination of the Freshness of Lotus Seeds Using Surface Desorption Atmospheric Pressure Chemical Ionization-Mass Spectrometry with Multivariate Analyses
Source: Hindawi journal article supplement (doi:10.1155/2019/1628796), 2019-08-18
Supplement: f1 [file 1628796.f1.xls]

## Sheet: stored for 3 years
1												2												3												4												5
SPECTRUM - MS		SPECTRUM - MS		SPECTRUM - MS		SPECTRUM - MS		SPECTRUM - MS		SPECTRUM - MS		SPECTRUM - MS		SPECTRUM - MS		SPECTRUM - MS		SPECTRUM - MS		SPECTRUM - MS		SPECTRUM - MS		SPECTRUM - MS		SPECTRUM - MS		SPECTRUM - MS		SPECTRUM - MS		SPECTRUM - MS		SPECTRUM - MS		SPECTRUM - MS		SPECTRUM - MS		SPECTRUM - MS		SPECTRUM - MS		SPECTRUM - MS		SPECTRUM - MS		SPECTRUM - MS
dapci-lotus seeds_2009-1.raw		dapci-lotus seeds_2009-1.raw		dapci-lotus seeds_2009-1.raw		dapci-lotus seeds_2009-1.raw		dapci-lotus seeds_2009-1.raw		dapci-lotus seeds_2009-1.raw		dapci-lotus seeds_2009-2.raw		dapci-lotus seeds_2009-2.raw		dapci-lotus seeds_2009-2.raw		dapci-lotus seeds_2009-2.raw		dapci-lotus seeds_2009-2.raw		dapci-lotus seeds_2009-2.raw		dapci-lotus seeds_2009-2.raw		dapci-lotus seeds_2009-2.raw		dapci-lotus seeds_2009-2.raw		dapci-lotus seeds_2009-2.raw		dapci-lotus seeds_2009-2.raw		dapci-lotus seeds_2009-2.raw		dapci-lotus seeds_2009-4.raw		dapci-lotus seeds_2009-4.raw		dapci-lotus seeds_2009-4.raw		dapci-lotus seeds_2009-4.raw		dapci-lotus seeds_2009-4.raw		dapci-lotus seeds_2009-4.raw		dapci-lotus seeds_2009-5.raw
ITMS + c ESI Full ms [65.05-500.00]		ITMS + c ESI Full ms [65.05-500.00]		ITMS + c ESI Full ms [65.05-500.00]		ITMS + c ESI Full ms [65.05-500.00]		ITMS + c ESI Full ms [65.05-500.00]		ITMS + c ESI Full ms [65.05-500.00]		ITMS + c ESI Full ms [65.05-500.00]		ITMS + c ESI Full ms [65.05-500.00]		ITMS + c ESI Full ms [65.05-500.00]		ITMS + c ESI Full ms [65.05-500.00]		ITMS + c ESI Full ms [65.05-500.00]		ITMS + c ESI Full ms [65.05-500.00]		ITMS + c ESI Full ms [65.05-500.00]		ITMS + c ESI Full ms [65.05-500.00]		ITMS + c ESI Full ms [65.05-500.00]		ITMS + c ESI Full ms [65.05-500.00]		ITMS + c ESI Full ms [65.05-500.00]		ITMS + c ESI Full ms [65.05-500.00]		ITMS + c ESI Full ms [65.05-500.00]		ITMS + c ESI Full ms [65.05-500.00]		ITMS + c ESI Full ms [65.05-500.00]		ITMS + c ESI Full ms [65.05-500.00]		ITMS + c ESI Full ms [65.05-500.00]		ITMS + c ESI Full ms [65.05-500.00]		ITMS + c ESI Full ms [65.05-500.00]
Scan #: 333-335		Scan #: 454		Scan #: 451-457		Scan #: 416-418		Scan #: 542-544		Scan #: 616-620		Scan #: 494-500		Scan #: 496-503		Scan #: 485-491		Scan #: 634-642		Scan #: 498-505		Scan #: 752-757		Scan #: 633-640		Scan #: 485-493		Scan #: 494-501		Scan #: 538-545		Scan #: 491		Scan #: 752-756		Scan #: 1045-1050		Scan #: 1046-1054		Scan #: 840-845		Scan #: 744-747		Scan #: 562		Scan #: 745-750		Scan #: 416-420
RT: 1.55-1.56		RT: 2.12		RT: 2.10-2.13		RT: 1.94-1.95		RT: 2.53-2.54		RT: 2.88-2.89		RT: 2.31-2.33		RT: 2.32-2.35		RT: 2.26-2.29		RT: 2.96-3.00		RT: 2.33-2.36		RT: 3.52-3.54		RT: 2.96-2.99		RT: 2.26-2.30		RT: 2.31-2.34		RT: 2.51-2.55		RT: 2.29		RT: 3.52-3.54		RT: 4.89-4.92		RT: 4.90-4.94		RT: 3.93-3.95		RT: 3.48-3.49		RT: 2.62		RT: 3.48-3.51		RT: 1.94-1.96
AV: 3		SB: 47 0.66-0.70 , 3.04-3.21		AV: 7		AV: 3		AV: 3		AV: 5		AV: 7		AV: 8		AV: 7		AV: 9		AV: 8		AV: 6		AV: 8		AV: 9		AV: 8		AV: 8		SB: 100 1.14-1.55 , 5.04-5.09		AV: 5		AV: 6		AV: 9		AV: 6		AV: 4		SB: 107 0.39-0.82 , 5.07-5.13		AV: 6		AV: 5
SB: 63 3.03-3.22 , 0.02-0.11		Mass defect: 0.00 @ 1.00, 300.00 @ 1000.00		SB: 47 0.66-0.70 , 3.04-3.21		SB: 47 0.66-0.70 , 3.04-3.21		SB: 47 0.66-0.70 , 3.04-3.21		SB: 47 0.66-0.70 , 3.04-3.21		SB: 75 1.17-1.44 , 4.58-4.65		SB: 75 1.17-1.44 , 4.58-4.65		SB: 75 1.17-1.44 , 4.58-4.65		SB: 75 1.17-1.44 , 4.58-4.65		SB: 75 1.17-1.44 , 4.58-4.65		SB: 75 1.17-1.44 , 4.58-4.65		SB: 100 1.14-1.55 , 5.04-5.09		SB: 100 1.14-1.55 , 5.04-5.09		SB: 100 1.14-1.55 , 5.04-5.09		SB: 100 1.14-1.55 , 5.04-5.09		Mass defect: 0.00 @ 1.00, 300.00 @ 1000.00		SB: 100 1.14-1.55 , 5.04-5.09		SB: 107 0.39-0.82 , 5.07-5.13		SB: 107 0.39-0.82 , 5.07-5.13		SB: 107 0.39-0.82 , 5.07-5.13		SB: 107 0.39-0.82 , 5.07-5.13		Mass defect: 0.00 @ 1.00, 300.00 @ 1000.00		SB: 107 0.39-0.82 , 5.07-5.13		SB: 77 1.23-1.49 , 5.47-5.56
Mass defect: 0.00 @ 1.00, 300.00 @ 1000.00		Data points: 223		Mass defect: 0.00 @ 1.00, 300.00 @ 1000.00		Mass defect: 0.00 @ 1.00, 300.00 @ 1000.00		Mass defect: 0.00 @ 1.00, 300.00 @ 1000.00		Mass defect: 0.00 @ 1.00, 300.00 @ 1000.00		Mass defect: 0.00 @ 1.00, 300.00 @ 1000.00		Mass defect: 0.00 @ 1.00, 300.00 @ 1000.00		Mass defect: 0.00 @ 1.00, 300.00 @ 1000.00		Mass defect: 0.00 @ 1.00, 300.00 @ 1000.00		Mass defect: 0.00 @ 1.00, 300.00 @ 1000.00		Mass defect: 0.00 @ 1.00, 300.00 @ 1000.00		Mass defect: 0.00 @ 1.00, 300.00 @ 1000.00		Mass defect: 0.00 @ 1.00, 300.00 @ 1000.00		Mass defect: 0.00 @ 1.00, 300.00 @ 1000.00		Mass defect: 0.00 @ 1.00, 300.00 @ 1000.00		Data points: 228		Mass defect: 0.00 @ 1.00, 300.00 @ 1000.00		Mass defect: 0.00 @ 1.00, 300.00 @ 1000.00		Mass defect: 0.00 @ 1.00, 300.00 @ 1000.00		Mass defect: 0.00 @ 1.00, 300.00 @ 1000.00		Mass defect: 0.00 @ 1.00, 300.00 @ 1000.00		Data points: 196		Mass defect: 0.00 @ 1.00, 300.00 @ 1000.00		Mass defect: 0.00 @ 1.00, 300.00 @ 1000.00
Data points: 251		Mass	Intensity	Data points: 229		Data points: 222		Data points: 237		Data points: 231		Data points: 217		Data points: 230		Data points: 243		Data points: 182		Data points: 229		Data points: 227		Data points: 180		Data points: 244		Data points: 218		Data points: 235		Mass	Intensity	Data points: 225		Data points: 224		Data points: 224		Data points: 230		Data points: 227		Mass	Intensity	Data points: 241		Data points: 227
Mass	Intensity	70	2599	Mass	Intensity	Mass	Intensity	Mass	Intensity	Mass	Intensity	Mass	Intensity	Mass	Intensity	Mass	Intensity	Mass	Intensity	Mass	Intensity	Mass	Intensity	Mass	Intensity	Mass	Intensity	Mass	Intensity	Mass	Intensity	70	2414	Mass	Intensity	Mass	Intensity	Mass	Intensity	Mass	Intensity	Mass	Intensity	70	1184	Mass	Intensity	Mass	Intensity
70	1524	72	350	70	2008	70	1595	70	1491	70	1674	70	1824	70	1850	70	2260	70	2351	70	1661	68	12	70	2081	70	2202	70	1879	70	1584	74	19512	70	1487	70	1297	70	1234	70	2398	70	1365	76	66076	70	1652	70	2372
76	44058	74	3392	72	230	76	53679	74	18224	72	236	74	14144	74	13609	74	14087	74	698	74	13560	70	1510	76	38229	74	13110	74	13091	74	7238	75	1091	74	2954	76	53645	74	4668	72	110	72	113	77	3109	72	150	72	77
77	1481	76	61527	74	8278	77	4371	76	57423	74	5390	76	56742	76	58727	76	48714	76	38681	76	56455	74	4817	78	17375	76	50345	76	58364	76	53065	76	48493	76	59810	77	3541	76	47190	74	7587	74	10089	78	12083	74	7011	74	8250
78	13305	77	2319	76	56159	78	12904	77	5750	76	46348	77	1321	77	1040	77	183	78	19390	77	1218	76	58698	80	916	77	1188	77	1912	77	1297	77	3614	77	1132	78	12402	77	2331	76	56468	76	43485	80	3506	76	48047	76	59243
80	2047	78	16333	77	2610	80	3343	78	13695	77	2280	78	17974	78	18600	78	17343	80	1609	78	17162	77	353	91	28748	78	17604	78	18411	78	17415	78	14731	78	21757	80	2669	78	10828	77	2301	77	1137	91	54336	77	2847	77	3376
91	71323	80	3781	78	16494	91	131398	80	2974	78	16747	80	4126	80	4459	80	3874	91	42231	80	4254	78	20833	92	1221	80	3817	80	4164	80	2935	80	3259	80	3341	91	59263	80	2466	78	13155	78	8065	92	956	78	8654	78	21157
92	3277	91	152034	80	3301	92	7002	91	95627	80	2680	91	126445	91	151177	91	148866	92	1748	82	8	80	3289	96	3722	91	150161	91	138638	91	118194	91	228009	91	77822	92	3535	91	65974	80	2784	79	532	96	2289	79	16	79	1976
96	1778	92	8829	91	118587	100	433	92	4657	91	76085	92	5583	92	6335	92	6539	96	2532	90	2396	91	74112	100	129	92	6753	92	6122	92	5196	92	9955	92	3037	96	3510	92	3911	91	49663	80	3080	102	11004	80	2486	80	6497
100	511	102	20750	92	6186	102	9834	100	887	92	4274	96	1812	96	2016	96	3437	100	513	91	140804	92	2858	102	5004	96	4367	96	3305	96	4295	93	387	96	3866	102	9816	96	4762	92	2822	86	194	104	5608	91	82080	86	332
102	3745	104	4879	100	616	104	5737	102	41022	100	1141	100	1152	100	868	100	435	102	4423	92	6229	96	2533	104	2358	100	815	100	1480	100	938	96	3570	100	1799	104	5145	102	25432	96	3151	91	74570	106	3656	92	4333	91	13542
104	4404	106	2782	102	31886	106	2372	104	4236	102	15319	102	13132	102	8625	102	14426	104	2627	96	2235	100	1314	106	1097	102	11813	102	11663	102	10099	100	699	102	5255	106	2756	104	5474	100	47	92	3680	108	179157	93	638	92	511
106	3238	108	291573	104	5231	108	256880	106	3091	104	5032	104	4702	104	5512	104	5787	106	1336	100	617	102	6420	108	229257	104	5784	104	4890	104	5437	102	27102	104	4701	108	162073	106	2432	102	12660	96	5876	109	6260	96	4876	96	994
108	236521	109	10565	106	3111	109	9290	108	237569	106	3024	106	3244	106	3346	106	2785	108	251906	102	8311	104	4723	109	6352	106	2768	106	3196	106	2622	104	6459	106	2611	109	5247	108	145927	104	4303	102	40072	110	16949	102	24980	100	1280
109	8812	110	21951	108	277848	110	23675	109	9986	108	239844	108	263544	108	290773	108	276001	109	6964	104	5916	106	2486	110	29576	108	282092	108	280285	108	239416	106	3230	108	275973	110	18523	109	4429	106	3241	104	3829	112	9164	104	3785	102	23553
110	16735	112	15622	109	9261	112	14266	110	28868	109	8006	109	9797	109	11111	109	10784	110	30340	106	3364	108	258804	112	14896	109	11588	109	10600	109	8532	108	260356	109	9657	112	10996	110	16876	108	153479	106	2389	114	1311	106	2583	104	7708
112	17451	114	2500	110	25468	114	1483	112	15586	110	24586	110	27928	110	31732	110	26778	112	16846	108	274269	109	8911	118	5198	110	26846	110	29360	110	24413	109	9656	110	37746	114	734	112	9519	109	4692	108	137951	116	1362	108	140804	105	49
114	387	117	6142	112	15912	117	12477	114	822	112	18835	112	15010	112	15581	112	15293	114	18	109	10657	110	36817	124	15538	112	16024	112	15581	112	15061	110	25939	112	18630	116	95	114	662	110	26640	109	3996	118	7105	109	4397	106	3806
117	1511	118	9479	114	1825	118	8169	116	1036	114	1543	114	1127	114	1103	114	678	118	5669	110	30989	112	17345	132	4422	114	876	114	1040	114	1106	112	12089	114	693	117	3476	117	1494	112	10743	110	13536	123	263	110	16284	108	213743
118	8854	123	141	116	652	123	15	117	6387	117	4759	117	3186	117	4861	117	3837	124	17103	112	14961	114	711	135	229489	117	5740	117	5648	116	237	114	1314	117	1069	118	8470	118	7868	118	9406	112	7643	124	14068	112	9081	109	7076
124	13832	124	14433	117	1606	124	14864	118	10084	118	8342	118	8998	118	9595	118	8988	132	4655	114	1110	118	8569	136	5569	118	9401	118	9099	117	3798	117	23567	118	8677	120	185	123	1473	124	13350	114	751	126	240	114	253	110	34943
132	7641	132	6098	118	8629	126	261	124	14776	120	64	123	224	123	21	123	332	135	250516	117	5606	124	17770	138	2639	123	411	123	77	118	8237	118	11890	124	18474	123	1133	124	12081	132	8984	116	666	132	9558	116	1803	112	21776
135	237381	135	322608	124	17681	128	9	126	1055	124	18462	124	17389	124	18795	124	17550	136	7653	118	9628	132	8145	144	922	124	17606	124	17842	123	502	123	6378	132	8481	124	12086	126	625	135	227220	117	1388	135	215616	117	6138	114	1242
136	14529	136	25023	132	7565	132	8082	132	8810	132	9540	126	662	126	315	132	7246	138	3488	123	258	135	294534	152	2222208	132	7404	126	550	124	16422	124	15516	135	304874	126	762	132	7390	136	15710	118	6066	136	13246	118	7352	118	10108
138	6355	138	4663	135	303823	135	367685	135	271958	135	292865	132	8125	132	8259	135	337304	144	992	124	18610	136	15645	153	128205	135	342563	132	8054	132	7706	126	721	136	16536	132	8181	135	287483	138	2920	123	1547	138	1899	123	2128	124	23449
144	4112	144	5275	136	20634	136	26327	136	19304	136	19746	135	302160	135	343270	136	21426	152	2468214	126	18	138	3901	154	9768	136	22497	135	323652	135	320783	132	9837	138	4257	135	286483	136	20590	144	4331	124	11515	144	5425	124	12393	126	360
146	924	148	1902	138	3944	138	2567	138	2944	138	4014	136	17981	136	20903	138	4829	153	146273	132	7994	144	4147	156	1330	138	4492	136	19723	136	20455	135	491210	144	4267	136	19977	138	2696	146	1476	126	651	146	544	126	468	132	9676
148	2234	150	544	144	5244	144	3297	144	5659	144	5218	138	3253	138	3432	144	3729	154	12323	135	336787	146	1009	158	2975	144	4228	138	3409	138	3965	136	32535	146	784	138	2900	144	4778	148	1683	132	6175	148	817	132	6731	134	2977
150	588	152	2019747	146	2028	146	850	146	2739	146	656	144	4444	144	4908	146	1326	156	1572	136	21724	148	1024	160	3772	146	1357	144	4580	144	3475	138	5347	148	462	144	4666	146	213	150	497	135	283382	152	1267867	135	321757	135	209425
152	2059016	153	129055	148	2229	148	828	148	3966	148	4288	146	1672	146	1793	148	1967	158	2209	138	3550	150	515	162	4633	148	2040	146	1737	146	1203	144	2737	150	792	146	1148	148	2051	152	1274863	136	17357	153	66951	136	21452	136	12091
153	115943	154	11498	152	2054717	150	502	150	2244	150	1463	148	1697	148	2021	150	74	160	3928	144	4483	152	2186847	166	1951	150	404	148	1717	148	1948	146	2124	152	2376384	148	1406	152	1224748	153	64526	138	1613	154	6733	138	2376	138	6082
154	12074	156	5913	153	128108	152	2052437	152	1996755	152	2200645	150	344	150	595	152	2239267	162	4354	146	2152	153	127072	167	3579	152	2237943	150	503	150	1195	148	28	153	141055	152	1318040	153	60721	154	6797	144	3974	156	7406	144	4709	144	6027
156	5032	158	5478	154	12755	153	116306	153	104525	153	126298	152	2014398	152	2284642	153	133751	166	1956	148	2053	154	13247	168	1011	153	132625	152	2153442	152	2102925	150	403	154	14930	153	68881	154	5671	156	4776	148	472	158	6108	148	638	146	2661
158	2534	160	4766	156	4816	154	14019	154	12365	154	12411	153	123034	153	142566	154	13063	167	4242	150	275	156	5140	170	321	154	12659	153	132288	153	113550	152	2026732	156	4962	154	5920	156	3868	158	4613	152	1124820	160	5246	152	1321380	148	2645
160	5596	162	8054	158	9733	156	5315	156	7534	156	5711	154	11532	154	12669	156	7228	168	1036	152	2224823	158	3013	172	6979	156	7067	154	11991	154	10934	153	125738	158	2882	156	4695	158	9012	160	6781	153	59651	162	11284	153	71639	150	1710
162	6959	166	12485	160	5962	158	2368	158	9447	158	6128	156	7019	156	7537	158	3463	170	255	153	139823	160	5775	174	2032	158	3108	156	7141	156	5354	154	10292	160	5877	158	4470	160	5633	162	11053	154	4455	166	6546	154	6470	152	1959957
166	4652	167	12211	162	10081	160	5455	160	6979	160	5951	158	3508	158	2800	160	5706	172	8088	154	12910	162	7922	176	940	160	5681	158	3529	158	3871	156	10234	162	8863	160	6600	162	9253	166	7297	156	2701	167	5920	156	3522	153	108232
167	5720	168	1266	166	8096	162	10947	162	13741	162	10447	160	6404	160	6577	162	6407	174	2169	156	7175	166	4809	178	752	162	7127	160	6496	160	5407	158	7018	166	4108	162	9367	166	9905	167	10667	158	12840	168	909	158	8416	154	10841
168	1284	170	2003	167	11270	166	8953	166	7259	166	6896	162	8051	162	7712	166	7280	176	1121	158	2904	167	12000	180	2763	166	7110	162	8470	162	8826	160	5256	167	12117	166	5737	167	17783	168	1752	160	4653	170	3084	160	4973	156	4049
170	2323	172	13234	168	2187	167	16387	167	7321	167	10459	166	6685	166	7664	167	15443	178	855	160	6468	168	1888	186	15020	167	15880	166	6624	166	5562	162	8323	168	1562	167	17243	168	2568	170	2987	162	8183	172	10160	162	8419	158	10976
172	8856	174	4936	170	2582	168	2263	168	2057	168	1771	167	12375	167	15313	168	3040	180	3061	162	7601	170	2735	188	2633	168	2756	167	14046	167	16688	166	12854	170	2880	168	2319	170	2929	172	10860	166	7507	174	5091	166	6511	160	5990
174	3527	176	3653	172	11859	170	3234	170	3043	170	2610	168	2237	168	2649	170	3548	186	16561	166	7181	172	11520	190	3464	170	3866	168	2326	168	2171	167	24616	172	11713	170	3182	172	9710	174	4335	167	22312	176	1577	167	22696	162	6282
176	3723	177	1169	174	4371	172	8599	172	11224	172	10427	170	3241	170	3000	172	11646	188	3290	167	14457	174	3965	192	1343	172	12016	170	3357	170	1920	168	3684	174	3470	172	9805	174	4129	176	3114	168	2910	178	2310	168	2574	166	4664
177	559	178	3721	176	2980	174	4581	174	4683	174	4556	172	11838	172	13222	174	4514	190	3526	168	2560	176	2172	195	82737	174	4488	172	12450	172	10423	169	239	176	2409	174	4334	176	2444	177	4055	170	2277	180	2264	170	2561	167	6141
178	2488	180	4526	178	2767	176	2509	176	2290	176	3019	174	4382	174	4409	176	2548	192	1592	170	3412	177	515	196	9421	176	2728	174	4693	174	4231	170	2397	177	1717	176	2179	177	2834	178	3234	172	7165	186	14344	172	7538	168	1611
180	4585	184	287	180	5150	178	2029	178	2283	177	1131	176	2724	176	2906	177	2735	195	97508	172	13156	178	3281	202	1946	177	3689	176	2960	176	2065	172	12406	178	3294	177	1945	178	2339	180	3014	174	3364	188	4551	174	3357	170	2138
182	157	186	16013	182	229	180	3754	180	4059	178	3500	177	1086	177	1480	178	2833	196	9927	174	4649	180	4047	204	1434	178	3139	177	1843	178	2586	174	5112	180	4002	178	2411	180	3188	186	15362	176	1638	190	4416	176	1433	172	13511
186	15596	188	5271	186	17487	182	727	182	984	180	4698	178	3112	178	2988	180	4600	202	2011	176	2508	182	481	210	2035	180	4188	178	3050	180	3760	176	2083	182	528	180	3095	182	187	188	5296	177	1362	192	1263	177	2765	174	5656
188	5612	190	4766	188	4376	184	203	186	16418	182	250	180	4251	180	4519	182	250	204	1842	177	1789	186	19339	211	3206	182	236	180	4175	182	194	177	10278	186	19571	182	234	186	13307	190	6083	178	2226	195	172745	178	2738	176	2814
190	5580	192	2662	190	5388	186	10797	188	4946	186	16990	182	260	182	362	186	17644	210	2326	178	2716	188	4523	212	95798	184	9	182	373	186	15643	178	2830	188	4581	186	13362	188	4637	192	1999	180	4411	196	17949	180	3197	177	229
192	2108	193	129	192	2763	188	5188	190	5065	188	4823	184	238	184	378	188	4170	211	9579	180	4115	190	5672	213	6129	186	17559	184	114	188	4515	180	4806	190	5707	188	4861	190	4348	193	983	182	362	200	451	182	7	178	1265
195	177065	195	164235	193	378	190	3924	192	2136	190	5334	186	18617	186	18778	190	5749	212	99076	182	573	192	2447	214	39	188	4465	186	18781	190	4567	182	633	192	2464	190	4514	192	2775	195	130661	186	9928	202	1417	186	10571	180	5184
196	18889	196	14510	195	186376	192	1762	193	326	192	2515	188	5176	188	4970	192	2774	213	7388	184	410	193	356	216	1221	190	5801	188	5160	192	2540	186	16616	193	348	192	2608	193	749	196	14843	188	3466	204	2559	188	4025	182	171
198	5763	198	1125	196	18678	193	417	195	201161	193	1179	190	4953	190	5262	193	879	216	3956	186	18838	195	158013	222	725	192	2916	190	4999	193	67	188	4867	195	162899	193	436	195	149440	198	595	190	2851	208	556	190	3003	184	221
200	605	202	3746	200	345	195	152027	196	23830	195	159265	192	2812	192	2757	195	163254	222	862	188	5008	196	19092	223	4713	193	838	192	2766	195	153283	190	5279	196	20622	195	165107	196	18104	202	3304	192	1922	210	2468	192	1796	186	19001
202	3203	204	2628	202	3908	196	19854	197	381	196	17160	193	421	193	693	196	17598	223	8978	190	5199	202	3026	224	2444	195	164814	193	317	196	19836	192	4296	202	3077	196	19505	200	159	204	3892	193	248	212	139874	193	556	188	5423
204	3802	208	1311	204	3467	202	2829	198	467	200	781	195	167971	195	172799	198	887	224	3523	192	2753	204	3237	226	299	196	18388	195	174085	198	306	193	1553	204	3233	202	3123	202	3398	206	433	195	104248	213	9653	195	110178	190	4639
206	405	210	2221	208	627	204	1558	200	607	202	4155	196	16225	196	18122	200	410	226	358	193	971	208	581	228	4526	198	847	196	17547	202	2723	195	166554	208	334	204	3415	204	4264	208	650	196	13055	214	997	196	13996	192	2083
208	554	211	15340	210	2761	208	629	202	3768	204	4033	202	3086	202	3196	202	3199	228	4971	195	170250	210	2595	230	1537	200	217	202	3230	204	3066	196	19885	210	2283	208	709	208	673	210	1898	198	652	216	7712	198	100	193	268
210	1242	212	100236	211	9028	210	3068	203	315	206	349	204	2838	204	2873	204	3093	230	1942	196	18474	211	3091	231	328	202	3402	204	3100	208	613	200	830	211	2652	210	2005	210	2066	211	26820	200	350	218	1131	200	564	195	172177
211	30481	213	11292	212	111705	211	12983	204	4636	208	900	208	877	208	906	208	1011	231	862	202	3291	212	137067	232	5107	204	2869	208	788	210	2990	202	3719	212	145091	211	11724	211	15792	212	94130	202	2815	222	4030	202	2692	196	17215
212	93353	214	1319	213	9369	212	94587	206	50	210	3094	210	2966	210	2952	210	2816	232	5262	204	3034	213	13016	234	29577	208	912	210	2959	212	105884	204	1280	213	13723	212	109291	212	98060	213	11916	204	3354	223	594	204	3272	202	3256
213	8655	216	14899	214	1252	213	9496	208	1196	211	20635	211	8757	211	11869	212	132596	234	28574	208	908	214	1650	236	746	210	2859	211	9429	213	8262	208	886	214	1805	213	11859	213	11531	214	961	208	1010	224	1862	206	218	204	5522
214	1176	218	1044	216	14196	214	1864	210	2628	212	101399	212	107584	212	112545	213	9314	236	1183	210	2546	216	6045	238	663	212	128741	212	110669	214	1125	210	811	216	3395	214	1901	214	1350	216	10334	210	981	226	276	208	735	206	184
216	12722	222	2552	218	492	216	12646	211	24986	213	9562	213	9736	213	10570	214	1018	238	527	211	12950	218	1353	239	5440	213	10175	213	10141	216	4147	211	51750	218	1511	216	11979	216	11973	218	988	211	16597	227	37	210	1765	208	506
218	1143	223	24353	222	3687	218	705	212	88137	214	1407	214	1556	214	1314	216	9474	240	12408	212	109220	222	4444	240	11395	214	1416	214	1621	218	959	212	76748	222	4739	218	963	218	521	222	2194	212	76555	228	6041	211	5103	210	2772
222	4318	224	6492	223	17424	220	329	213	9709	216	12891	216	7731	216	7868	218	858	242	1858	213	10751	223	6931	242	1960	216	6461	216	5380	220	106	213	9886	223	9405	222	2070	222	1479	223	20300	213	8970	230	3156	212	93310	211	38447
223	22405	225	2424	224	6287	222	5416	214	2154	218	1337	218	1585	218	1771	222	511	244	7516	214	1457	224	4169	244	6613	218	1430	218	1748	222	3791	214	1241	224	4393	223	4216	223	4861	224	6791	214	802	231	4031	213	9809	212	116764
224	5706	228	7032	225	604	223	86	216	14645	220	623	220	73	220	117	223	28018	246	1417	216	7390	226	684	246	1029	222	894	222	488	223	16895	216	14610	226	786	224	2691	224	3155	226	705	216	9250	232	6005	214	967	213	15161
226	276	230	3459	226	743	224	3554	218	524	222	2629	223	24239	223	27136	224	7608	247	149	218	1619	227	973	248	1246	223	30931	223	26762	224	6114	218	1352	227	706	226	627	226	507	228	6633	218	194	233	5427	216	9326	214	875
227	906	231	4813	228	6299	225	886	220	848	223	25516	224	6753	224	6958	225	2001	248	1586	220	76	228	6905	252	497	224	7520	224	7155	225	918	220	156	228	7125	228	5363	228	5680	229	19	222	259	234	20785	218	836	216	3479
228	5155	232	6774	229	533	226	1215	222	3421	224	7914	225	359	225	1325	226	1158	252	756	222	1485	229	113	254	1802	225	1896	225	902	226	960	223	69760	229	265	229	14	229	215	230	2571	223	4082	235	405	222	1701	218	386
230	3135	233	267	230	3054	228	5472	223	16734	226	727	226	816	226	1179	228	6453	254	1797	223	27669	230	3466	256	2229	226	1182	226	994	228	5461	224	11851	230	3532	230	2989	230	2660	231	6676	224	2155	236	916	223	2683	222	2109
231	4173	234	27665	231	4926	229	901	224	5420	228	7002	228	6415	228	6543	230	2842	256	2371	224	7325	231	5144	258	858	228	6673	228	6336	230	2771	225	5214	231	5016	231	6711	231	7178	232	6337	226	292	238	1574	224	2634	223	5406
232	5972	235	1758	232	6676	230	3005	225	669	229	561	229	42	229	43	231	5435	258	1171	225	1555	232	7834	260	157	230	2913	229	304	231	5020	226	1891	232	7649	232	7225	232	6543	233	4858	227	201	239	697	226	734	224	3797
233	10938	236	2539	233	5948	231	5051	226	806	230	2933	230	2725	230	2739	232	6976	260	303	226	1206	234	35424	262	1546	231	5516	230	2737	232	6534	227	2063	234	38151	234	29952	234	23757	234	23515	228	4174	240	8336	228	4691	226	362
234	16696	238	2624	234	23799	232	6169	228	6489	231	3495	231	5072	231	5229	233	6456	262	2013	228	6801	235	1672	264	288	232	7032	231	5181	233	5172	228	7863	235	1659	235	1010	235	887	235	1988	230	2256	241	228	230	2320	228	6094
235	1494	240	11683	235	1216	233	1106	229	278	232	8247	232	7251	232	7647	234	23576	264	296	229	75	236	2182	265	2583	233	9700	232	7248	234	24966	230	3294	236	2175	236	2221	236	2157	236	1717	231	7049	242	3336	231	7432	229	422
236	1988	242	4430	236	2569	234	26918	230	3251	233	4114	234	35597	234	38868	235	1588	265	3013	230	2708	238	3065	266	43201	234	26842	234	38478	235	1584	231	9839	238	3113	238	2618	238	2131	238	2141	232	4558	244	4578	232	5623	230	2439
238	1843	243	151	238	2698	235	2840	231	4245	234	25245	235	1680	235	2212	236	2357	266	47672	231	4781	239	1142	267	8606	235	1827	235	2039	236	2013	232	6197	239	1074	239	55	239	2	239	1282	233	3706	246	1372	233	2376	231	2300
239	2506	244	5786	239	505	236	1752	232	6702	235	1837	236	2438	236	2314	238	2421	267	9511	232	7507	240	14716	268	6601	236	2203	236	2278	238	2186	233	8205	240	15514	240	8346	240	7875	240	10985	234	15425	248	2128	234	19309	232	7131
240	10473	246	2048	240	11557	238	1361	233	5972	236	2867	238	2437	238	2791	239	2473	268	6985	233	10494	241	119	269	9892	238	2490	238	2422	239	1116	234	22740	242	4778	242	3465	242	2848	241	649	236	1163	249	1947	236	1670	233	2659
241	120	247	452	242	4500	239	1249	234	23584	238	2326	239	1587	239	1644	240	12022	269	11593	234	22838	242	4753	270	1880	239	2107	239	1624	240	10924	235	1351	244	10023	244	6483	244	5972	242	3348	238	1377	252	939	238	1756	234	26554
242	3912	248	1286	244	7194	240	6240	235	1624	239	532	240	12078	240	13122	241	1233	270	2304	235	2272	244	9558	274	472	240	12221	240	12754	241	6	236	2768	246	2189	245	389	245	617	244	7080	239	110	254	1682	239	425	235	1079
244	7205	249	4282	245	329	241	712	236	2957	240	11441	241	268	241	413	242	2773	274	442	236	2127	245	76	276	1129	241	856	241	228	242	2787	237	1189	247	1436	246	1590	246	1668	246	1194	240	6281	256	3866	240	6678	236	1936
246	1511	250	44	246	1711	242	2462	238	3173	241	568	242	3151	242	3555	244	8161	276	1377	238	2488	246	2235	279	30101	242	3090	242	3390	244	6933	238	2859	248	3741	247	175	247	394	247	256	242	1500	258	2341	242	1431	238	1569
247	348	252	1142	247	564	244	7151	239	1075	242	4133	244	6967	244	7756	245	68	279	26498	239	1582	247	1210	280	5550	244	8216	244	7096	246	1685	239	6356	249	795	248	3924	248	3586	248	4055	244	4686	262	4136	244	5484	239	399
248	3025	254	2549	248	2581	245	171	240	10203	244	8747	246	1347	246	1676	246	1532	280	4651	240	13025	248	3585	282	1547	245	89	246	1455	247	386	240	11274	250	124	249	3868	249	3939	249	3327	245	1120	263	500	245	482	240	12758
250	27	256	4793	249	931	246	1382	242	2639	245	365	247	3660	247	769	247	478	282	1647	241	332	249	785	284	768	246	1410	247	880	248	3450	241	871	252	1908	250	641	250	847	250	878	246	1728	264	352	246	1333	241	84
252	1171	258	2882	250	213	247	680	244	7643	246	2087	248	3610	248	3379	248	3517	284	853	242	3076	250	208	288	3325	247	454	248	3582	249	1611	242	4158	254	2942	252	1066	252	1132	252	964	247	648	266	43708	247	251	242	2864
254	2943	260	1906	252	1426	248	2116	245	467	247	966	249	784	249	1966	249	2171	288	3368	244	7840	252	1766	290	2059	248	3467	249	1387	250	188	244	8931	255	83	254	2286	254	1994	254	2445	248	2588	267	7491	248	3460	244	10298
256	4532	262	847	254	2111	249	2163	246	1555	248	3167	250	383	250	219	250	697	290	2273	245	106	254	2634	291	1426	249	2961	250	349	252	1052	245	806	256	3738	256	3026	256	2941	256	4285	249	4371	268	6280	249	5660	245	797
258	2313	263	186	256	3572	250	502	247	264	249	867	252	995	252	1246	252	1144	291	1395	246	1673	256	3734	292	2059	250	676	252	1205	254	2539	246	744	258	2308	258	1968	258	1955	258	2062	250	1627	269	5531	250	1346	246	2049
260	919	264	367	258	2181	252	1717	248	1927	250	176	254	2594	254	2723	254	2504	292	2263	247	648	258	2177	293	637	252	1162	254	2723	256	3411	248	6916	260	1401	259	32	260	1087	260	999	252	655	270	1897	252	849	247	824
261	251	266	47935	260	1310	254	1845	249	1088	252	1688	256	3331	256	3432	256	3786	293	684	248	3211	260	1327	294	3405	254	2372	256	3439	258	1581	249	7152	262	2158	260	1269	262	1866	262	1664	254	1407	272	137	254	1597	248	3102
262	1416	267	7828	262	2053	256	3267	250	66	254	2553	258	2092	258	2015	258	1928	294	3336	249	2057	262	1966	295	3032	256	3656	258	2084	260	1190	250	2005	264	599	262	1804	263	500	263	324	256	1552	273	139	256	2594	252	1436
264	908	268	6707	263	232	258	2839	252	2573	256	4348	260	967	260	774	260	1276	295	3070	250	339	264	631	296	28488	258	1859	260	1021	262	1072	252	697	266	77909	263	330	264	664	264	930	258	1050	274	276	258	1515	254	2274
265	2502	269	10330	264	465	260	490	254	2998	258	2930	262	1222	262	1486	262	1401	296	29380	252	1528	265	581	302	1301	260	1251	262	1426	264	648	253	602	267	16438	264	854	265	175	265	6581	259	130	276	2796	260	953	256	3431
266	51226	270	3426	266	50197	262	2355	256	3829	260	1228	264	527	263	220	263	620	302	1502	254	2859	266	72871	303	836	262	1498	263	44	265	3446	254	1827	268	7712	266	45940	266	44342	266	42247	260	919	279	88897	261	121	258	2594
267	10328	273	1128	267	10181	263	309	258	2142	262	1603	265	7103	264	698	264	506	303	196	256	3915	267	15211	304	10738	263	541	264	640	266	41623	255	149	269	12387	267	9858	267	9731	267	10370	262	2796	280	7606	262	2242	260	965
268	5181	274	315	268	6486	264	626	260	569	263	355	266	42630	266	58873	265	3157	304	12403	258	1936	268	7339	305	2477	264	575	265	5851	267	9391	256	4163	270	3463	268	6500	268	6356	268	6654	263	878	281	979	263	887	261	339
269	8169	275	483	269	9570	265	2571	261	13	264	1106	267	9938	267	10846	266	49044	305	2507	260	847	269	10951	306	697	265	3318	266	46336	268	7596	258	1846	272	150	269	5428	269	5306	269	4151	264	332	282	2125	264	657	262	3590
270	2401	276	694	270	2627	266	44125	262	892	266	58267	268	8032	268	8171	267	10161	306	907	262	1742	270	3314	308	4653	266	50410	267	10545	269	10095	259	362	273	391	270	1749	270	1412	270	2089	266	36912	288	4955	265	2329	264	439
272	1165	279	95361	272	453	267	9558	263	367	267	10172	269	10114	269	12640	268	8240	308	4881	263	131	272	249	309	163	267	10824	268	8325	270	2953	260	614	274	1044	272	704	272	447	272	889	267	8860	289	1573	266	35683	265	1751
273	1542	280	13003	273	589	268	7506	264	795	268	7257	270	2760	270	3555	269	13553	309	192	264	746	273	440	310	78	268	8496	269	11371	272	329	261	54	276	2038	273	940	273	628	273	911	268	4821	290	2407	267	8757	266	62899
274	910	281	1796	274	656	269	12730	266	47325	269	11429	272	169	272	245	270	3324	310	176	266	57536	274	1040	316	578	269	13958	270	3059	273	345	262	1583	279	110282	274	332	274	331	274	1245	269	4994	291	1857	268	5509	267	12791
276	1834	282	1304	276	2150	270	2282	267	8310	270	2686	273	480	273	722	272	908	316	522	267	11068	276	2100	320	329	270	3337	272	59	274	986	263	1255	280	17114	276	1949	276	1721	276	1719	270	1345	292	682	269	7297	268	6934
279	69616	284	1076	279	115338	272	1189	268	7434	272	1468	274	848	274	967	273	385	319	101	268	7958	279	104505	321	297	272	686	273	478	276	1493	264	233	281	1284	279	71091	279	130234	279	106730	273	192	293	2342	270	1862	269	5887
280	15303	286	1308	280	20646	273	394	269	12262	273	781	276	1572	276	1765	274	866	320	273	269	12540	280	16580	322	50	273	556	274	865	279	185408	265	6708	282	1959	280	16283	280	25728	280	22299	274	608	294	3822	272	492	270	1998
281	1898	288	5483	281	1869	274	798	270	2481	274	1226	279	81601	279	86055	276	1359	321	340	270	3240	281	833	324	340	274	750	276	1567	280	32719	266	55027	284	1423	281	521	281	2408	281	1380	276	1492	295	34413	273	1093	273	693
282	2057	289	55	282	1350	276	2029	272	1049	276	2043	280	14973	280	16372	279	81688	322	146	272	148	282	1893	330	1082	276	1347	279	84761	281	4066	267	13732	286	767	282	1216	282	1505	282	1694	279	145085	300	113	274	504	274	670
284	1898	290	2904	284	1618	279	62779	273	614	279	223602	281	1768	281	1748	280	15461	324	284	273	507	284	1368	332	663	279	79199	280	15297	282	1428	268	8421	288	4781	284	1389	284	1354	284	1563	280	24366	302	2040	276	1319	276	2177
286	1530	291	2845	286	424	280	10064	274	922	280	36834	282	1446	282	1544	281	1234	330	1254	274	941	286	628	334	3149	280	14750	281	1901	284	1653	269	17580	289	1535	288	4263	288	4006	288	5155	281	3175	303	1995	279	165904	279	276677
288	3539	292	2467	288	5329	281	982	276	1724	281	5120	284	1306	284	1912	282	1575	332	679	276	1561	288	4944	335	223	281	1316	282	1332	286	291	270	4084	290	2612	289	537	289	266	289	822	282	1770	304	11925	280	28118	280	49128
289	338	293	638	290	2638	282	959	279	324736	282	1728	286	317	285	46	284	1831	334	3416	279	83607	289	1450	336	328	282	1609	284	1278	288	4617	272	1151	291	3344	290	2200	290	2353	290	2489	284	443	305	2204	281	3517	281	6156
290	3384	294	4572	291	2352	284	1204	280	53778	284	2480	288	4697	286	676	286	1039	335	276	280	15145	290	2516	343	96	284	1759	286	487	289	276	273	407	292	2425	291	2143	291	2581	291	2704	286	76	306	1070	282	1695	282	1989
291	4560	295	34625	292	2124	286	473	281	6467	286	444	289	687	288	5309	288	4510	336	317	281	1207	291	3243	344	579	286	1386	288	5185	290	2212	274	1449	293	1226	292	2321	292	2216	292	2439	288	3652	307	207	284	1125	284	1461
292	2620	298	785	293	790	288	5250	282	2085	288	5791	290	1914	289	979	289	280	343	173	282	1775	292	2395	345	808	288	5074	289	812	291	2063	276	2013	294	6313	293	1342	293	1333	293	1448	289	9	308	3537	286	586	286	361
293	1111	301	38	294	4505	289	302	284	1058	290	2525	291	1940	290	1983	290	2059	344	598	284	1872	293	1366	346	2159	289	433	290	2096	292	2026	279	68186	295	1569	294	3678	294	3317	294	4809	290	1888	309	559	288	3935	288	4315
294	3823	302	2010	295	36473	290	2102	286	2164	291	3621	292	1865	291	2516	291	3208	345	1359	286	980	294	6306	347	269	290	1871	291	2186	293	1658	280	11219	296	34890	296	27153	295	30276	296	30955	291	1653	310	64	289	1115	289	273
295	3713	303	1594	298	245	291	2808	288	4797	292	2182	293	765	292	2128	292	2181	346	1991	288	4757	295	1271	348	105	291	3132	292	1871	294	4476	281	1197	298	819	298	28	300	485	298	245	292	1003	316	1439	290	1584	290	2895
296	27786	304	11218	300	424	292	1694	289	809	293	1395	294	5390	293	1314	293	1277	347	538	289	914	296	33571	349	275	292	2122	293	681	295	3730	282	3198	300	498	300	516	302	1243	300	408	293	1096	317	319	291	2161	291	2335
297	95	305	3405	302	1028	293	1122	290	2296	294	6584	296	32069	294	5373	294	4270	348	157	290	2031	298	760	350	276	293	1165	294	5098	296	32490	284	2777	302	2028	302	1545	303	1421	301	60	294	6454	318	134	292	1767	292	2837
298	1441	306	2130	303	1951	294	3891	291	2583	295	1098	302	860	295	359	296	30347	350	458	291	2558	300	394	352	116	294	4106	295	894	298	120	285	1481	303	1154	303	2234	304	10308	302	1631	296	26080	320	171	293	1105	293	955
300	1171	307	938	304	11253	296	29546	292	2338	296	40361	303	1026	296	32290	298	415	352	40	292	2080	302	2030	355	188	296	30873	296	32089	302	839	286	1078	304	17808	304	9636	305	1898	303	1877	298	289	321	410	294	5692	294	2753
301	559	308	4582	305	2839	298	222	293	4185	298	1003	304	16506	298	212	302	1595	354	91	293	1417	303	1791	356	1127	298	581	302	921	303	1110	287	1582	305	3416	305	1806	306	823	304	11292	300	174	322	391	295	646	295	55525
302	1589	309	234	306	1337	300	1200	294	1165	300	751	305	2590	302	1073	303	1283	356	1479	294	4850	304	17198	366	163	300	59	303	1570	304	12876	288	4459	306	1102	306	1133	307	173	305	2129	302	965	324	333	296	27732	298	691
303	1785	310	553	307	1067	302	1386	295	51760	302	1157	306	1062	303	1218	304	15587	360	78	295	2429	305	3113	370	404	302	1432	304	16925	305	2613	289	547	307	1604	307	94	308	3957	306	1393	303	469	330	395	298	104	302	2776
304	13683	312	381	308	4722	303	1194	298	225	303	1224	307	778	304	17216	305	3009	366	198	296	29071	306	1172	376	155	303	646	305	2628	306	1272	290	930	308	6276	308	4445	309	475	307	477	304	7765	332	1216	300	567	303	3276
305	2462	316	107	309	186	304	11077	300	419	304	12849	308	4546	305	2782	306	910	370	121	298	110	307	1593	378	79	304	16836	306	964	307	672	291	6017	309	346	309	254	310	176	308	5600	305	1625	333	93	302	942	304	12691
306	524	317	302	310	140	305	2019	302	2866	305	2100	309	561	306	1160	307	1318	377	177	302	1398	308	6118	379	106	305	3120	307	545	308	4227	292	2299	310	561	310	150	312	337	309	572	306	844	334	2548	303	1692	305	3116
307	1251	318	419	312	208	306	965	304	13507	306	1837	310	397	307	746	308	4466	378	89	303	558	309	312	380	27	306	990	308	4944	309	739	293	2317	312	36	312	83	316	1227	310	222	307	154	335	30	304	8068	306	1045
308	5154	320	1021	316	1493	307	906	305	1889	307	780	312	469	308	4919	309	246	379	49	304	17352	310	534	382	123	307	1052	309	481	312	232	294	1327	316	1204	316	1591	317	717	312	283	308	3130	337	271	305	1976	307	830
309	610	321	58	317	274	308	3147	306	1024	308	5117	316	677	309	594	310	380	380	40	305	2993	312	74	385	272	308	4846	310	259	316	1588	296	24744	317	254	317	819	318	192	316	1197	309	147	342	181	306	860	308	5761
310	526	322	870	318	189	309	771	307	496	309	684	317	268	310	346	312	425	382	110	306	1442	316	1208	386	7828	309	297	312	377	317	334	297	3234	318	154	318	347	319	111	317	383	310	275	343	33	307	391	309	193
312	470	323	612	320	707	310	396	308	4939	310	323	318	355	312	260	316	848	385	733	307	523	317	328	388	13364	310	227	316	771	318	383	298	2056	319	214	320	619	320	487	318	350	312	288	344	287	308	3666	310	31
316	1244	324	175	322	883	316	805	309	617	312	667	320	680	316	638	317	667	386	7869	308	4913	318	137	390	1325	312	476	317	187	320	770	302	583	320	410	322	903	322	786	320	699	316	1113	345	645	309	48	312	422
317	477	326	199	323	36	317	105	310	210	316	1604	322	578	317	290	318	227	388	12939	309	633	319	80	391	328	316	896	318	427	321	286	304	22421	321	923	324	177	323	143	321	8	317	675	346	786	310	319	316	778
318	809	328	494	324	526	318	471	314	328	317	154	323	62	318	629	319	129	390	1501	310	257	320	483	398	45	317	531	320	690	322	672	305	3201	322	599	327	130	324	203	322	627	318	415	348	522	312	397	317	1398
319	200	330	2257	328	190	319	191	316	1297	318	320	324	525	320	727	320	492	391	330	312	252	322	1432	403	596	318	288	322	674	324	485	306	799	323	19	330	1333	327	87	323	84	320	383	349	179	316	1025	318	327
320	741	332	1261	330	1856	320	633	317	226	320	699	326	103	322	715	321	312	396	11	316	707	323	65	406	1385	319	143	323	55	326	101	307	844	324	247	332	531	330	1352	324	305	321	13	350	195	317	582	319	72
321	485	333	606	331	270	321	359	318	166	321	660	330	1334	323	96	322	632	400	117	317	386	324	275	407	677	320	528	324	546	330	1544	308	5820	330	2756	333	216	332	577	326	95	322	735	354	145	318	485	320	657
322	1284	334	2212	332	408	322	848	319	331	322	360	332	491	324	661	324	496	404	928	318	622	328	54	408	225	321	263	326	164	332	811	309	406	332	848	334	2723	333	321	330	1716	324	274	356	1583	320	470	322	767
324	252	335	35	333	153	324	616	320	630	324	605	333	229	326	72	326	241	406	772	320	864	330	2560	413	46	322	709	330	1359	333	349	310	380	334	4852	335	273	334	2689	331	107	326	215	360	89	321	154	323	450
326	424	336	422	334	2951	330	1305	321	300	326	318	334	2773	330	1498	329	13	407	1011	322	822	332	617	422	67	324	474	332	585	334	2691	313	282	335	863	336	203	335	286	332	665	330	536	361	60	322	797	324	358
330	1940	338	344	335	52	332	541	322	633	328	91	335	302	332	543	330	1515	408	792	323	138	334	4626	424	72	326	262	333	147	335	614	316	809	336	497	337	278	336	405	333	363	332	641	362	254	323	170	326	452
332	1166	340	136	336	410	333	411	323	449	330	1323	336	162	333	133	332	949	409	130	324	600	335	893	425	74	330	1660	334	2865	336	296	317	1126	342	303	342	85	340	8	334	2675	333	608	363	43	324	321	330	1388
333	116	344	957	338	53	334	2158	324	601	332	1348	340	152	334	2997	334	3326	412	246	326	39	336	538	428	328	332	817	335	442	337	283	318	185	344	1275	344	1392	344	917	335	353	334	1663	364	219	326	227	332	646
334	3266	345	728	340	190	335	379	326	483	333	300	342	18	335	403	335	484	422	51	330	1709	342	270	429	4355	333	1	336	200	338	251	319	101	345	1191	345	1314	345	1105	336	493	335	78	368	451	330	1197	333	74
335	656	346	3426	343	14	336	301	330	1303	334	2904	344	1115	336	136	336	317	423	75	332	517	344	1027	430	8816	334	3350	340	133	340	121	320	589	346	1711	346	709	346	375	338	169	338	219	370	1139	332	522	334	3595
336	640	348	418	344	777	337	22	332	1528	335	689	345	375	340	222	338	160	424	103	333	132	345	515	431	884	335	493	342	116	342	112	321	691	347	163	347	34	347	404	342	145	344	796	377	162	333	627	335	878
338	34	350	213	345	1254	340	27	333	430	336	599	346	2730	342	168	340	106	425	63	334	2804	346	2216	432	240	336	263	344	1136	343	923	324	1353	348	241	348	341	348	213	344	630	345	401	379	420	334	1973	336	311
340	340	351	334	346	2283	342	347	334	3203	337	173	348	395	344	884	342	2	428	1188	335	644	347	196	435	63	338	245	345	1352	344	747	326	435	349	170	349	87	349	14	345	1240	346	865	380	465	335	137	338	40
343	237	352	293	347	135	344	1809	335	176	338	230	350	262	345	911	344	1732	429	13415	336	165	348	233	436	102	340	73	346	2049	345	1196	330	2171	350	379	350	169	350	70	346	1046	348	126	382	253	336	59	340	136
344	981	353	149	348	298	345	719	337	503	342	273	351	89	346	2941	345	1111	431	1069	340	224	350	337	442	234	344	1749	348	441	346	1836	332	850	352	169	351	115	351	196	347	247	350	54	385	714	339	288	342	9
345	1433	356	1547	350	153	346	1866	338	655	344	1175	356	1616	347	382	346	1974	435	72	342	443	352	248	444	24	345	1184	350	421	348	475	333	107	356	2094	355	96	355	248	348	511	351	40	386	7294	342	200	344	1352
346	1630	358	298	351	228	347	27	340	272	345	264	357	8	348	120	347	143	436	108	344	1012	354	61	451	31	346	1659	351	53	350	380	334	3654	358	314	356	1750	356	1886	349	73	352	406	387	15123	343	234	345	839
347	430	361	114	353	47	348	119	342	247	346	3093	360	129	349	42	348	330	438	16	345	835	356	1912	454	97	347	196	356	1771	351	245	335	879	359	6	358	128	357	25	350	536	356	432	388	3192	344	199	346	1769
348	1173	364	65	356	1253	349	12	343	13	347	22	363	163	350	440	349	139	442	250	346	3006	358	281	459	17	348	242	360	173	352	158	336	500	360	90	360	48	358	154	352	263	358	53	389	1984	345	550	348	17
350	444	366	266	357	108	350	136	344	977	348	761	365	208	351	3	350	292	444	57	347	92	360	89	460	707	349	187	362	60	354	20	338	708	362	54	362	35	360	132	356	1671	360	17	390	2529	346	1292	350	228
351	309	367	247	358	89	351	128	345	748	349	209	368	322	356	1655	351	353	453	80	348	371	364	52	462	39547	350	256	365	182	356	1607	342	10	364	27	365	231	365	48	357	44	363	6	391	5287	348	448	352	188
352	699	369	45	360	52	352	305	346	2096	350	629	369	16	360	207	352	487	459	85	349	23	366	192	463	16950	351	358	368	348	358	294	343	422	366	441	366	7	366	192	358	1	364	152	392	1453	350	146	354	52
353	339	376	248	365	379	356	2722	347	271	351	222	370	657	363	142	354	111	460	745	350	764	367	92	464	10699	352	425	370	469	360	29	344	1159	376	93	369	526	369	679	359	355	365	197	402	251	351	92	356	1663
354	154	378	269	366	45	360	36	348	392	356	2238	376	101	365	169	356	2564	461	1560	351	67	368	1	465	3254	354	118	376	123	361	209	345	2061	377	37	370	424	370	17	362	65	366	17	406	1097	352	261	357	166
355	471	379	56	370	365	362	29	349	239	358	387	378	303	366	41	357	15	462	37350	354	184	376	77	466	980	356	2490	378	234	363	140	346	654	378	145	376	41	378	158	363	83	368	171	407	504	354	441	358	29
356	2004	380	102	377	138	363	106	351	984	362	198	379	65	368	258	358	140	463	17882	356	1264	377	12	467	172	358	109	379	27	364	385	348	122	379	205	378	350	379	273	366	38	369	433	408	2392	355	255	359	249
360	91	385	43	378	25	366	210	352	166	364	133	380	142	369	121	360	228	464	11442	360	281	378	65	477	287	360	209	380	107	367	79	349	530	380	84	380	5	380	85	367	254	378	20	415	150	356	953	360	28
361	175	386	11725	379	464	369	181	354	17	366	304	385	875	370	794	361	335	465	3262	362	127	379	199	478	17	361	110	385	1040	369	45	350	359	385	1645	384	94	382	199	369	539	379	149	416	231	358	324	362	105
362	214	387	2149	380	37	376	303	356	1817	368	44	386	8744	376	196	363	93	466	1021	364	54	380	101	479	176	363	59	386	9231	370	309	351	111	386	16207	385	1156	385	766	370	360	380	298	421	32	361	63	364	329
363	254	388	15755	385	144	377	318	357	316	378	310	387	1440	378	46	364	60	467	175	365	17	384	59	480	447	365	60	387	1572	376	11	352	372	387	3619	386	8232	386	8320	377	65	382	52	423	47	363	238	366	22
364	101	389	2131	386	11653	378	11	358	131	379	137	388	16643	379	14	366	405	477	267	368	158	385	966	481	66	366	51	388	16737	378	214	356	1194	388	18969	387	662	388	18269	378	72	386	8756	424	205	364	137	376	205
365	42	390	2459	387	551	379	253	360	348	380	217	389	3425	380	53	368	5	478	25	369	14	386	15450	482	128	370	495	389	3823	379	234	357	92	389	3254	388	18120	389	3385	379	200	388	14313	428	1210	366	121	378	78
366	394	391	4895	388	16889	381	31	362	118	381	155	390	3030	382	9	370	653	479	35	370	794	387	2869	485	108	376	58	390	2999	380	25	358	341	390	3111	389	3826	390	2751	385	698	389	535	429	1777	368	114	379	129
369	845	392	1954	389	3408	382	174	363	451	385	1643	391	3756	383	75	376	53	480	559	376	187	388	19172	486	54	378	266	391	4150	385	179	366	298	391	5793	390	2819	391	5393	386	8877	390	2206	430	4392	369	700	380	166
370	1887	396	217	390	3123	384	41	364	108	386	11165	392	956	385	1035	378	341	481	67	378	64	389	2986	489	791	379	111	392	922	386	8936	369	579	392	1091	391	2101	392	1237	387	2050	391	3583	433	1	370	556	381	224
377	175	400	416	391	3471	386	11083	365	90	387	3435	393	6	386	9931	379	163	482	84	380	55	390	2753	490	109	380	149	396	19	387	1776	370	4039	393	49	392	754	396	20	388	17199	392	917	434	9	377	65	384	181
378	224	405	607	392	1116	387	155	366	403	388	16733	396	21	387	2218	380	198	486	46	382	33	391	5069	491	105	382	89	398	41	388	17755	377	319	394	51	394	40	397	43	389	3805	393	138	436	204	378	131	385	1366
379	1194	406	1347	393	27	388	19038	370	334	389	5185	398	48	388	16036	382	86	489	619	385	691	392	1090	492	32	385	1160	403	528	389	3166	378	71	395	16	398	142	402	898	390	3281	396	200	437	139	379	111	386	11778
380	354	407	983	394	16	389	3969	378	677	390	2323	403	603	389	3358	385	1002	490	158	386	10405	393	42	494	28	386	10642	405	649	390	2911	379	98	400	11	400	244	405	39	391	2990	404	815	438	121	380	198	388	17833
381	60	412	165	396	82	390	3467	379	499	391	4607	405	639	390	2911	386	10397	491	70	387	2379	394	282	498	14	387	3932	406	343	391	5299	382	175	405	647	402	687	406	355	392	529	406	570	456	84	382	36	389	1789
382	377	414	211	398	37	391	6733	380	96	392	1695	406	309	391	4324	387	3733	493	16	388	15291	396	12	499	19	388	16581	407	850	392	1789	384	47	406	1044	406	121	407	1306	394	56	407	928	460	790	385	2110	390	2215
385	4068	417	108	402	23	392	1151	385	2414	393	3	407	957	392	738	388	17763	494	7	389	3396	405	654			389	2223	408	688	393	59	385	2125	407	1348	407	611	408	388	398	185	408	318	461	5554	386	6623	391	3732
386	20233	420	135	405	866	394	44	386	7503	394	112	408	800	396	63	389	1367	500	19	390	2736	406	525			390	3004	409	124	395	30	386	12304	408	519	408	1200	409	505	403	15	409	107	462	43053	387	1498	392	419
388	23595	421	40	406	1162	396	67	387	5033	401	521	409	186	398	44	390	3123			391	4327	407	1464			391	7680	414	194	402	402	388	18666	409	88	410	118	410	88	404	284	410	175	463	17555	388	14800	395	8
389	3357	422	91	407	1478	405	569	388	16023	404	697	414	120	403	490	391	8265			392	871	408	1175			392	2071	416	252	405	1639	389	2194	414	397	416	18	414	370	406	445	414	200	464	12464	389	1983	405	317
390	2433	425	68	408	435	406	777	389	5121	405	53	415	116	405	731	392	2228			393	62	409	89			393	189	422	112	406	731	390	3496	416	29	418	211	416	147	407	530	415	146	465	3002	390	2491	406	565
391	6828	429	2119	410	234	407	641	390	4077	406	504	416	42	406	475	393	419			396	90	412	17			394	54	425	39	407	922	391	9167	418	154	421	116	418	108	408	836	416	58	466	1210	391	4772	407	1251
392	1767	430	8931	414	388	408	292	391	3182	407	424	422	113	407	651	394	23			398	106	414	397			396	170	429	1460	408	412	392	1325	421	199	422	21	420	64	410	121	417	34	467	72	392	860	408	716
393	44	431	513	416	81	409	69	392	683	408	1376	425	45	408	748	396	219			405	672	421	89			402	227	430	9000	409	23	393	137	423	50	423	27	421	9	414	241	418	35	473	8	395	146	409	220
397	341	432	271	420	0	415	4	394	340	410	112	427	10	409	234	403	700			406	392	422	25			403	587	431	596	414	25	404	30	424	130	425	87	422	46	416	61	420	109	477	50	404	237	414	101
404	1428	435	35	421	11	416	4	400	253	414	341	429	1498	414	360	405	277			407	635	423	57			405	236	435	285	416	245	405	658	425	50	428	793	424	321	417	47	422	75	479	305	406	443	416	137
406	2134	436	288	422	118	418	373	406	1183	415	129	430	8290	416	172	406	683			408	992	424	128			406	948	436	17	417	201	406	970	428	906	429	4756	429	1527	419	88	424	90	480	278	407	1300	419	559
407	1264	437	227	424	10	424	79	407	530	422	52	431	282	420	94	407	1056			409	251	426	267			407	1052	437	79	418	258	407	1148	429	6440	431	711	430	3989	420	175	428	999	488	94	408	109	420	70
408	847	438	146	426	77	426	184	408	1493	428	1714	435	176	422	162	408	1083			412	109	428	859			408	1003	439	0	419	529	408	1398	430	5168	432	2	431	536	421	51	430	5823	489	670	409	27	423	116
409	164	441	228	428	810	428	702	410	43	429	6888	436	81	429	1624	409	58			414	218	429	10851			409	87	444	52	420	132	412	268	431	1487	434	148	432	155	424	96	431	564	491	49	410	69	426	114
410	300	444	386	429	2892	430	8897	412	41	430	4925	438	57	430	9897	410	116			416	229	431	1203			410	104	449	990	421	99	413	193	432	174	436	147	434	99	427	94	433	118	492	22	412	96	428	104
414	1979	452	152	430	8083	431	900	414	221	431	868	449	950	431	785	411	27			419	74	432	361			414	195	456	30	424	56	414	243	433	110	438	107	436	149	428	779	434	107			414	3	429	2888
415	263	453	39	431	1002	434	97	416	199	432	562	459	66	432	316	414	261			421	87	434	62			416	122	458	27	426	30	415	232	434	42	439	24	438	185	429	4613	435	353			415	199	430	9794
416	611	455	102	433	143	435	125	418	588	433	208	460	793	435	225	415	466			422	196	435	53			419	572	459	24	427	22	418	65	436	313	444	301	441	9	431	917	436	132			417	23	431	1388
418	141	457	67	435	471	438	73	422	62	434	50	462	52751	436	53	416	149			428	486	438	137			420	119	460	778	428	1158	419	404	437	23	451	191	444	502	432	61	437	104			418	113	432	53
420	254	459	189	436	75	442	69	424	109	435	58	463	20704	438	67	418	70			429	2821	441	31			421	35	462	54543	429	3623	420	262	441	37	456	59	454	63	434	131	441	137			419	160	435	223
422	33	460	213	437	172	452	49	425	142	436	128	464	14183	442	83	419	759			430	8031	443	123			424	54	463	21101	430	8030	421	30	444	324	459	121	458	79	435	118	450	265			420	241	438	93
424	210	461	8117	444	282	459	314	427	666	437	9	465	4261	444	382	420	237			431	863	444	287			426	34	464	14777	431	995	424	76	454	52	460	1302	459	154	436	11	452	191			422	42	451	83
426	275	462	42300	451	66	460	1230	428	1079	439	163	466	1714	456	9	421	112			432	363	452	27			428	1066	465	4385	433	323	427	34	458	169	461	5631	460	1485	438	191	454	121			428	667	454	32
428	2760	463	19834	452	39	461	5742	429	6782	444	475	467	217	458	32	424	71			434	168	454	44			429	1227	466	1764	435	565	428	503	460	1241	462	39237	461	1646	453	16	456	92			429	2820	458	1
429	8623	464	15288	455	86	462	45764	430	7806	454	19	471	20	459	158	428	573			436	233	459	102			430	8850	467	191	436	41	429	2149	461	5072	463	17496	462	40493	456	158	458	229			430	4480	459	338
430	2444	465	4689	459	114	463	17023	431	2051	456	97	475	9	460	762	429	1693			437	117	460	1197			431	1211	475	57	437	53	430	8162	462	51684	464	13426	463	16248	459	433	460	1361			431	398	460	420
431	1875	466	1755	460	1262	464	12713	432	116	460	593	478	261	461	2321	430	9019			438	62	461	7094			432	253	478	532	439	5	431	1587	463	24100	465	4095	464	11524	460	1606	461	2065			434	245	461	1066
432	87	467	416	461	4175	465	4059	433	320	461	3603	480	456	462	53081	431	1446			442	100	462	47149			433	225	479	17	453	123	436	455	464	15982	466	1169	465	3294	461	4736	462	33191			435	188	462	50312
434	86	470	376	462	43886	466	1621	434	222	462	54836	481	104	463	22101	432	6			444	124	463	23545			435	314	480	417	454	103	437	111	465	3879	468	39	466	1333	462	50571	463	13231			436	37	463	20101
435	389	472	166	463	17449	467	54	436	51	463	21139	487	78	464	15587	433	284			459	107	464	15287			437	146	481	93	458	109	440	21	466	1683	474	75	467	69	463	19911	464	8398			437	98	464	14282
438	170	473	132	464	13922	475	19	439	198	464	14485	488	112	465	4356	435	376			460	1029	465	3706			439	5	487	68	459	301	459	324	467	47	475	72	468	34	464	15241	465	2131			439	43	465	3854
439	393	474	14	465	4228	478	345	441	100	465	4729	489	468	466	1765	438	148			462	54588	466	1751			444	563	488	194	460	1825	460	6202	472	126	476	46	473	15	465	3965	466	843			444	570	466	1531
442	418	478	404	466	1703	479	118	443	18	466	1701	490	169	467	189	444	386			463	22066	467	99			451	21	489	437	461	2674	462	48855	476	25	478	652	474	122	466	1785	467	86			457	16	467	272
443	240	479	672	468	128	480	714	455	49	467	117	491	117	472	33	458	165			464	15880	468	1			458	258	490	142	462	46511	463	18384	478	620	479	11	475	182	468	268	468	285			458	9	468	18
444	419	480	1470	473	111	482	13	458	64	474	326	493	23	475	101	459	1			465	4080	472	154			459	171	491	108	463	18870	464	13491	479	405	480	553	478	468	471	116	473	50			460	3014	469	11
449	980	481	286	474	7	485	9	459	240	475	133	498	52	478	626	460	1952			466	1803	476	238			460	1992	493	20	464	14394	465	3761	480	326	481	80	479	416	474	42	474	130			461	177	475	74
452	85	482	78	478	67	487	63	460	1680	478	621	500	17	479	13	461	1946			467	265	478	519			461	2505	498	45	465	4327	466	1753	481	123	482	22	480	408	476	167	478	483			462	38272	477	192
453	122	486	97	479	78	488	258	462	54319	479	415			480	552	462	44632			475	87	479	406			462	46422	500	15	466	1390	473	22	482	138	488	323	481	19	478	656	479	112			463	15761	478	539
456	434	488	365	480	658	489	612	463	20603	480	548			481	97	463	19745			478	615	480	387			463	21330			467	381	477	386	486	16	489	465	488	100	479	526	480	57			464	9671	479	517
458	112	489	233	482	81	490	217	464	15580	481	278			483	8	464	13512			479	261	481	113			464	12958			469	3	478	62	488	185	490	119	489	549	480	269	481	89			465	2905	480	81
459	460	492	69	487	15	492	72	465	3733	482	165			484	22	465	3848			480	311	482	145			465	4027			472	108	480	412	489	979	491	18	490	84	481	123	485	110			466	1236	481	74
460	394	495	262	488	350	493	21	466	1263	483	177			487	52	466	1853			481	144	488	250			466	1701			475	0	483	39	490	321	492	37	491	31	482	123	486	37			467	119	482	172
461	2804			489	558			470	121	486	114			488	225	467	109			484	33	489	1021			467	35			478	649	484	67	491	78	497	36	492	85	484	69	487	66			468	195	486	15
462	49628			490	2			475	190	487	42			489	523	468	83			488	396	490	360			468	77			479	140	489	672	496	39	499	26	499	53	486	61	489	717			473	45	488	665
463	19410			491	150			478	433	488	551			490	123	469	3			489	368	491	60			471	12			480	342	490	104	499	87					488	31	491	29			474	133	489	790
464	13626			492	124			479	611	489	750			491	96	470	33			490	220	496	44			473	30			481	46	492	73							489	223	492	174			476	101	490	128
465	3380			493	18			480	282	490	116			493	38	473	60			491	39	500	43			477	236			482	81	495	5							490	469	494	41			478	511	491	104
466	1087			495	56			483	66	491	96			494	8	477	242			492	3					478	599			483	54									491	101					479	220
467	279			496	25			486	126	493	55			498	45	478	344			493	48					479	286			484	93									492	103					480	160
468	479							487	130	495	14			500	7	479	308									480	266			487	42									497	8					481	61
470	222							488	761	499	21					480	246									481	41			489	871															482	47
473	9							489	772							481	161									482	92			490	314															484	102
474	109							490	209							482	72									483	9			491	81															486	48
476	395							492	20							484	130									484	102			492	14															487	87
478	472							493	25							486	109									486	72			493	25															488	80
479	131							497	13							488	24									487	11																			489	642
480	597							498	6							489	513									488	50																			490	27
481	452															490	69									489	491																			491	42
482	112															491	42									490	92																			492	6
483	28															492	110									491	27																			493	8
484	533															494	54									492	86																			496	10
485	143															498	121									494	47
486	136															500	24									498	102
487	0																									500	18
489	1074
490	355
491	51
492	17
497	17
498	107
500	56
[truncated: 22 more columns]

## Sheet: stored for 2 years
1												2												3												4												5
SPECTRUM - MS		SPECTRUM - MS		SPECTRUM - MS		SPECTRUM - MS		SPECTRUM - MS		SPECTRUM - MS		SPECTRUM - MS		SPECTRUM - MS		SPECTRUM - MS		SPECTRUM - MS		SPECTRUM - MS		SPECTRUM - MS		SPECTRUM - MS		SPECTRUM - MS		SPECTRUM - MS		SPECTRUM - MS		SPECTRUM - MS		SPECTRUM - MS		SPECTRUM - MS		SPECTRUM - MS		SPECTRUM - MS		SPECTRUM - MS		SPECTRUM - MS		SPECTRUM - MS		SPECTRUM - MS
dapci-lotus seeds_2010-1.raw		dapci-lotus seeds_2010-1.raw		dapci-lotus seeds_2010-1.raw		dapci-lotus seeds_2010-1.raw		dapci-lotus seeds_2010-1.raw		dapci-lotus seeds_2010-1.raw		dapci-lotus seeds_2010-2.raw		dapci-lotus seeds_2010-2.raw		dapci-lotus seeds_2010-2.raw		dapci-lotus seeds_2010-2.raw		dapci-lotus seeds_2010-2.raw		dapci-lotus seeds_2010-2.raw		dapci-lotus seeds_2010-4.raw		dapci-lotus seeds_2010-4.raw		dapci-lotus seeds_2010-4.raw		dapci-lotus seeds_2010-4.raw		dapci-lotus seeds_2010-4.raw		dapci-lotus seeds_2010-4.raw		dapci-lotus seeds_2010-5.raw		dapci-lotus seeds_2010-5.raw		dapci-lotus seeds_2010-5.raw		dapci-lotus seeds_2010-5.raw		dapci-lotus seeds_2010-5.raw		dapci-lotus seeds_2010-5.raw		dapci-lotus seeds_2010-6.raw
ITMS + c ESI Full ms [65.05-500.00]		ITMS + c ESI Full ms [65.05-500.00]		ITMS + c ESI Full ms [65.05-500.00]		ITMS + c ESI Full ms [65.05-500.00]		ITMS + c ESI Full ms [65.05-500.00]		ITMS + c ESI Full ms [65.05-500.00]		ITMS + c ESI Full ms [65.05-500.00]		ITMS + c ESI Full ms [65.05-500.00]		ITMS + c ESI Full ms [65.05-500.00]		ITMS + c ESI Full ms [65.05-500.00]		ITMS + c ESI Full ms [65.05-500.00]		ITMS + c ESI Full ms [65.05-500.00]		ITMS + c ESI Full ms [65.05-500.00]		ITMS + c ESI Full ms [65.05-500.00]		ITMS + c ESI Full ms [65.05-500.00]		ITMS + c ESI Full ms [65.05-500.00]		ITMS + c ESI Full ms [65.05-500.00]		ITMS + c ESI Full ms [65.05-500.00]		ITMS + c ESI Full ms [65.05-500.00]		ITMS + c ESI Full ms [65.05-500.00]		ITMS + c ESI Full ms [65.05-500.00]		ITMS + c ESI Full ms [65.05-500.00]		ITMS + c ESI Full ms [65.05-500.00]		ITMS + c ESI Full ms [65.05-500.00]		ITMS + c ESI Full ms [65.05-500.00]
Scan #: 504-511		Scan #: 712-717		Scan #: 770-779		Scan #: 977-984		Scan #: 1009-1019		Scan #: 711-716		Scan #: 302-306		Scan #: 262-264		Scan #: 469-471		Scan #: 393-396		Scan #: 393-396		Scan #: 300-305		Scan #: 470-475		Scan #: 716-719		Scan #: 351-354		Scan #: 453-456		Scan #: 591-594		Scan #: 352-354		Scan #: 407-414		Scan #: 407-414		Scan #: 640-643		Scan #: 693-701		Scan #: 692-699		Scan #: 757-761		Scan #: 830
RT: 2.35-2.38		RT: 3.32-3.35		RT: 3.59-3.63		RT: 4.56-4.59		RT: 4.71-4.76		RT: 3.32-3.34		RT: 1.40-1.42		RT: 1.22-1.23		RT: 2.18-2.19		RT: 1.83-1.84		RT: 1.83-1.84		RT: 1.39-1.42		RT: 2.21-2.24		RT: 3.36-3.38		RT: 1.66-1.67		RT: 2.13-2.15		RT: 2.78-2.79		RT: 1.66-1.67		RT: 1.90-1.93		RT: 1.90-1.93		RT: 2.99-3.00		RT: 3.24-3.28		RT: 3.23-3.27		RT: 3.54-3.56		RT: 3.88
AV: 8		AV: 6		AV: 10		AV: 8		AV: 11		AV: 6		AV: 5		AV: 3		AV: 3		AV: 4		AV: 4		AV: 6		AV: 6		AV: 4		AV: 4		AV: 4		AV: 4		AV: 3		AV: 8		AV: 8		AV: 4		AV: 9		AV: 8		AV: 5		SB: 74 0.94-1.20 , 2.39-2.47
SB: 101 0.34-0.71 , 4.83-4.93		SB: 101 0.34-0.71 , 4.83-4.93		SB: 101 0.34-0.71 , 4.83-4.93		SB: 101 0.34-0.71 , 4.83-4.93		SB: 101 0.34-0.71 , 4.83-4.93		SB: 101 0.34-0.71 , 4.83-4.93		SB: 101 2.41-2.64 , 0.07-0.31		SB: 101 2.41-2.64 , 0.07-0.31		SB: 101 2.41-2.64 , 0.07-0.31		SB: 101 2.41-2.64 , 0.07-0.31		SB: 101 2.41-2.64 , 0.07-0.31		SB: 101 2.41-2.64 , 0.07-0.31		SB: 19 3.49-3.53 , 2.68-2.71		SB: 19 3.49-3.53 , 2.68-2.71		SB: 19 3.49-3.53 , 2.68-2.71		SB: 19 3.49-3.53 , 2.68-2.71		SB: 19 3.49-3.53 , 2.68-2.71		SB: 19 3.49-3.53 , 2.68-2.71		SB: 99 4.05-4.21 , 1.10-1.40		SB: 99 4.05-4.21 , 1.10-1.40		SB: 99 4.05-4.21 , 1.10-1.40		SB: 99 4.05-4.21 , 1.10-1.40		SB: 99 4.05-4.21 , 1.10-1.40		SB: 99 4.05-4.21 , 1.10-1.40		Mass defect: 0.00 @ 1.00, 300.00 @ 1000.00
Mass defect: 0.00 @ 1.00, 300.00 @ 1000.00		Mass defect: 0.00 @ 1.00, 300.00 @ 1000.00		Mass defect: 0.00 @ 1.00, 300.00 @ 1000.00		Mass defect: 0.00 @ 1.00, 300.00 @ 1000.00		Mass defect: 0.00 @ 1.00, 300.00 @ 1000.00		Mass defect: 0.00 @ 1.00, 300.00 @ 1000.00		Mass defect: 0.00 @ 1.00, 300.00 @ 1000.00		Mass defect: 0.00 @ 1.00, 300.00 @ 1000.00		Mass defect: 0.00 @ 1.00, 300.00 @ 1000.00		Mass defect: 0.00 @ 1.00, 300.00 @ 1000.00		Mass defect: 0.00 @ 1.00, 300.00 @ 1000.00		Mass defect: 0.00 @ 1.00, 300.00 @ 1000.00		Mass defect: 0.00 @ 1.00, 300.00 @ 1000.00		Mass defect: 0.00 @ 1.00, 300.00 @ 1000.00		Mass defect: 0.00 @ 1.00, 300.00 @ 1000.00		Mass defect: 0.00 @ 1.00, 300.00 @ 1000.00		Mass defect: 0.00 @ 1.00, 300.00 @ 1000.00		Mass defect: 0.00 @ 1.00, 300.00 @ 1000.00		Mass defect: 0.00 @ 1.00, 300.00 @ 1000.00		Mass defect: 0.00 @ 1.00, 300.00 @ 1000.00		Mass defect: 0.00 @ 1.00, 300.00 @ 1000.00		Mass defect: 0.00 @ 1.00, 300.00 @ 1000.00		Mass defect: 0.00 @ 1.00, 300.00 @ 1000.00		Mass defect: 0.00 @ 1.00, 300.00 @ 1000.00		Data points: 249
Data points: 229		Data points: 246		Data points: 245		Data points: 235		Data points: 281		Data points: 245		Data points: 248		Data points: 228		Data points: 235		Data points: 273		Data points: 273		Data points: 238		Data points: 247		Data points: 199		Data points: 233		Data points: 224		Data points: 215		Data points: 225		Data points: 244		Data points: 244		Data points: 244		Data points: 226		Data points: 222		Data points: 238		Mass	Intensity
Mass	Intensity	Mass	Intensity	Mass	Intensity	Mass	Intensity	Mass	Intensity	Mass	Intensity	Mass	Intensity	Mass	Intensity	Mass	Intensity	Mass	Intensity	Mass	Intensity	Mass	Intensity	Mass	Intensity	Mass	Intensity	Mass	Intensity	Mass	Intensity	Mass	Intensity	Mass	Intensity	Mass	Intensity	Mass	Intensity	Mass	Intensity	Mass	Intensity	Mass	Intensity	Mass	Intensity	70	2427
70	1976	70	2035	70	1355	70	2059	70	1980	70	2067	70	5397	70	3416	70	3163	68	29	68	29	70	4922	70	3398	68	65	70	1895	70	1879	70	2573	70	1627	70	2954	70	2954	70	1128	70	2587	70	2353	70	2260	74	8930
74	9443	74	11273	72	82	74	7238	72	44	74	10498	72	274	72	43	72	704	70	2277	70	2277	72	259	72	96	70	1887	72	957	72	348	72	434	72	764	74	14414	74	14414	72	155	72	179	72	48	72	664	76	49616
76	45153	76	55056	74	337	76	45615	74	3522	76	57451	74	11977	74	15803	74	17872	74	2808	74	2808	74	12307	74	21935	74	8146	74	7328	74	2034	74	4722	74	8827	76	42572	76	42572	74	12429	74	17157	74	18089	74	21395	78	14640
77	2162	77	1816	76	48094	77	504	76	43944	77	2686	76	48754	76	46763	76	45143	76	27985	76	27985	76	50993	76	40776	76	54517	76	33002	76	57979	76	56699	76	32363	77	2146	77	2146	76	43840	76	48752	76	49806	76	51239	79	1163
78	13591	78	17023	77	1467	78	17713	77	1168	78	17612	78	13778	77	927	77	672	78	6848	78	6848	77	1753	77	2186	77	2850	78	9249	77	2356	77	2610	78	9063	78	14308	78	14308	77	372	77	2493	77	2376	77	1658	80	2257
80	3275	80	3417	78	15254	80	2277	78	13236	80	3175	79	789	78	11449	78	10862	80	1473	80	1473	78	14836	78	14695	78	12106	80	2301	78	16013	78	12538	80	2327	79	1508	79	1508	78	9852	78	13363	78	13555	78	16140	86	198
91	108390	90	2411	80	2312	91	60461	80	1862	91	71075	80	4668	79	1137	79	233	91	132669	91	132669	79	535	80	3906	80	3803	91	75949	79	415	80	4310	91	74889	80	4200	80	4200	80	3506	79	671	79	181	80	4320	91	52938
92	5752	91	65295	91	74161	92	2541	91	96284	92	3426	86	47	80	4160	80	2328	92	6316	92	6316	80	5099	91	73109	91	127278	92	2436	80	5165	91	72647	92	2156	86	121	86	121	86	1	80	3913	80	4070	86	20	92	3665
93	4076	92	3303	92	2858	93	1852	92	4710	93	1123	91	81122	86	894	91	127601	96	2362	96	2362	91	81575	92	3480	92	5844	100	252	91	24134	92	3990	102	24489	91	83112	91	83112	91	105901	91	125424	91	124972	91	42822	96	3920
96	3402	93	643	93	460	96	1491	93	2936	96	1168	92	4504	91	72071	92	6164	102	856	102	856	92	4421	96	1440	96	1939	102	19972	92	1203	96	1123	104	4342	92	4747	92	4747	92	3842	92	6253	92	6294	92	1628	100	747
102	4242	96	2115	96	2246	100	84	96	2480	100	546	96	3960	92	3636	96	3971	104	3087	104	3087	96	3430	100	605	100	405	104	4102	96	1754	100	84	106	2704	96	6517	96	6517	96	6270	96	5714	96	5412	96	4896	102	11888
104	3946	100	380	100	983	102	19494	102	9709	102	17361	100	723	96	3192	102	44623	106	3073	106	3073	100	337	102	27622	102	7002	106	2915	100	1328	102	5560	108	164900	100	1130	100	1130	102	34921	100	931	100	770	100	249	104	7843
106	2551	102	19828	102	1020	104	4253	104	4341	104	4832	102	15070	102	23969	104	6614	108	161546	108	161546	102	11882	104	5277	104	4456	108	167674	102	6454	104	4822	109	4405	102	22220	102	22220	104	7760	102	23087	102	22183	102	45339	106	4485
108	172766	104	5560	104	4994	106	2536	106	2873	106	3117	104	9372	104	7532	106	3132	109	6349	109	6349	104	8414	106	4776	106	4188	109	4228	104	6006	106	4612	110	14903	104	8573	104	8573	106	2459	104	6294	104	6309	104	8051	108	180353
109	5708	106	3186	106	2506	108	195234	108	204731	108	221763	106	5475	106	4608	108	186835	110	9075	110	9075	106	4901	108	220384	108	250552	110	15255	106	3093	108	210441	112	12517	105	378	105	378	108	183100	106	3405	106	3533	106	4068	109	4825
110	32528	108	220431	108	198510	109	6732	109	7635	109	6879	108	182225	108	143633	109	6823	112	8037	112	8037	108	173744	109	6940	109	9527	112	12193	108	176154	109	5815	114	3	106	3646	106	3646	109	5100	108	226092	108	223335	108	199485	110	28094
112	7576	109	6893	109	7547	110	40730	110	34809	110	44388	109	6640	109	6525	110	18484	117	11967	117	11967	109	6483	110	25111	110	29812	114	302	109	3641	110	31410	118	6054	108	199437	108	199437	110	12220	109	7232	109	7230	109	6151	112	15205
114	790	110	44949	110	37393	112	10277	112	10504	112	13541	110	16877	110	21395	112	8563	118	9323	118	9323	110	20031	112	16449	112	19016	118	7230	110	33614	112	16600	124	12124	109	5666	109	5666	112	11997	110	21346	110	22604	110	22939	114	545
117	12248	112	13248	112	11649	114	1723	114	251	114	964	112	11742	112	6819	114	1501	120	314	120	314	112	11543	114	1993	114	1941	124	12209	112	18609	114	887	132	4877	110	17251	110	17251	114	1275	112	14643	112	13510	112	14664	118	9401
118	7671	114	698	114	549	117	3856	117	8005	117	3557	114	1610	114	107	117	2381	124	11212	124	11212	114	1326	118	11110	117	3618	132	5515	114	1623	118	9787	135	283754	112	15418	112	15418	116	64	114	2078	114	1467	114	1487	123	872
123	1655	117	2337	117	9118	118	7218	118	8548	118	9430	118	13991	116	553	118	10505	128	714	128	714	117	1014	124	18279	118	9588	135	282974	118	9899	124	16448	136	15880	114	1072	114	1072	118	8592	117	6235	117	6378	118	10077	124	18515
124	26682	118	9128	118	7286	123	82	123	893	123	487	124	22194	118	14441	120	39	132	3848	132	3848	118	14613	126	120	123	59	136	15627	124	14989	126	740	138	2974	117	3667	117	3667	123	1219	118	9930	118	9472	124	18393	126	1058
126	543	123	48	123	2	124	20489	124	15263	124	24160	127	1874	123	204	123	1946	135	378021	135	378021	124	20988	132	8349	124	13758	138	4218	132	8842	132	8929	142	64	118	9889	118	9889	124	13370	123	857	123	529	130	297	132	9729
132	5865	124	23336	124	18184	126	480	132	6936	126	424	128	1409	124	18962	124	16603	136	22766	136	22766	128	955	135	232846	126	560	144	4289	134	3619	135	223285	144	4042	123	833	123	833	126	564	124	16056	124	15781	132	8503	135	329309
135	396123	126	537	126	183	132	5870	135	334450	132	8722	130	61	126	75	128	422	138	2137	138	2137	130	283	136	13436	132	8863	146	1105	135	192677	136	14570	146	1272	124	18430	124	18430	132	6937	132	7845	132	7709	135	244725	136	20869
136	27527	132	8643	132	7273	135	325425	136	21589	135	298243	132	10517	127	3337	132	7108	142	149	142	149	132	10294	138	4595	135	262943	152	1909954	136	10609	138	3008	152	1918248	132	8412	132	8412	135	284652	135	355131	135	348162	136	13047	138	4597
138	2395	135	294687	135	321410	136	20165	138	2651	136	19645	135	312591	128	989	135	350506	144	7740	144	7740	135	286072	144	7970	136	17198	153	118755	138	5266	142	105	153	120667	135	328481	135	328481	136	18676	136	22231	136	22083	138	4252	144	5486
144	4505	136	19055	136	20164	138	2490	144	3254	138	2849	136	20668	132	9050	136	21363	146	433	146	433	136	19603	146	1189	138	4118	154	10031	144	7653	144	6691	154	9131	136	20059	136	20059	138	2630	138	4260	138	3602	144	5981	146	1364
146	671	138	2703	138	2640	144	3562	146	1030	144	5446	138	2737	135	301896	138	2346	150	1643	150	1643	138	2707	148	1907	142	209	156	4403	146	1846	146	824	156	4465	138	4969	138	4969	144	4403	144	5104	144	5183	146	1475	148	1823
148	1310	144	5747	144	4224	146	1144	148	2421	146	1875	144	16232	136	19104	142	33	152	1918706	152	1918706	144	15735	150	516	144	5349	158	6817	148	16	148	1153	158	8560	144	6157	144	6157	146	299	146	1095	146	1127	148	2546	152	2087166
152	1932446	146	1715	146	1000	148	2293	150	1067	148	2719	146	3730	138	2756	144	12354	153	111579	153	111579	146	3690	152	2002425	146	1174	160	3949	150	492	152	1644275	160	3249	146	692	146	692	148	1951	148	1084	148	896	150	1244	153	116958
153	111912	148	2155	148	2127	152	2063188	152	2024043	150	1423	148	337	142	260	146	642	154	12491	154	12491	148	376	153	109082	150	1028	162	5245	152	1674625	153	94745	162	5000	148	1816	148	1816	150	4	150	1100	150	921	152	1940942	154	9817
154	11728	150	1052	150	1608	153	122450	153	114513	152	2017871	150	1877	144	16052	150	461	156	3492	156	3492	150	2051	154	9838	152	1787184	166	2342	153	95043	154	6936	166	2000	150	508	150	508	152	1623909	152	2005898	152	1834872	153	110071	156	7065
156	4284	152	2014747	152	1911362	154	12413	154	13058	153	120246	152	1962450	146	2362	152	1749249	158	2347	158	2347	152	1803154	156	6018	153	100118	167	18271	154	6459	156	8162	167	18206	152	1936216	152	1936216	153	93026	153	119248	153	105764	154	12295	158	6337
158	1806	153	120147	153	112433	156	3757	156	5053	154	12764	153	112920	148	753	153	98600	160	5021	160	5021	153	98736	158	11606	154	8625	168	2093	156	7083	158	3097	168	2386	153	110256	153	110256	154	8485	154	12444	154	10946	156	4629	160	9567
160	5068	154	13033	154	11614	158	6936	158	3770	156	5410	154	10952	150	905	154	7776	162	5339	162	5339	154	9473	160	6129	156	7234	170	1271	158	2313	160	6146	170	742	154	11192	154	11192	156	2874	156	5557	156	5723	158	14118	162	6257
162	6636	156	5181	156	4741	160	4642	160	5076	158	5258	156	6585	152	1596747	156	5259	166	5077	166	5077	156	7627	162	7565	158	3460	172	9691	160	7016	162	7401	172	8836	156	4752	156	4752	158	11703	158	8272	158	7625	160	6645	166	11978
166	5588	158	6174	158	954	162	6666	162	7955	160	6439	158	7316	153	87189	158	12566	167	22440	167	22440	158	6125	166	5173	160	5121	174	5311	162	8186	166	4979	174	5111	158	7793	158	7793	160	5321	160	5832	160	5862	162	8060	167	20789
167	29848	160	6315	160	4864	166	8740	166	8101	162	9278	160	7289	154	6287	160	5750	168	2775	168	2775	160	7335	167	9501	162	7713	176	1764	166	3446	167	8989	176	1886	160	5897	160	5897	162	5455	162	5279	162	5837	166	6432	168	2140
168	3647	162	8502	162	8084	167	14480	167	16368	166	6391	162	6120	156	4076	162	5386	169	1671	169	1671	162	6751	168	2049	166	5528	177	2737	167	6829	168	2020	177	1018	162	6247	162	6247	166	11257	167	30528	166	5882	167	11713	170	2337
170	2136	166	6317	166	5036	168	2880	168	2815	167	12231	166	6732	158	8934	166	11512	170	1543	170	1543	166	6707	170	1859	167	13290	178	3318	168	2054	170	2796	178	2779	166	7249	166	7249	167	15520	168	2203	167	23215	168	1832	172	13151
172	10279	167	12896	167	16884	170	2757	170	3093	168	2409	167	19728	160	7797	167	23577	172	17034	172	17034	167	14630	172	15967	168	2150	180	4990	170	4077	172	13665	180	5429	167	20111	167	20111	168	2776	170	2140	168	2226	170	1630	174	5250
174	3426	168	2472	168	2056	172	9519	172	8538	170	3153	168	3615	162	7038	168	2786	174	3235	174	3235	168	2940	174	6060	170	2856	186	15121	172	13436	174	5173	184	147	168	2130	168	2130	170	2780	172	12052	170	2773	172	11881	176	4249
176	2021	170	2956	170	2581	174	4188	174	4283	172	11314	169	2246	166	11298	170	2579	176	2209	176	2209	169	1588	176	3067	172	10429	188	2614	174	3782	176	1898	186	13743	170	2146	170	2146	172	10120	174	5107	172	11725	174	5701	177	6575
177	3918	172	11968	172	8205	176	2341	176	2454	174	4911	170	2795	167	13791	172	18009	177	24529	177	24529	170	2948	177	12385	174	4636	190	4144	176	2119	177	13482	188	2686	172	14805	172	14805	174	5044	176	2061	174	5248	176	2959	178	3574
178	2559	174	5154	174	3610	177	1995	177	5789	176	2634	172	26271	168	2178	174	4587	178	5208	178	5208	172	24378	178	4393	176	1661	192	1884	177	3783	178	3998	190	3604	174	6159	174	6159	176	2225	177	5759	176	1901	177	2456	180	4187
180	3945	176	2715	176	2438	178	2843	178	2605	177	2279	174	5961	169	4582	176	3654	180	3517	180	3517	174	5733	180	6254	177	7445	193	625	178	3886	180	2806	192	1922	176	2800	176	2800	177	3024	178	2559	177	6354	178	3804	184	673
186	15771	177	3298	177	4081	180	4054	180	5202	178	2734	176	5438	170	3455	177	29444	182	1532	182	1532	176	4114	182	465	178	4173	195	112393	180	3156	186	18290	193	406	177	4712	177	4712	178	2685	180	3652	178	2357	180	6505	186	17463
188	4629	178	2765	178	2794	182	228	182	597	180	3985	177	38531	172	26924	178	6053	186	25302	186	25302	177	31945	184	342	180	2731	196	12111	182	81	188	4934	195	113888	178	3156	178	3156	180	4299	182	103	180	2932	182	331	188	6862
190	4188	180	4345	180	2937	186	15745	186	12553	182	328	178	6664	174	5922	180	4818	187	79	187	79	178	6058	186	24345	182	383	198	3513	186	17095	190	5228	196	11274	180	4760	180	4760	182	232	186	15983	182	123	184	748	190	4560
192	2549	182	242	182	292	188	4727	188	4136	186	14954	180	6055	176	3012	182	453	188	3622	188	3622	180	4834	188	4991	186	17003	200	444	188	4433	192	1924	198	3490	182	245	182	245	186	14837	188	4869	186	16723	186	22640	192	4718
193	593	184	49	186	13339	190	5614	190	4835	188	4576	182	381	177	37712	186	25507	190	4341	190	4341	182	506	190	5524	188	3504	202	3312	190	5226	193	840	200	240	186	21258	186	21258	188	4199	190	4243	188	5043	188	5747	193	738
195	163000	186	14906	188	4186	192	2199	192	2319	190	5391	186	42344	178	6020	188	4555	192	2053	192	2053	186	38960	192	2705	190	4555	204	3632	192	1841	195	167740	202	3206	188	4953	188	4953	190	4573	192	2645	190	4590	190	5909	195	213586
196	19345	188	4668	190	4417	193	708	193	278	192	2087	187	1410	180	4211	190	4860	193	1904	193	1904	187	167	193	616	192	1616	206	133	193	224	196	21020	204	3941	190	5178	190	5178	192	2119	193	912	192	2459	192	3036	196	22970
200	96	190	5130	192	2323	195	150530	195	135737	193	756	188	5861	182	567	192	2406	195	87033	195	87033	188	5704	195	140292	193	328	208	615	195	195550	200	237	206	469	192	2606	192	2606	193	67	195	158828	193	940	193	391	200	1072
202	3389	192	1820	193	1011	196	18403	196	15950	195	162772	190	6894	186	39531	193	1810	196	13677	196	13677	190	6569	196	17258	195	158423	210	2257	196	21513	202	3083	208	698	193	1348	193	1348	195	136509	196	19467	195	161760	195	182105	202	6156
204	4145	193	775	195	142784	200	577	198	4984	196	19329	192	2761	187	2519	195	163362	198	3501	198	3501	192	2861	198	615	196	15756	211	24506	202	4073	204	2300	210	2046	195	163239	195	163239	196	17030	202	2438	196	20185	196	22122	204	3698
208	936	195	158659	196	15949	202	3646	200	362	200	1119	193	2273	188	6038	196	22139	200	43	200	43	193	2090	200	1525	200	985	212	108460	204	3090	208	464	211	20240	196	19986	196	19986	198	935	204	2685	202	2552	198	875	206	142
210	2678	196	18734	200	357	204	3608	202	3767	202	3725	195	201664	190	5214	200	501	201	19	201	19	195	205191	202	3480	202	2172	213	14229	208	1003	210	3316	212	102209	198	266	198	266	200	671	208	466	204	2300	200	329	208	2254
211	22675	200	978	202	3439	208	854	204	4003	204	4240	196	24574	192	2753	202	2594	202	2191	202	2191	196	26130	204	5632	204	1981	214	1123	210	2509	211	22261	213	12054	202	3524	202	3524	202	3404	210	2797	208	443	202	5013	210	2468
212	105556	202	3681	204	3426	210	2163	206	335	208	383	198	1429	193	1871	204	5089	204	3799	204	3799	198	297	206	928	208	373	216	1747	211	42416	212	175813	214	817	204	3889	204	3889	204	3083	212	158978	210	2675	204	6311	212	164303
213	12707	204	4362	206	68	212	137928	208	1036	210	3226	200	826	195	225279	208	576	206	290	206	290	200	826	208	912	210	2142	218	359	212	159381	213	21724	216	2715	208	1154	208	1154	206	26	213	15705	212	163094	206	1127	213	11749
214	1567	208	286	208	727	213	11532	210	2375	212	147680	202	3903	196	31981	210	2032	208	703	208	703	202	3585	210	2248	212	179382	223	35971	213	21271	214	3280	223	34211	210	3001	210	3001	208	1280	214	2117	213	16667	208	797	214	1108
216	679	210	3151	210	2704	214	2128	211	14567	213	13297	204	6246	202	4480	211	28459	210	1584	210	1584	204	6073	211	33753	213	17338	224	7065	214	2713	218	376	224	6911	212	151712	212	151712	210	1954	218	507	214	2014	210	2492	216	13492
218	1027	212	153525	211	5778	216	643	212	102156	214	1154	208	1101	204	6308	212	252181	211	15011	211	15011	208	1082	212	157302	214	1342	225	460	218	1897	220	387	225	243	213	15451	213	15451	212	138495	222	5200	218	732	211	36227	218	2823
222	2067	213	12982	212	121052	218	1788	213	13200	216	2426	210	3961	206	168	213	39673	212	201037	212	201037	210	3489	213	20934	218	1518	226	306	222	871	223	60482	226	88	214	1659	214	1659	213	12111	223	24965	222	4768	212	124926	220	396
223	15239	214	1175	213	13599	222	3688	214	2166	218	1514	211	19336	208	737	214	4041	213	31204	213	31204	211	33053	214	2313	222	2891	227	609	223	12598	224	11787	228	5067	218	581	218	581	214	1662	224	7197	223	21729	213	14849	222	5918
224	5395	216	2747	214	1587	223	18181	216	1952	220	456	212	343194	210	1380	216	15110	214	2805	214	2805	212	305881	218	2474	223	65343	228	4958	224	3999	226	326	230	2405	222	2247	222	2247	218	345	225	417	224	6682	214	2112	223	68322
225	2077	218	1437	216	1993	224	6000	218	2117	222	3041	213	52466	211	20960	218	742	216	15126	216	15126	213	48474	220	667	224	11178	230	2619	226	592	228	7362	231	1982	223	33298	223	33298	222	701	226	696	225	874	218	1322	224	13151
226	1275	220	260	218	1811	226	630	220	54	223	18079	214	5637	212	338542	222	2292	218	1346	218	1346	214	4801	223	84462	225	397	231	2955	228	6258	230	3316	232	4929	224	7206	224	7206	223	20573	228	6816	226	502	222	5292	225	324
227	1668	222	2202	220	128	227	160	222	239	224	5579	216	16442	213	56458	223	66249	220	490	220	490	216	16682	224	11372	226	752	232	4742	230	2650	231	6088	233	4638	226	1170	226	1170	224	4589	229	683	228	6887	223	28163	226	1488
228	5688	223	20872	222	3288	228	6880	223	28099	226	1384	218	1947	214	6005	224	13402	223	63355	223	63355	218	2004	226	944	228	6591	233	5405	231	3578	232	8028	234	19254	228	6917	228	6917	226	743	230	2972	229	657	224	6473	227	1512
229	691	224	6150	223	10443	229	137	224	7071	227	12	220	1228	216	17913	225	724	224	10739	224	10739	220	740	227	462	230	2115	234	18729	232	7382	233	9893	235	307	229	532	229	532	228	6947	231	7229	230	2861	226	1119	228	5412
230	2606	226	1314	224	5218	230	2890	225	1344	228	7126	222	755	218	2062	226	1511	225	2842	225	2842	222	1323	228	7183	231	6242	235	253	233	9559	234	21709	236	1919	230	2695	230	2695	230	3040	232	7526	231	7779	228	7589	230	4928
231	6691	227	21	225	185	231	5844	226	1303	229	1079	223	128310	223	103884	227	993	226	1456	226	1456	223	101825	229	35	232	5725	236	1825	234	26068	235	1911	238	2780	231	5425	231	5425	231	4261	233	5919	232	7987	230	2979	231	6522
232	6316	228	7079	226	941	232	7163	227	903	230	3487	224	19209	224	17347	228	6804	227	1587	227	1587	224	16068	230	2990	233	2241	238	2786	235	1838	236	2511	239	790	232	7683	232	7683	232	6765	234	23745	234	35959	231	4244	232	5853
233	5231	229	1006	227	781	233	3561	228	6289	231	7255	225	1052	225	1224	229	1143	228	6304	228	6304	225	657	231	5988	234	26970	239	725	236	2189	238	2849	240	9616	233	5612	233	5612	234	30350	235	1470	235	1696	232	7454	233	3077
234	20812	230	3595	228	7148	234	22904	229	390	232	7981	226	1475	226	764	230	3755	229	1670	229	1670	226	1402	232	6911	235	2759	240	11177	238	2137	239	1819	242	2484	234	22793	234	22793	235	1352	236	1967	236	1921	233	3132	234	28381
235	1179	231	6998	229	1039	235	1233	230	3650	234	32052	227	1451	227	606	231	9084	230	2587	230	2587	227	2065	234	33589	236	1577	242	2645	240	11871	240	14884	244	6572	235	1343	235	1343	236	2297	238	1679	238	1797	234	26242	235	1671
236	1889	232	8110	230	3107	236	2250	231	6519	235	3282	228	7444	228	7794	232	6432	231	4052	231	4052	228	6272	235	2309	238	2698	244	6645	242	3599	241	950	246	1560	236	1977	236	1977	238	2660	239	1732	239	1359	235	1875	236	3085
238	2088	234	32260	231	7249	238	2084	232	8021	236	2246	229	918	229	1700	233	11401	232	6260	232	6260	229	979	236	2673	239	5662	246	1277	244	8485	242	2907	248	2400	238	1972	238	1972	240	10266	240	11236	240	10984	236	2731	238	2277
239	811	235	3415	232	7164	240	12887	234	29824	238	3178	230	4179	230	5082	234	16232	233	891	233	891	230	4090	238	2411	240	9000	247	247	245	341	244	7809	252	584	239	611	239	611	241	441	241	315	241	132	238	2730	239	2520
240	11370	236	2284	233	2646	241	495	235	2828	239	1933	231	8016	231	8572	235	3669	234	22644	234	22644	231	6738	239	990	241	127	248	2830	246	1836	245	62	254	1761	240	13433	240	13433	242	3027	242	3009	242	2947	239	2587	240	15387
242	3494	238	3041	234	23658	242	3527	236	2323	240	10879	232	9309	232	10414	236	2378	235	1685	235	1685	232	9028	240	18601	242	3961	252	819	247	745	246	1749	256	2602	241	153	241	153	244	7677	244	8296	244	7969	240	11981	242	3998
244	9625	239	2157	235	2613	244	10439	238	2248	241	403	233	3916	233	7467	238	2129	236	1107	236	1107	233	2748	241	75	244	7036	254	1984	248	2916	247	686	258	1310	242	2908	242	2908	245	824	245	617	245	541	242	2986	244	8684
245	782	240	10860	236	1896	245	1417	239	1316	242	4256	234	29828	234	26698	240	17924	238	1443	238	1443	234	32526	242	2891	246	1562	256	2090	250	159	248	4185	260	947	244	8584	244	8584	246	1945	246	1975	246	1796	244	8194	245	1086
246	1592	241	505	238	2926	246	2074	240	9264	243	695	235	3635	235	2397	241	1958	239	4100	239	4100	235	2687	244	9757	247	413	258	1456	252	1355	249	2276	262	2143	245	761	245	761	247	632	247	596	247	770	245	380	246	2535
247	1121	242	4095	239	1471	247	1183	241	523	244	10151	236	3616	236	2579	242	2369	240	10988	240	10988	236	3269	245	893	248	3028	260	1131	254	2206	250	1370	264	212	246	1608	246	1608	248	2726	248	4217	248	4200	246	2314	247	750
248	3331	243	342	240	10282	248	3875	242	3624	245	749	238	2789	238	2465	243	431	241	259	241	259	238	2496	246	2272	249	727	262	2087	256	2754	252	2084	266	33983	247	859	247	859	249	1093	249	3559	249	3521	247	670	248	1908
249	3618	244	10266	241	209	249	1941	244	10361	246	1631	240	29556	239	5391	244	8160	242	3586	242	3586	240	26309	247	313	250	176	264	318	258	1466	254	2582	267	5615	248	3343	248	3343	250	371	250	685	250	673	248	3649	249	1522
250	956	245	863	242	3732	250	1112	245	687	247	1581	241	2044	240	18603	245	1599	244	9007	244	9007	241	1683	248	3334	252	1387	266	40614	260	1398	256	3057	268	5830	249	1703	249	1703	252	1567	252	1689	252	1761	249	266	252	1341
252	1781	246	1581	244	10761	252	1716	246	1280	248	3983	242	2482	241	1168	246	2350	245	1013	245	1013	242	2015	249	2196	254	1767	267	7706	261	219	258	1871	269	8414	250	488	250	488	254	1461	254	2215	254	2082	252	939	254	3076
254	2540	247	1156	245	1045	254	3182	247	987	249	3306	244	12090	242	2972	247	1615	246	1701	246	1701	244	11443	250	766	256	2117	268	5695	262	2302	260	1176	270	1610	252	1438	252	1438	256	3287	256	2672	256	2833	254	3003	256	4459
256	2961	248	3496	246	1713	256	3765	248	4080	250	944	245	1188	244	11000	248	2167	247	711	247	711	245	1004	252	1146	258	1516	269	8760	263	13	261	521	272	613	254	2698	254	2698	258	2187	258	1821	258	1633	256	2768	258	1888
258	2111	249	3268	247	1186	258	1856	249	4626	252	1028	246	2309	245	838	249	4950	248	2066	248	2066	246	1990	254	2258	260	1015	270	1970	264	354	262	880	273	138	256	3753	256	3753	260	735	260	1111	260	1403	258	2563	260	1325
260	1003	250	675	248	4768	260	1184	250	1300	254	2738	247	972	246	2214	250	366	249	2509	249	2509	247	864	255	163	262	1030	272	582	265	2970	263	95	274	242	258	1638	258	1638	261	701	262	2990	262	2454	260	1321	261	485
262	1565	252	1360	249	3632	261	37	252	1399	255	223	248	3885	247	1173	252	1650	250	349	250	349	248	3959	256	2567	264	151	273	408	266	53112	264	661	276	1136	260	1297	260	1297	262	2506	263	510	263	380	261	80	262	2275
263	590	254	2775	250	1276	262	2584	254	2365	256	4529	249	3779	248	3820	254	2197	252	1205	252	1205	249	2303	258	1828	265	2813	274	386	267	10805	265	1710	279	100862	261	2	261	2	264	422	264	601	264	579	262	2343	264	566
264	651	256	4405	252	2122	263	225	256	3852	258	2415	250	444	249	5119	256	3633	254	2663	254	2663	250	150	260	1069	266	48367	276	1314	268	6432	266	65006	280	16518	262	2387	262	2387	265	1106	265	2235	265	2684	263	289	265	4688
265	4039	258	2130	254	2241	264	986	257	21	260	1364	252	1919	250	1593	258	1712	256	2696	256	2696	252	1685	261	236	267	10892	279	82998	269	4556	267	11899	281	2705	263	180	263	180	266	40801	266	56505	266	56854	264	771	266	45440
266	39449	260	1378	256	4094	265	2854	258	1798	261	238	254	3163	252	1335	259	126	258	2246	258	2246	254	3329	262	2028	268	5899	280	13717	270	1436	268	7704	282	1632	264	641	264	641	267	9093	267	12338	267	12807	265	263	267	11430
267	9020	261	403	258	2023	266	53361	260	1245	262	2203	256	3822	254	2998	260	1523	260	1159	260	1159	255	34	263	51	269	7394	281	2061	272	717	269	5413	284	765	265	5694	265	5694	268	4835	268	6301	268	6019	266	55603	268	6869
268	9583	262	2196	260	1323	267	11045	261	261	263	370	257	89	255	726	261	509	262	1747	262	1747	256	3352	264	755	270	1918	282	1650	273	774	270	1237	286	858	266	47994	266	47994	269	8359	269	11154	269	9419	267	10928	269	9885
269	12980	263	550	261	215	268	6704	262	1976	264	1054	258	2259	256	3321	262	2531	263	971	263	971	257	115	265	1551	274	835	284	647	274	441	272	981	288	4878	267	10468	267	10468	270	1078	270	2350	270	2395	268	7740	270	2899
270	3146	264	870	262	2103	269	10592	263	960	265	2455	260	1699	258	1187	263	389	264	443	264	443	258	1884	266	62035	276	886	286	1182	276	2260	273	1073	289	287	268	7080	268	7080	272	511	273	442	273	431	269	7015	272	123
272	1142	265	1507	263	522	270	2793	264	753	266	57435	262	3239	260	1234	264	717	265	5382	265	5382	260	1477	267	12690	279	65863	288	4890	279	78450	274	954	290	737	269	10814	269	10814	273	731	274	658	274	637	270	2231	273	544
273	1121	266	58478	264	715	272	16	266	53682	267	12163	263	365	261	302	265	6816	266	29188	266	29188	262	2904	268	7261	280	12809	289	319	280	16449	276	1886	291	1878	270	2605	270	2605	274	653	276	1652	276	1711	272	871	274	953
274	1178	267	12031	265	1338	273	1151	267	10812	268	7658	264	1056	262	2222	266	46212	267	6111	267	6111	263	478	269	8170	281	1146	290	891	281	1773	279	60528	292	1913	272	1343	272	1343	275	12	279	74694	279	70504	273	412	275	706
276	1797	268	7732	266	59503	274	1463	268	7034	269	8753	265	4977	263	67	267	11087	268	7605	268	7605	264	935	270	2101	282	2001	291	2645	282	1807	280	15177	293	1225	273	857	273	857	276	1540	280	11672	280	11303	274	999	276	1829
279	113677	269	8829	267	12520	276	2362	269	11379	270	2667	266	55083	264	660	268	6778	269	12542	269	12542	265	1883	272	1269	284	957	292	1929	284	928	281	853	294	4258	274	832	274	832	279	125367	281	654	281	969	276	1663	279	110288
280	19528	270	2615	268	7206	279	140925	270	2714	272	1630	267	13195	265	5451	269	9365	270	3056	270	3056	266	54256	273	542	286	402	293	993	286	367	282	1184	295	1634	276	1754	276	1754	280	20160	282	1590	282	1596	279	357471	280	19278
281	2258	272	1958	269	10293	280	24640	272	1478	273	1865	268	6387	266	51703	270	2814	272	1044	272	1044	267	12534	274	606	288	4379	294	4029	288	5209	284	2261	296	26204	279	138303	279	138303	281	1563	284	1165	284	1235	280	60734	281	1249
282	1829	273	1789	270	2882	281	2684	273	1328	274	1231	269	7962	267	12200	272	740	273	795	273	795	268	6503	275	1697	289	619	295	2404	289	105	286	684	302	1045	280	25605	280	25605	282	1109	286	538	286	454	281	6965	282	710
284	1495	274	1059	272	774	282	2054	274	1187	276	2081	270	2379	268	8129	273	815	274	876	274	876	269	7148	276	1575	290	2487	296	24539	290	1773	288	4722	304	10765	281	2951	281	2951	284	965	288	4308	288	4631	282	2977	284	561
285	224	276	2052	273	1327	284	1601	276	1888	279	163658	272	650	269	7817	274	794	275	100	275	100	270	2153	279	267107	291	1739	298	712	291	2428	289	607	305	1726	282	1732	282	1732	286	427	289	630	289	480	284	1416	286	84
286	840	279	161346	274	1129	286	1124	279	99873	280	28116	273	984	270	1586	276	1839	276	1545	276	1545	272	455	280	46780	292	1889	300	17	292	2243	290	2321	306	603	284	1269	284	1269	288	3845	290	2381	290	2502	286	934	288	4136
288	4859	280	28287	276	1769	288	4465	280	17607	281	4611	274	988	272	671	279	56628	279	35441	279	35441	273	798	281	5978	293	957	302	1002	293	967	291	3793	307	1305	286	578	286	578	289	240	291	3363	291	3431	288	3757	289	101
289	768	281	4559	279	139447	289	770	281	1990	282	2279	275	13	273	819	280	10095	280	7999	280	7999	274	907	282	2520	294	1238	303	216	294	5900	292	2307	308	4175	288	4424	288	4424	290	1909	292	2192	292	2012	289	792	290	3035
290	2006	282	2165	280	24605	290	3226	282	2296	284	1980	276	1593	274	516	281	1783	281	681	281	681	276	1821	284	1312	295	7519	304	11416	295	1923	294	5826	309	32	289	675	289	675	291	2770	293	903	293	885	290	2633	291	1251
291	4470	284	1846	281	2962	291	3136	284	1954	286	563	279	101678	276	1734	282	983	282	2273	282	2273	279	138457	286	1608	296	26055	305	1903	296	33421	296	28153	310	257	290	1994	290	1994	292	2296	294	3868	294	2750	291	3205	292	3036
292	2639	286	330	282	1936	292	3222	286	1658	288	6296	280	16761	279	91447	284	933	284	772	284	772	280	23565	288	4460	297	4	306	878	298	136	297	51	312	316	291	3715	291	3715	293	827	295	2805	295	1487	292	3183	293	1826
293	1111	288	6533	284	1695	293	1040	288	4887	289	657	281	2444	280	18363	287	210	285	424	285	424	281	3216	289	786	302	2240	307	822	300	532	298	308	316	729	292	3194	292	3194	294	5942	296	28849	296	30484	293	1890	294	1569
294	4177	289	322	286	255	294	4881	289	1095	290	3172	282	2164	281	1593	288	3759	286	30	286	30	282	2336	290	3419	304	14784	308	4509	302	890	300	173	318	517	293	579	293	579	295	790	297	34	297	433	294	5728	295	8291
295	2683	290	3231	288	5168	295	6615	290	2136	291	3797	284	1323	282	1660	289	354	287	292	287	292	284	1233	291	3211	305	2337	309	57	303	1393	301	287	319	438	294	3765	294	3765	296	32043	298	1004	298	1342	295	3090	296	29757
296	31577	291	3431	289	1204	296	31749	291	3072	292	3143	286	621	284	1698	290	1954	288	3794	288	3794	286	411	292	3162	306	319	310	188	304	10896	302	1433	320	322	295	1171	295	1171	298	277	300	168	300	287	296	57085	298	1283
298	399	292	2999	290	2464	297	388	292	2549	293	1158	288	4284	286	232	291	2230	289	591	289	591	288	4375	293	3004	307	1026	312	424	305	2321	303	2246	321	109	296	36593	296	36593	300	731	302	1061	302	1402	298	831	300	1075
300	220	293	1273	291	3225	298	124	293	879	294	2588	289	805	288	4367	292	1781	290	1702	290	1702	289	476	294	6424	308	4587	316	845	306	791	304	11985	322	774	298	871	298	871	302	1697	304	14924	303	1159	300	221	302	728
302	1652	294	2363	292	2478	300	95	294	3641	295	44553	290	2475	289	436	293	2219	291	2333	291	2333	290	2370	296	47301	309	29	318	674	307	823	305	3419	324	734	300	736	300	736	303	111	305	2190	304	12401	302	1566	303	3914
303	1370	295	44197	293	2008	302	1569	295	225	298	1141	291	3309	290	3085	294	6831	292	1727	292	1727	291	2877	298	454	310	170	319	192	308	4630	306	1365	330	461	301	159	301	159	304	11917	306	1059	305	2347	303	841	304	9397
304	14253	298	1198	294	2822	303	790	296	29768	300	611	292	2929	291	2427	295	4507	293	1411	293	1411	292	2664	300	1007	316	594	320	392	309	20	307	247	331	153	302	1427	302	1427	305	2046	307	580	306	979	304	13370	305	2810
305	2877	300	443	295	36659	304	15002	297	985	302	2262	293	1417	292	2349	296	22294	294	2406	294	2406	293	1547	302	1313	317	105	321	143	310	324	308	6059	332	484	303	1021	303	1021	306	999	308	5527	307	470	305	2468	306	1189
306	1406	302	1771	297	347	305	2546	298	737	303	3225	294	5179	293	1428	298	297	296	25363	296	25363	294	4567	303	2652	318	239	322	711	312	283	309	736	334	2059	304	13151	304	13151	307	435	309	543	308	5591	306	1304	307	451
307	803	303	2767	298	889	306	1175	300	927	304	14612	295	4457	294	4472	300	314	297	677	297	677	295	2588	304	12009	319	102	324	719	316	976	310	154	335	40	305	2220	305	2220	308	3960	310	335	309	582	307	159	308	4946
308	5107	304	14981	300	895	307	543	301	261	305	2810	296	36253	296	33126	302	1356	298	779	298	779	296	40927	305	2672	320	270	325	9	317	38	312	189	336	378	306	907	306	907	309	299	312	42	310	302	308	5128	309	762
309	662	305	2882	302	1398	308	5250	302	1644	306	1146	298	522	300	645	304	14297	300	980	300	980	298	197	306	1160	321	22	330	787	318	289	316	1278	337	58	307	969	307	969	310	203	316	852	312	204	309	752	310	275
310	190	306	1010	303	2291	309	788	303	1560	307	1527	300	981	302	1235	305	2463	302	1511	302	1511	300	555	307	1022	322	413	332	614	319	36	318	326	339	266	308	6089	308	6089	312	112	317	846	316	923	310	225	313	521
312	310	307	1418	304	14920	310	381	304	13070	308	5476	301	276	303	432	306	922	303	1440	303	1440	301	491	308	5099	323	152	333	113	320	496	320	720	342	146	309	464	309	464	316	810	318	218	317	968	312	386	316	527
316	1455	308	5172	305	3000	312	444	305	2559	309	582	302	1466	304	15418	307	128	304	8786	304	8786	302	1219	309	664	324	415	334	2692	321	178	321	353	344	780	310	122	310	122	317	145	319	180	318	271	314	74	317	870
317	428	309	667	306	1417	316	1068	306	1116	310	508	303	2185	305	2978	308	4734	305	1452	305	1452	303	1575	310	372	330	251	335	80	322	871	322	1204	345	2115	312	588	312	588	318	257	320	426	319	28	316	1091	320	655
318	396	310	532	307	579	317	626	307	852	312	322	304	16395	306	1413	309	710	306	1282	306	1282	304	15010	312	735	332	415	336	271	324	264	324	698	346	7	316	1226	316	1226	319	26	321	200	320	472	318	344	321	9
320	459	312	407	308	5487	318	367	308	5000	316	2044	305	2990	307	241	310	442	307	1262	307	1262	305	2531	316	1017	333	888	339	200	325	408	330	798	347	243	317	120	317	120	320	449	322	861	321	112	320	741	322	346
322	872	316	1974	309	715	320	776	309	651	317	505	306	1637	308	5108	312	360	308	3303	308	3303	306	1607	318	667	334	2117	342	347	330	770	332	249	348	190	318	590	318	590	321	328	324	665	322	877	321	73	323	211
324	727	317	573	310	435	321	92	310	421	318	651	307	344	309	309	316	550	309	95	309	95	307	336	319	98	341	199	344	841	332	823	333	149	350	114	319	389	319	389	322	67	330	1551	324	545	322	821	324	685
326	78	318	508	312	411	322	748	312	514	319	350	308	5365	310	236	317	257	310	354	310	354	308	4962	320	654	344	1324	345	1819	334	3231	334	3956	351	8	320	517	320	517	324	428	332	722	326	121	323	231	328	420
330	1460	319	348	316	2309	323	37	316	2379	320	622	309	720	312	84	318	489	312	423	312	423	309	590	321	216	345	341	346	191	335	184	335	218	352	959	321	515	321	515	325	693	333	247	330	1456	324	886	330	1247
332	814	320	677	317	1090	324	473	317	643	321	150	310	369	316	480	320	544	316	578	316	578	310	329	322	889	346	1712	347	298	336	338	336	437	353	1	322	1076	322	1076	326	100	334	2788	332	968	325	47	331	83
333	173	321	97	318	420	326	40	318	571	322	1520	312	49	317	728	321	306	317	312	317	312	312	85	324	484	347	319	348	270	342	725	338	420	354	361	324	687	324	687	330	1244	335	213	333	764	330	2044	332	781
334	2734	322	1561	319	144	328	107	319	236	323	264	314	487	318	698	322	119	318	607	318	607	316	625	326	13	348	337	349	132	343	147	343	88	356	1502	330	1971	330	1971	332	659	336	478	334	2866	332	560	333	420
335	302	323	265	320	603	330	1276	320	635	324	465	316	649	320	937	324	344	319	5	319	5	317	265	330	1498	350	480	350	155	344	1088	344	958	357	226	332	871	332	871	333	40	337	9	335	441	333	269	334	3169
336	392	324	412	322	1288	332	406	321	41	326	58	317	418	321	61	326	28	320	180	320	180	318	696	332	807	356	1712	351	46	346	2384	345	599	360	304	333	492	333	492	334	2425	338	52	336	416	334	2939	335	429
337	45	326	83	324	490	334	3456	322	912	328	278	318	756	322	348	328	205	321	130	321	130	319	268	333	181	360	33	352	749	347	32	346	1184	361	245	334	2681	334	2681	335	215	342	25	344	836	335	367	336	762
342	17	328	202	326	326	335	389	323	36	330	1742	319	232	324	436	330	1521	322	366	322	366	320	781	334	3453	367	114	354	344	348	425	347	362	362	342	335	447	335	447	336	113	344	685	345	1382	336	479	338	326
344	729	330	1570	328	401	336	485	324	675	332	874	320	769	330	2503	332	534	324	242	324	242	321	46	335	624	370	473	356	1369	350	22	348	301	364	60	336	339	336	339	343	210	345	1667	346	1090	337	191	339	36
345	758	332	720	330	1840	338	167	326	291	333	324	321	262	332	1078	333	12	328	353	328	353	322	990	336	386	378	136	357	80	351	93	350	368	366	392	337	111	337	111	344	981	346	1229	347	29	340	123	341	145
346	1573	333	320	331	84	340	192	328	128	334	3338	322	904	333	547	334	2814	330	1590	330	1590	324	1059	337	32	379	367	358	24	352	32	352	181	376	82	338	152	338	152	345	2246	347	47	348	133	342	243	343	2000
347	75	334	3458	332	641	344	1190	330	1413	335	514	324	1128	334	2862	335	444	332	859	332	859	326	34	338	156	385	619	360	240	354	36	356	1682	378	138	339	386	339	386	346	445	348	200	349	75	344	991	344	1779
348	199	335	546	333	361	345	569	332	610	336	361	326	217	335	552	336	145	333	39	333	39	328	364	342	120	386	9056	361	184	356	1992	358	124	379	28	340	1	340	1	347	109	349	162	350	299	345	1009	346	3091
349	67	336	508	334	3754	346	3321	333	258	337	231	328	396	336	172	338	51	334	2306	334	2306	330	1918	343	129	387	1633	362	358	358	147	360	221	380	240	342	102	342	102	348	262	350	288	353	82	346	1563	347	490
350	329	337	105	335	740	347	61	334	3317	338	122	330	1567	338	414	342	234	335	815	335	815	332	736	344	942	388	15436	363	53	360	199	362	68	382	233	344	913	344	913	349	135	353	93	356	1850	347	50	348	1046
351	230	338	171	336	395	348	123	335	882	340	42	332	728	343	72	345	1596	336	386	336	386	333	225	346	2935	389	2759	364	127	364	121	364	84	385	648	345	1206	345	1206	350	467	356	1881	360	212	348	427	350	344
352	89	340	25	341	26	350	641	336	515	342	279	334	3512	344	286	346	1896	337	237	337	237	334	3469	347	114	390	2167	366	369	366	257	366	89	386	6237	346	1264	346	1264	351	105	358	59	364	133	350	302	352	111
356	1834	342	194	342	200	351	109	338	237	343	227	335	510	345	504	348	668	338	59	338	59	335	411	348	307	394	157	377	178	368	82	370	1327	387	786	347	151	347	151	352	109	360	200	366	570	351	256	356	1992
358	153	343	5	344	1326	356	1615	342	424	344	750	336	138	346	1304	349	15	339	174	339	174	336	90	350	370	400	311	378	52	370	927	378	102	388	12306	348	179	348	179	354	107	362	320	369	464	352	411	357	189
362	149	344	912	345	887	358	158	343	457	345	1602	338	85	347	300	350	641	340	206	340	206	339	367	352	186	406	1383	380	319	378	415	379	172	389	1709	350	477	350	477	356	1731	364	217	370	618	354	186	359	249
364	27	345	1795	346	1984	359	81	344	1236	346	1273	340	97	348	152	351	304	343	226	343	226	340	130	354	216	408	1660	382	167	379	132	380	72	390	960	351	557	351	557	360	201	365	73	376	20	356	2225	360	14
366	124	346	980	347	154	360	47	345	1110	347	185	342	129	349	24	354	204	344	618	344	618	342	70	356	1613	415	92	384	53	380	115	384	80	391	2748	352	93	352	93	364	159	366	154	378	95	358	205	361	168
368	347	347	161	348	680	362	96	346	1597	348	591	344	617	350	291	356	1475	345	1535	345	1535	344	1050	358	81	416	68	385	277	382	261	385	1783	392	1700	356	1378	356	1378	365	147	369	310	379	234	360	26	362	81
369	121	348	590	349	94	364	30	347	395	349	56	345	896	351	102	358	100	346	550	346	550	345	892	360	267	422	296	386	7292	385	739	386	11455	393	420	358	91	358	91	366	105	370	329	380	103	362	136	364	278
370	650	350	323	350	238	366	43	348	792	350	337	346	2175	352	98	363	174	347	608	347	608	346	1621	361	88	428	55	387	1139	386	10818	387	1813	394	2	360	105	360	105	368	179	377	28	385	1264	363	21	365	327
377	56	351	235	351	337	368	81	349	98	351	227	347	9	354	64	364	144	348	470	348	470	348	237	362	283	429	7331	388	13080	387	5	388	16339	397	232	361	106	361	106	369	7	378	103	386	11283	364	191	366	184
378	371	353	27	352	28	369	86	350	354	354	33	348	388	356	1649	366	169	349	139	349	139	349	59	364	147	430	1099	389	1560	388	19647	389	3191	399	346	362	62	362	62	370	302	379	265	387	594	366	385	368	311
379	188	354	86	356	2091	370	388	351	252	356	2763	349	103	358	75	369	278	350	456	350	456	350	155	366	342	432	185	390	1115	389	591	390	3458	404	47	365	166	365	166	376	403	380	59	388	15023	369	168	369	428
380	135	356	2377	357	46	378	410	352	723	360	209	350	286	362	153	378	11	351	465	351	465	351	178	367	124	436	298	391	1827	390	2664	391	3231	406	996	366	152	366	152	378	231	385	890	389	2541	379	805	377	151
385	453	358	128	358	349	379	48	354	128	361	62	351	151	367	176	379	89	352	529	352	529	352	118	371	21845	437	31	392	1503	391	71	392	994	408	888	369	757	369	757	379	54	386	11094	390	2360	380	321	379	583
386	9614	360	141	360	125	380	218	356	2194	362	150	352	151	369	256	380	377	354	172	354	172	356	1623	376	7	438	60	393	248	392	667	393	14	409	253	370	360	370	360	381	59	387	859	391	6013	382	45	381	164
388	17768	362	239	362	111	381	142	358	169	364	4	356	2422	378	113	381	207	356	1120	356	1120	360	15	377	27	440	88	394	8	396	33	394	80	412	119	377	187	377	187	382	266	388	14657	392	1050	385	1369	382	211
389	2014	363	143	364	140	385	1477	359	30	365	153	359	19	379	245	382	6	357	62	357	62	362	88	378	305	444	539	396	219	402	312	405	1705	413	129	378	185	378	185	383	76	389	2330	393	23	386	9550	384	529
390	2159	364	98	369	381	386	9634	360	197	366	114	360	67	380	63	383	182	358	134	358	134	364	88	379	203	451	98	400	378	404	162	407	2121	414	117	379	549	379	549	384	55	390	2088	394	45	388	16176	385	212
391	4765	365	181	370	797	387	1122	361	42	369	267	362	76	384	107	384	504	361	337	361	337	365	131	380	12	453	25	403	699	405	471	408	803	415	317	380	153	380	153	385	1200	391	5705	396	109	389	1399	386	10376
392	1411	367	179	376	150	388	16252	362	214	370	398	365	168	385	896	385	404	362	325	362	325	368	397	381	306	459	61	406	1248	406	579	409	172	418	169	383	137	383	137	386	7568	392	1369	399	35	390	1803	387	703
393	178	369	126	377	188	389	4093	364	10	376	114	368	287	386	8009	386	7998	364	45	364	45	377	28	382	10	460	2533	407	46	407	1141	416	163	423	132	385	1839	385	1839	387	1172	394	44	401	214	391	5708	388	13475
394	130	370	398	378	160	390	3458	365	54	377	130	378	520	388	9366	387	86	366	14	366	14	378	363	384	148	462	55228	408	497	408	873	418	226	428	1013	386	11226	386	11226	388	14214	397	38	402	763	392	1946	389	3911
402	589	376	30	379	302	391	6095	366	164	378	255	379	108	389	1746	388	13329	367	28	367	28	379	237	385	1547	463	20783	409	497	410	14	422	119	430	10398	387	2074	387	2074	389	2551	399	63	405	595	393	58	390	405
405	568	377	208	380	132	392	1790	368	209	379	200	380	153	390	1929	389	1043	368	21	368	21	380	211	386	11012	464	14470	411	72	414	129	428	776	431	565	388	11327	388	11327	390	2542	403	352	407	906	394	214	391	4740
406	872	378	148	382	32	393	61	369	256	380	150	382	22	391	1459	390	1578	378	159	378	159	384	209	387	2373	465	4671	414	368	415	93	430	6762	432	339	389	2282	389	2282	391	5993	404	493	408	1086	396	23	392	1352
407	665	379	268	384	55	398	11	370	78	385	1930	384	58	392	637	391	818	379	247	379	247	385	624	388	13850	466	1016	415	282	416	91	434	220	435	477	390	2228	390	2228	392	1212	405	67	414	266	405	592	393	316
408	732	380	85	385	979	404	1144	376	322	386	11202	385	846	404	689	392	289	380	96	380	96	386	7783	389	647	467	40	418	73	418	306	435	340	436	88	391	5372	391	5372	393	215	406	436	416	219	406	1015	395	59
409	444	382	134	386	12025	405	381	377	119	387	2074	386	8506	405	267	395	119	382	90	382	90	388	10951	390	2504	468	9	419	161	426	141	436	115	437	327	392	1319	392	1319	396	119	407	515	417	18	407	858	396	72
413	323	384	170	387	392	406	1018	378	368	388	20422	387	109	406	316	396	201	385	138	385	138	389	1145	391	4144	478	277	424	121	428	1462	437	94	438	1	393	17	393	17	400	299	408	1322	418	362	408	1456	398	199
416	121	385	1924	388	21439	407	1013	379	239	389	2106	388	10841	407	613	398	48	386	6630	386	6630	390	1021	392	1299	479	361	426	213	430	6424	444	726	439	124	394	3	394	3	403	1052	413	1	424	145	410	182	401	5
419	4	386	11234	389	2858	408	1021	380	216	390	4483	389	576	408	814	402	645	387	1387	387	1387	391	2432	393	88	480	212	428	1049	431	938	452	142	442	33	400	381	400	381	406	852	414	282	428	977	414	538	403	731
420	208	387	2712	390	3477	410	122	381	113	391	5936	390	914	409	497	406	804	388	9383	388	9383	392	995	394	173	481	234	429	9446	434	177	457	37	444	1485	405	239	405	239	407	2531	415	40	429	838	415	51	405	839
421	72	388	19043	391	5636	415	9	382	40	392	1114	391	3475	410	9	407	1303	389	2834	389	2834	394	178	398	239	482	30	431	647	436	414	459	576	452	48	406	898	406	898	412	18	416	65	430	6777	416	163	407	2890
422	92	389	1528	392	1118	416	86	384	11	393	289	392	1347	414	365	408	111	390	1640	390	1640	396	43	400	37	486	19	432	301	437	122	460	3413	454	207	407	863	407	863	414	213	423	23	431	1131	419	221	408	706
424	33	390	4186	393	93	420	91	385	1234	396	55	394	88	416	154	411	191	391	1855	391	1855	402	554	402	1119	488	84	435	381	444	1475	462	59043	459	628	408	911	408	911	415	21	424	164	432	49	420	169	411	116
425	154	391	6829	400	493	421	86	386	10545	402	1060	397	78	417	100	412	16	392	1278	392	1278	405	1680	405	229	489	468	436	71	451	64	463	20981	461	5671	409	424	409	424	417	53	429	1571	434	212	424	223	412	131
428	1200	392	1145	401	189	422	192	387	2903	405	141	398	15	419	339	414	2	393	20	393	20	406	1350	406	1294	490	129	437	230	452	54	464	14811	462	38954	414	982	414	982	418	9	430	7804	436	140	426	143	413	33
429	9769	393	387	404	89	424	2	388	17091	406	1374	402	488	420	64	421	47	394	112	394	112	407	393	407	885	492	22	438	75	454	82	465	4275	463	17129	415	155	415	155	419	115	431	1101	440	87	427	95	414	717
430	1625	396	15	405	66	428	1914	389	2820	407	889	404	582	423	20	422	70	395	74	395	74	408	1133	408	623	497	23	439	94	459	198	466	1645	464	12101	416	4	416	4	422	60	432	134	453	37	429	2627	415	718
432	540	402	862	406	553	430	10863	390	3033	408	1062	405	35	426	167	424	140	396	83	396	83	409	238	409	183			444	106	460	1539	467	98	465	4293	418	174	418	174	424	189	434	123	458	3	430	11139	416	251
434	125	405	223	407	1521	431	1351	391	3711	409	528	406	1889	428	791	426	24	404	983	404	983	410	151	412	315			452	101	461	1639	468	4	466	1148	421	86	421	86	426	138	435	453	460	3258	431	1039	417	852
436	145	406	1342	408	399	433	280	392	1185	410	7	407	398	429	4975	428	360	406	882	406	882	414	30	414	221			454	102	462	52870	473	22	467	322	424	29	424	29	427	132	436	51	462	47169	432	235	418	264
438	209	407	990	409	66	435	92	393	98	411	11	408	1140	430	1226	429	1230	407	915	407	915	416	349	416	541			457	35	463	23368	475	128	468	87	426	84	426	84	428	1448	438	239	463	18622	433	46	419	1529
444	230	408	558	410	21	436	106	394	89	414	348	409	324	431	818	430	7000	408	718	408	718	420	79	418	535			459	685	464	16113	478	1157	472	301	428	1405	428	1405	429	8235	453	61	464	12508	434	256	420	73
455	46	409	106	413	149	437	68	395	1	415	28	410	162	432	249	431	1131	409	448	409	448	422	4	420	82			460	1783	465	4655	479	938	474	310	429	2565	429	2565	430	271	456	37	465	3700	435	440	422	185
459	299	410	231	414	232	440	383	396	127	416	37	416	266	433	70	435	243	410	66	410	66	424	239	422	168			461	2953	466	846	480	378	475	355	430	7079	430	7079	431	473	459	432	466	1257	436	124	423	126
460	1952	411	53	416	173	442	81	400	153	417	14	417	119	434	106	436	43	413	44	413	44	426	15	423	174			462	41006	467	405	481	212	476	830	431	863	431	863	432	444	460	2159	467	177	437	158	424	305
461	1122	414	368	418	402	451	63	401	239	418	196	419	90	436	306	438	207	414	31	414	31	429	2845	424	223			463	18127	468	33	482	46	478	611	432	199	432	199	433	79	461	93	474	111	438	14	425	91
462	37805	415	28	419	44	455	25	404	1807	420	150	420	209	440	26	452	70	416	187	416	187	430	6388	427	377			464	12087	470	109	486	38	479	657	434	84	434	84	434	111	462	45264	476	38	440	458	426	269
463	16314	417	39	420	118	459	240	405	724	422	41	422	13	442	89	454	25	417	296	417	296	431	631	428	1051			465	4572	474	34	487	35	480	73	435	51	435	51	435	84	463	18740	478	276	444	226	427	173
464	10907	418	145	421	35	460	2304	406	969	424	73	423	21	458	65	458	282	420	375	420	375	432	60	429	13825			466	1074	478	1171	488	245	481	144	436	115	436	115	436	187	464	12259	479	468	451	99	428	1171
465	3393	420	267	424	230	462	43838	407	1300	427	34	424	154	460	1604	460	1151	421	258	421	258	434	59	431	1937			467	263	479	625	489	145	482	79	437	244	437	244	438	101	465	3635	480	168	452	3	429	2703
466	1225	423	25	428	1431	463	16778	408	379	429	2319	426	18	461	4941	461	4570	422	101	422	101	436	364	432	270			468	68	480	152	490	120	483	16	440	9	440	9	439	145	466	1259	482	67	454	37	430	8141
467	4	424	144	430	9935	464	12400	409	241	430	10522	429	2556	462	39534	462	35523	424	309	424	309	438	70	433	99			473	213	481	209	491	96	484	423	444	891	444	891	441	68	467	275	483	15	455	68	431	1249
468	26	427	611	431	1457	465	3713	413	6	431	1142	430	7597	463	15305	463	14891	426	331	426	331	442	132	434	159			474	307	482	63	494	66	486	79	451	95	451	95	452	24	468	34	484	20	459	123	432	160
474	124	429	2403	434	135	466	1346	414	267	432	124	431	770	464	11354	464	9460	427	232	427	232	444	787	435	228			475	218	483	158			487	101	452	88	452	88	455	38	474	115	487	47	460	976	433	474
476	379	430	10656	435	32	467	198	415	183	435	423	432	58	465	3540	465	3135	428	1181	428	1181	458	138	436	187			477	247	484	3			488	457	454	69	454	69	458	145	476	104	488	258	461	610	434	15
477	110	431	858	436	228	468	29	416	219	438	146	434	130	466	698	466	678	429	8065	429	8065	460	684	438	178			478	1390	486	134			489	334	457	36	457	36	459	413	478	309	489	208	462	52420	435	279
478	745	432	383	437	38	472	24	417	67	441	80	436	228	467	293	467	91	430	1434	430	1434	461	1524	439	57			479	782	487	27			490	38	460	2298	460	2298	460	1888	479	716	490	128	463	20260	436	177
480	351	435	420	438	17	474	168	418	298	452	27	442	242	475	85	468	33	431	362	431	362	462	42237	444	186			480	24	488	176			491	175	461	5125	461	5125	462	41512	480	269	491	93	464	13705	439	277
481	158	438	132	439	83	476	32	421	140	458	49	444	1053	478	745	474	29	432	142	432	142	463	18863	456	42			481	143	489	316			492	100	462	39745	462	39745	463	18193	488	69	492	29	465	3734	443	0
482	142	452	11	444	165	478	516	422	92	459	408	450	131	479	203	475	79	433	5	433	5	464	11729	460	1507			482	19	490	192			493	89	463	16896	463	16896	464	11091	489	603	497	79	466	2029	444	727
486	56	458	34	458	146	479	292	423	58	460	1297	452	41	481	58	476	8	434	111	434	111	465	3379	461	5043			483	40	492	164			494	34	464	11985	464	11985	465	3252	490	24			467	241	453	148
488	358	459	452	459	162	480	627	424	223	461	4488	453	124	483	47	478	714	435	289	435	289	466	1112	462	39099			484	404	494	15			496	12	465	2991	465	2991	466	1338	491	267			470	1	454	159
489	377	460	1216	460	2526	481	55	426	46	462	47617	454	131	488	113	479	69	437	195	437	195	467	90	463	17994			486	88					500	88	466	1447	466	1447	467	251	492	3			472	113	459	901
490	205	461	4488	462	51839	482	80	427	258	463	20975	458	101	489	540	480	370	439	305	439	305	475	156	464	13485			487	168							467	65	467	65	468	190	497	63			474	8	460	1417
493	59	462	47507	463	19141	483	83	428	1147	464	13777	459	825	490	366	481	175	441	810	441	810	476	22	465	3694			488	534							468	63	468	63	470	97					476	71	462	54380
499	135	463	20510	464	14630	488	290	429	9513	465	4441	460	2315	495	32	483	28	442	225	442	225	478	783	466	1218			489	232							472	129	472	129	472	157					478	205	463	24389
500	4	464	13760	465	4391	489	552	430	870	466	981	462	42987			488	98	444	307	444	307	480	454	467	99			491	124							474	14	474	14	473	23					480	777	464	15007
		465	4360	466	1381	490	378	431	804	467	154	463	18379			489	476	451	5	451	5	481	136	468	117			492	66							476	256	476	256	476	108					482	371	465	3739
		466	913	467	344	491	167	432	719	468	16	464	11954			490	146	452	112	452	112	483	39	470	16			494	147							478	582	478	582	478	921					484	15	466	1459
		467	110	468	81	493	29	434	191	472	80	465	3142			491	135	454	121	454	121	484	4	472	199			495	13							479	151	479	151	479	289					487	126	469	102
		472	74	470	101	494	10	435	162	473	46	466	1153			492	127	455	74	455	74	486	107	475	162			500	2							480	341	480	341	480	324					488	390	470	33
		473	79	472	29	495	25	436	51	476	54	467	139			496	8	456	70	456	70	488	147	476	228											481	199	481	199	481	73					489	1312	472	213
		475	57	473	35	497	50	437	142	477	386	468	13			500	27	457	62	457	62	489	546	478	1176											482	67	482	67	482	115					490	283	475	55
		477	386	474	7			438	181	478	426	474	292					458	82	458	82	490	645	479	347											484	93	484	93	483	170					491	146	479	511
		478	489	475	162			439	67	479	496	476	145					460	1908	460	1908	491	50	480	114											486	67	486	67	484	154					496	21	481	421
		479	631	478	1116			440	43	480	261	478	421					461	1850	461	1850	497	67	482	225											487	6	487	6	488	373					500	2	482	222
		480	387	479	333			441	235	481	311	480	787					462	33362	462	33362			483	101											489	699	489	699	489	743							483	82
		481	241	480	361			442	247	482	89	481	173					463	14436	463	14436			484	33											490	277	490	277	490	140							485	129
		482	96	481	217			443	144	488	335	484	62					464	10827	464	10827			488	126											491	27	491	27	493	87							486	30
		488	291	488	223			444	241	489	918	486	56					465	2439	465	2439			489	768											494	12	494	12	494	42							487	52
		489	864	489	888			452	207	491	213	488	210					466	1453	466	1453			490	401											495	25	495	25	496	139							488	650
		491	170	490	38			453	33	492	132	489	509					467	359	467	359			492	105											497	3	497	3	498	27							489	579
		492	142	491	8			455	333	499	15	490	495					468	123	468	123			494	78																							490	338
		496	17					456	80			492	34					469	107	469	107			497	49																							491	194
								458	234			495	32					470	137	470	137			498	36																							492	61
								459	732			496	102					471	199	471	199																											494	22
								460	2420									472	93	472	93
								461	3399									473	139	473	139
								462	41599									474	221	474	221
								463	18157									476	27	476	27
								464	12060									477	124	477	124
								465	4189									478	573	478	573
								466	1787									479	501	479	501
								467	370									480	68	480	68
								468	129									481	72	481	72
								469	23									482	9	482	9
								470	99									484	283	484	283
								471	60									485	108	485	108
								472	218									486	193	486	193
								474	361									487	94	487	94
								475	228									489	542	489	542
								476	220									490	504	490	504
								478	1334									491	119	491	119
								479	575									492	220	492	220
								480	501									493	108	493	108
								481	361									494	143	494	143
								482	386									496	16	496	16
								484	375									497	20	497	20
								485	152									498	142	498	142
								487	325									499	118	499	118
								488	207									500	16	500	16
								489	778
								490	126
								491	60
								492	47
								496	43
								497	59
								498	106
								499	27
[truncated: 10 more columns]

## Sheet: stored for 1 year
1												2												3												4												5
SPECTRUM - MS		SPECTRUM - MS		SPECTRUM - MS		SPECTRUM - MS		SPECTRUM - MS		SPECTRUM - MS		SPECTRUM - MS		SPECTRUM - MS		SPECTRUM - MS		SPECTRUM - MS		SPECTRUM - MS		SPECTRUM - MS		SPECTRUM - MS		SPECTRUM - MS		SPECTRUM - MS		SPECTRUM - MS		SPECTRUM - MS		SPECTRUM - MS		SPECTRUM - MS		SPECTRUM - MS		SPECTRUM - MS		SPECTRUM - MS		SPECTRUM - MS		SPECTRUM - MS		SPECTRUM - MS
dapci-lotus seeds_2011-1.raw		dapci-lotus seeds_2011-1.raw		dapci-lotus seeds_2011-1.raw		dapci-lotus seeds_2011-1.raw		dapci-lotus seeds_2011-1.raw		dapci-lotus seeds_2011-1.raw		dapci-lotus seeds_2011-2'.raw		dapci-lotus seeds_2011-2'.raw		dapci-lotus seeds_2011-2'.raw		dapci-lotus seeds_2011-2'.raw		dapci-lotus seeds_2011-2'.raw		dapci-lotus seeds_2011-2'.raw		dapci-lotus seeds_2011-3.raw		dapci-lotus seeds_2011-3.raw		dapci-lotus seeds_2011-3.raw		dapci-lotus seeds_2011-3.raw		dapci-lotus seeds_2011-3.raw		dapci-lotus seeds_2011-3.raw		dapci-lotus seeds_2011-6.raw		dapci-lotus seeds_2011-6.raw		dapci-lotus seeds_2011-6.raw		dapci-lotus seeds_2011-6.raw		dapci-lotus seeds_2011-6.raw		dapci-lotus seeds_2011-6.raw		dapci-lotus seeds_2011-6.raw
ITMS + c ESI Full ms [65.05-500.00]		ITMS + c ESI Full ms [65.05-500.00]		ITMS + c ESI Full ms [65.05-500.00]		ITMS + c ESI Full ms [65.05-500.00]		ITMS + c ESI Full ms [65.05-500.00]		ITMS + c ESI Full ms [65.05-500.00]		ITMS + c ESI Full ms [65.05-500.00]		ITMS + c ESI Full ms [65.05-500.00]		ITMS + c ESI Full ms [65.05-500.00]		ITMS + c ESI Full ms [65.05-500.00]		ITMS + c ESI Full ms [65.05-500.00]		ITMS + c ESI Full ms [65.05-500.00]		ITMS + c ESI Full ms [65.05-500.00]		ITMS + c ESI Full ms [65.05-500.00]		ITMS + c ESI Full ms [65.05-500.00]		ITMS + c ESI Full ms [65.05-500.00]		ITMS + c ESI Full ms [65.05-500.00]		ITMS + c ESI Full ms [65.05-500.00]		ITMS + c ESI Full ms [65.05-500.00]		ITMS + c ESI Full ms [65.05-500.00]		ITMS + c ESI Full ms [65.05-500.00]		ITMS + c ESI Full ms [65.05-500.00]		ITMS + c ESI Full ms [65.05-500.00]		ITMS + c ESI Full ms [65.05-500.00]		ITMS + c ESI Full ms [65.05-500.00]
Scan #: 2587-2598		Scan #: 2494-2508		Scan #: 2494-2508		Scan #: 2653-2666		Scan #: 1822-1847		Scan #: 1529-1543		Scan #: 1166-1178		Scan #: 1166-1177		Scan #: 1311-1317		Scan #: 1308-1321		Scan #: 1166-1177		Scan #: 1165-1178		Scan #: 1111-1116		Scan #: 1123-1131		Scan #: 379-383		Scan #: 611-623		Scan #: 617-623		Scan #: 1112-1118		Scan #: 619-622		Scan #: 434-443		Scan #: 474-480		Scan #: 490-493		Scan #: 435-443		Scan #: 516-520		Scan #: 612-623
RT: 12.45-12.50		RT: 12.02-12.08		RT: 12.02-12.08		RT: 12.76-12.82		RT: 8.88-9.00		RT: 7.37-7.44		RT: 5.61-5.66		RT: 5.61-5.66		RT: 6.32-6.35		RT: 6.31-6.37		RT: 5.61-5.66		RT: 5.60-5.66		RT: 5.58-5.61		RT: 5.64-5.68		RT: 1.86-1.88		RT: 3.03-3.08		RT: 3.06-3.08		RT: 5.59-5.62		RT: 2.89-2.90		RT: 2.02-2.07		RT: 2.21-2.24		RT: 2.28-2.30		RT: 2.03-2.07		RT: 2.41-2.42		RT: 2.85-2.90
AV: 12		AV: 15		AV: 15		AV: 14		AV: 26		AV: 15		AV: 13		AV: 12		AV: 7		AV: 14		AV: 12		AV: 14		AV: 6		AV: 9		AV: 5		AV: 13		AV: 7		AV: 7		AV: 4		AV: 10		AV: 7		AV: 4		AV: 9		AV: 5		AV: 12
SB: 291 9.98-10.80 , 5.38-5.92		SB: 291 9.98-10.80 , 5.38-5.92		SB: 291 9.98-10.80 , 5.38-5.92		SB: 291 9.98-10.80 , 5.38-5.92		SB: 291 9.98-10.80 , 5.38-5.92		SB: 291 9.98-10.80 , 5.38-5.92		SB: 174 7.59-8.17 , 2.59-2.82		SB: 174 7.59-8.17 , 2.59-2.82		SB: 174 7.59-8.17 , 2.59-2.82		SB: 174 7.59-8.17 , 2.59-2.82		SB: 174 7.59-8.17 , 2.59-2.82		SB: 174 7.59-8.17 , 2.59-2.82		SB: 107 5.84-6.20 , 0.05-0.18		SB: 107 5.84-6.20 , 0.05-0.18		SB: 107 5.84-6.20 , 0.05-0.18		SB: 107 5.84-6.20 , 0.05-0.18		SB: 107 5.84-6.20 , 0.05-0.18		SB: 103 5.82-6.17 , 0.03-0.15
Mass defect: 0.00 @ 1.00, 300.00 @ 1000.00		Mass defect: 0.00 @ 1.00, 300.00 @ 1000.00		Mass defect: 0.00 @ 1.00, 300.00 @ 1000.00		Mass defect: 0.00 @ 1.00, 300.00 @ 1000.00		Mass defect: 0.00 @ 1.00, 300.00 @ 1000.00		Mass defect: 0.00 @ 1.00, 300.00 @ 1000.00		Mass defect: 0.00 @ 1.00, 300.00 @ 1000.00		Mass defect: 0.00 @ 1.00, 300.00 @ 1000.00		Mass defect: 0.00 @ 1.00, 300.00 @ 1000.00		Mass defect: 0.00 @ 1.00, 300.00 @ 1000.00		Mass defect: 0.00 @ 1.00, 300.00 @ 1000.00		Mass defect: 0.00 @ 1.00, 300.00 @ 1000.00		Mass defect: 0.00 @ 1.00, 300.00 @ 1000.00		Mass defect: 0.00 @ 1.00, 300.00 @ 1000.00		Mass defect: 0.00 @ 1.00, 300.00 @ 1000.00		Mass defect: 0.00 @ 1.00, 300.00 @ 1000.00		Mass defect: 0.00 @ 1.00, 300.00 @ 1000.00		Mass defect: 0.00 @ 1.00, 300.00 @ 1000.00		Mass defect: 0.00 @ 1.00, 300.00 @ 1000.00		Mass defect: 0.00 @ 1.00, 300.00 @ 1000.00		Mass defect: 0.00 @ 1.00, 300.00 @ 1000.00		Mass defect: 0.00 @ 1.00, 300.00 @ 1000.00		Mass defect: 0.00 @ 1.00, 300.00 @ 1000.00		Mass defect: 0.00 @ 1.00, 300.00 @ 1000.00		Mass defect: 0.00 @ 1.00, 300.00 @ 1000.00
Data points: 268		Data points: 258		Data points: 258		Data points: 252		Data points: 249		Data points: 250		Data points: 229		Data points: 230		Data points: 250		Data points: 246		Data points: 230		Data points: 232		Data points: 253		Data points: 221		Data points: 261		Data points: 183		Data points: 184		Data points: 245		Data points: 419		Data points: 428		Data points: 425		Data points: 418		Data points: 428		Data points: 420		Data points: 425
Mass	Intensity	Mass	Intensity	Mass	Intensity	Mass	Intensity	Mass	Intensity	Mass	Intensity	Mass	Intensity	Mass	Intensity	Mass	Intensity	Mass	Intensity	Mass	Intensity	Mass	Intensity	Mass	Intensity	Mass	Intensity	Mass	Intensity	Mass	Intensity	Mass	Intensity	Mass	Intensity	Mass	Intensity	Mass	Intensity	Mass	Intensity	Mass	Intensity	Mass	Intensity	Mass	Intensity	Mass	Intensity
70	2232	70	1815	70	1815	70	1752	70	1187	70	1066	70	2228	70	2215	70	2132	70	1871	70	2215	70	2063	70	3075	70	3445	70	2047	70	2051	70	2155	70	3173	65	48502	65	56319	65	54430	65	81695	65	59674	65	47714	65	67905
72	160	72	106	72	106	72	145	74	4211	74	3620	76	46462	76	46577	72	208	72	34	76	46577	76	43478	72	101	72	479	72	547	74	20170	74	22300	72	175	66	10252	66	10757	66	11489	66	15970	66	11279	66	11525	66	15248
74	28201	74	6253	74	6253	74	14704	76	32096	76	44211	77	355	77	427	76	38430	76	35125	77	427	77	213	74	14925	74	19763	74	31482	76	37645	75	64	74	12056	67	2738	67	2459	67	2452	67	4154	67	2577	67	2438	67	3637
76	35309	76	40961	76	40961	76	42294	77	2196	77	3563	78	9455	78	9456	78	9093	78	8677	78	9456	78	8869	76	42451	76	44074	75	1181	77	1733	76	37521	76	33720	69	951	68	13	68	242	68	342	68	14	68	276	68	135
77	1411	77	4309	77	4309	77	5545	78	14334	78	14650	80	1956	80	1784	80	1422	80	721	80	1784	80	1793	77	2032	77	2014	76	28644	78	8806	77	1840	77	927	70	3293	69	1264	69	1258	69	1549	69	1224	69	1313	69	1306
78	12833	78	13151	78	13151	78	12752	80	1000	80	1302	91	179188	91	180486	91	30695	91	1336	91	180486	91	11973	78	15863	78	17052	77	1299	80	3355	78	9111	78	14338	71	1927	70	3217	70	3144	70	3384	70	3206	70	2829	70	3105
80	2177	80	2237	80	2237	80	2017	90	1627	91	105652	92	706	92	725	92	1442	92	208	92	725	92	748	80	3688	80	3326	78	10478	91	77908	80	3326	80	2946	73	14473	71	2290	71	2940	71	3631	71	2317	71	3439	71	3010
91	131592	91	153080	91	153080	91	127453	91	14222	92	4328	96	1580	96	1453	96	1325	96	1237	96	1453	96	1359	91	62995	91	56362	80	2604	92	3637	91	74149	91	42514	74	50769	72	500	72	846	72	205	72	556	72	534	72	526
92	6567	92	7510	92	7510	92	6276	92	816	93	127	100	11	100	137	102	15584	102	20294	100	137	102	16303	92	3128	92	2540	91	72379	96	18	92	3695	92	3402	75	3346	73	15093	73	15654	73	18674	73	15228	73	18761	73	17707
93	2550	93	5513	93	5513	93	8984	100	1892	100	1134	102	17636	102	17252	104	3633	104	3525	102	17252	104	4062	96	927	100	843	92	3753	102	1873	102	2249	96	164	76	75892	74	40222	74	36539	74	35561	74	39960	74	33892	74	40414
96	3285	96	401	96	401	100	1182	102	10532	102	7298	104	4247	104	3987	106	3141	106	2462	104	3987	106	2398	100	1366	102	27055	96	1228	104	1547	104	1564	100	1120	77	9922	75	2975	75	1967	75	3052	75	3305	75	2605	75	2407
100	388	100	1780	100	1780	102	31950	104	2181	104	2544	106	2521	106	2514	108	179838	108	158701	106	2514	108	172617	102	23656	104	4146	100	166	106	1745	106	1933	102	17538	78	21638	76	86388	76	82891	76	70163	76	84994	76	82702	76	75532
102	61050	102	9249	102	9249	104	2341	106	1562	106	1812	108	185487	108	185078	109	4588	109	3678	108	185078	109	4693	104	5285	106	2693	102	61130	108	170659	108	169288	104	4439	79	5329	77	11657	77	12790	77	10012	77	11477	77	12612	77	11211
104	3259	104	2547	104	2547	106	2707	108	144520	108	246247	109	5018	109	5092	110	11815	110	10744	109	5092	110	10385	106	2996	108	216614	104	3438	109	4741	109	4580	106	2577	80	12958	78	19586	78	21719	78	17478	78	19319	78	18657	78	19540
106	2894	106	2549	106	2549	108	183253	109	5021	109	9886	110	11178	110	11479	112	8602	112	8119	110	11479	112	12708	108	198283	109	6307	106	2152	110	10187	110	10289	108	184971	81	2350	79	5182	79	5935	79	5485	79	5129	79	5668	79	5813
108	187012	108	204755	108	204755	109	8271	110	40590	110	43192	112	13618	112	13646	114	729	114	312	112	13646	114	575	109	6800	110	22562	108	190527	112	9547	112	9715	109	6100	82	244	80	13403	80	12791	80	12175	80	13388	80	11963	80	12536
109	7646	109	9163	109	9163	110	40169	112	8378	112	7384	114	553	114	532	118	6807	118	6574	114	532	118	7550	110	21619	112	14368	109	5807	117	7927	114	152	110	20074	83	1100	81	2483	81	2764	81	2773	81	2527	81	3185	81	2812
110	34883	110	39166	110	39166	112	4663	114	1191	114	692	118	8035	118	8047	124	12657	124	11685	118	8047	124	11588	112	14941	114	1460	110	21577	118	5763	117	6953	112	13369	84	445	82	161	82	393	82	616	82	178	82	369	82	420
112	4060	112	5397	112	5397	114	1059	117	7539	116	45	124	12434	124	12503	132	6160	132	5916	124	12503	132	7203	114	1974	117	317	112	9069	124	14419	118	6054	114	942	85	4303	83	1683	83	1859	83	1883	83	1706	83	1943	83	1610
114	1055	114	1275	114	1275	116	2241	118	6029	117	14884	132	7580	132	7513	135	242113	135	216152	132	7513	135	207670	117	1995	118	9503	114	504	132	5848	124	15660	118	8822	86	2737	84	861	84	766	84	598	84	839	84	713	84	727
116	1353	116	881	116	881	117	22068	124	14448	118	8810	135	220991	135	223389	136	13170	136	10934	135	223389	136	10707	118	10259	124	19115	117	5175	135	303956	132	5993	124	17972	87	7362	85	4586	85	5210	85	5905	85	4624	85	6043	85	5337
117	14403	117	24043	117	24043	118	8434	132	4367	120	315	136	11051	136	11288	138	1845	138	1807	136	11288	138	2860	124	19240	126	224	118	7929	136	16591	135	302515	132	6197	88	5370	86	2889	86	3161	86	3077	86	2908	86	2949	86	2920
118	9482	118	9020	118	9020	120	3	135	228696	124	15914	138	3099	138	3129	144	4164	144	3298	138	3129	144	4481	132	7903	132	8359	124	17286	138	2284	136	16576	135	277193	89	6387	87	7193	87	8841	87	10511	87	7504	87	9486	87	9765
120	369	120	378	120	378	123	2981	136	12920	132	6933	144	4706	144	4779	146	644	146	481	144	4779	146	1336	135	304908	135	252153	126	473	144	2292	138	2355	136	16511	91	261224	88	6457	88	5946	88	6467	88	6404	88	5937	88	6154
123	3644	123	3334	123	3334	124	15490	138	1618	135	308442	146	1293	146	1301	148	1085	148	735	146	1301	148	1064	136	20327	136	14031	132	6779	146	228	144	2722	138	3974	92	12668	89	6937	89	8066	89	8670	89	7011	89	8769	89	8087
124	16177	124	17984	124	17984	130	8	144	3374	136	21597	148	1217	148	1091	152	2015014	152	1825938	148	1091	152	1924641	138	4745	138	4073	135	314747	148	1456	146	204	144	6293	93	11024	91	281213	91	270422	91	281921	91	276009	91	290159	91	256447
132	6738	126	156	126	156	132	5825	146	842	138	1958	152	2068603	152	2065980	153	105207	153	95846	152	2065980	153	108992	144	6699	144	6038	136	20283	152	2019083	148	1539	146	1475	94	16535	92	13880	92	12825	92	13984	92	13848	92	14035	92	12508
135	498711	132	6974	132	6974	135	465217	148	2031	144	3816	153	117407	153	117220	154	10760	154	9220	153	117220	154	10266	146	2244	146	2075	138	2455	153	119416	152	2058030	148	1673	95	4002	93	13739	93	11302	93	15539	93	13740	93	11458	93	11556
136	33511	135	480674	135	480674	136	31074	150	666	146	1787	154	11013	154	11115	156	6306	156	4747	154	11115	156	5315	148	2023	148	1217	144	5777	154	11581	153	122432	152	2052784	96	5013	94	16303	94	16297	94	16596	94	16406	94	16140	94	16222
138	1222	136	33923	136	33923	138	1277	152	1956019	148	3889	156	5663	156	5645	158	5408	158	5841	156	5645	158	5512	152	2049486	150	614	146	738	156	4141	154	11720	153	129032	97	8067	95	4482	95	4241	95	4915	95	4536	95	4933	95	4373
144	3841	138	2022	138	2022	144	3629	153	119310	150	2197	158	5891	158	5911	160	6333	160	5616	158	5911	160	6095	153	122795	152	2083932	148	2917	158	393	156	4517	154	11957	98	1079	96	4134	96	5054	96	5782	96	4109	96	3219	96	5976
146	526	144	3955	144	3955	146	1049	154	12164	152	2180106	160	6444	160	6382	162	6641	162	6020	160	6382	162	7785	154	11901	153	122787	150	583	160	4142	158	191	156	4786	99	12215	97	9006	97	9208	97	11840	97	9461	97	10281	97	10667
148	2981	146	2002	146	2002	148	3447	156	3369	153	128159	162	7693	162	7857	166	6617	166	5165	162	7857	166	4586	156	5971	154	12328	152	2089845	162	6325	160	4322	158	6770	100	8138	98	1255	98	1354	98	1917	98	1260	98	879	98	1291
150	391	148	2636	148	2636	150	931	158	2895	154	13657	166	4803	166	4625	167	9369	167	7629	166	4625	167	4624	158	9213	156	6208	153	118765	166	4427	162	6034	160	5814	101	22266	99	14338	99	16763	99	20385	99	14336	99	20942	99	17711
152	2133337	150	1517	150	1517	152	2129270	160	3843	156	6150	167	4506	167	4656	168	2355	168	1946	167	4656	168	1312	160	6451	158	8774	154	12551	167	13976	166	4573	162	7122	102	52259	100	7141	100	8390	100	7060	100	7182	100	7220	100	8191
153	133097	152	2093422	152	2093422	153	131381	162	5055	158	4308	168	1429	168	1411	170	1146	170	959	168	1411	170	2233	162	7283	160	6469	156	4419	168	1696	167	14409	166	6237	103	6899	101	24333	101	25186	101	26659	101	24502	101	26284	101	23754
154	13597	153	131834	153	131834	154	15151	166	4483	160	5421	170	2495	170	2524	172	9912	172	9031	170	2524	172	9188	166	7918	162	8753	158	22529	170	1404	168	1404	167	14397	104	10621	102	26846	102	28342	102	21243	102	26521	102	20575	102	35393
156	3469	154	13707	154	13707	156	4782	167	6658	162	8638	172	9948	172	9710	174	4583	174	4311	172	9710	174	4577	167	17871	166	5188	160	5513	172	7453	170	1427	168	3124	105	5863	103	5279	103	6032	103	5928	103	5378	103	5392	103	6551
158	12331	156	5434	156	5434	158	8155	168	1477	166	3715	174	4819	174	4904	176	3306	176	3078	174	4904	176	2110	168	3473	167	9269	162	6098	174	2557	172	8117	170	906	106	4968	104	9824	104	11336	104	9103	104	9781	104	9884	104	10275
160	5084	158	2567	158	2567	160	4507	170	1414	167	12063	176	2200	176	2182	177	625	177	65	176	2182	177	3092	170	1875	168	1765	167	27859	176	791	174	2937	172	19035	108	257427	105	5438	105	5929	105	5613	105	5464	105	6120	105	6278
162	6267	160	5620	160	5620	162	6482	172	7104	168	2122	177	3260	177	3607	178	3073	178	2417	177	3607	178	2565	172	19455	170	3165	168	2951	178	1157	176	826	174	4079	109	17783	106	4679	106	4210	106	4183	106	4649	106	4256	106	4491
166	13878	162	5821	162	5821	166	8561	174	3070	170	3085	178	2675	178	2683	180	3485	180	3786	178	2683	180	3638	174	4955	172	19745	170	1241	180	2474	178	1619	176	3225	110	58751	107	1719	107	4438	108	228896	107	1910	107	3039	107	2648
167	43929	166	7235	166	7235	167	34201	176	2197	172	9882	180	3882	180	3671	182	19	186	14879	180	3671	186	14254	176	3792	174	5631	172	13176	186	10993	180	2370	177	1977	111	8912	108	247254	108	234871	109	17178	108	239002	108	262461	108	223245
168	4890	167	35568	167	35568	168	3903	177	11941	174	4564	186	15238	186	14937	186	14951	188	4088	186	14937	188	4559	177	2696	176	3696	174	4545	188	2945	186	11742	178	3007	112	13979	109	16734	109	16254	110	45549	109	16344	109	18789	109	16440
170	2031	168	4051	168	4051	170	2245	178	2799	176	3374	188	4903	188	4795	188	4135	190	5849	188	4795	190	4673	178	2950	177	1416	176	3038	190	2880	188	2700	180	4198	113	7009	110	58936	110	43726	111	10981	110	59435	110	43450	110	47776
172	11179	170	2432	170	2432	172	8478	180	2333	177	6421	190	4939	190	4924	190	5971	192	2350	190	4924	192	2381	180	5048	178	2099	177	2923	192	1194	190	3096	182	489	114	8037	111	10712	111	10892	112	12058	111	10529	111	11317	111	10258
174	3613	172	10891	172	10891	174	3612	182	261	178	3052	192	2529	192	2559	192	2467	193	57	192	2559	193	177	182	711	180	4237	178	1827	195	125990	192	1478	186	26706	115	13789	112	12446	112	14737	113	9433	112	12068	112	13853	112	13260
176	3857	174	4264	174	4264	176	2178	184	99	180	3375	193	194	193	213	193	11	195	112549	193	213	195	155498	186	25356	186	26405	180	8778	196	12865	195	131868	188	4762	116	13269	113	8041	113	8529	114	7092	113	7861	113	10016	113	8704
177	6731	176	2872	176	2872	177	4513	186	11519	182	132	195	166585	195	163725	195	125803	196	13045	195	163725	196	18054	188	5423	188	6352	182	742	202	1664	196	13515	190	5596	117	36492	114	6918	114	7616	115	19427	114	7026	114	6945	114	7554
178	2812	177	4588	177	4588	178	2736	188	2951	184	118	196	19188	196	18708	196	15306	198	2872	196	18708	202	2871	190	5599	190	6250	184	429	204	1894	202	2026	192	2228	118	18422	115	15407	115	16544	116	13530	115	15701	115	18405	115	17056
180	5165	178	2984	178	2984	180	3115	190	3196	186	13536	202	3014	200	19	198	1752	202	3136	200	19	204	4884	192	2606	192	3319	186	20500	208	145	204	2281	193	406	119	8845	116	13294	116	14586	117	43693	116	13107	116	13982	116	13760
182	514	180	3727	180	3727	182	691	192	1674	188	4578	204	5257	202	3083	200	196	204	4062	202	3083	208	781	193	852	193	346	188	5357	210	1802	208	120	195	186164	120	4674	117	41561	117	41193	118	16333	117	40379	117	47125	117	39993
184	93	182	1408	182	1408	186	13886	193	305	190	5669	208	880	204	5226	202	2952	208	861	204	5226	210	2361	195	224223	195	206360	190	5319	212	100747	210	2289	196	27083	121	9522	118	18845	118	18630	119	11129	118	18934	118	18138	118	17744
186	15583	186	15319	186	15319	188	3476	195	93364	192	2121	210	2538	208	918	204	4096	210	1959	208	918	211	10855	196	25682	196	23080	192	3281	213	5934	211	6894	198	3852	122	7913	119	9503	119	10270	120	4864	119	9524	119	10979	119	10408
188	3874	187	354	187	354	190	4658	196	10721	193	107	211	11522	210	2469	206	264	212	119200	210	2469	212	109234	198	4242	200	224	193	99	214	770	212	88169	200	206	123	7842	120	5769	120	4796	121	14905	120	5746	120	6007	120	4909
190	5225	188	4315	188	4315	192	2215	202	2806	195	119962	212	117193	211	11579	208	661	213	7526	211	11579	213	9605	200	156	202	3804	195	133006	216	12301	213	6331	202	2440	124	28381	121	10505	121	11415	122	8092	121	10427	121	13507	121	12110
192	2595	190	5140	190	5140	193	862	204	2514	196	14054	213	10263	212	116740	210	2055	214	308	212	116740	214	1518	202	2883	204	4805	196	16289	222	2135	214	525	204	4725	125	10627	122	8664	122	8237	123	8881	122	8790	122	8050	122	8013
193	737	192	2715	192	2715	195	142136	208	401	200	522	214	1691	213	10104	212	116855	216	12251	213	10104	216	12964	204	5485	208	1141	198	6230	223	1389	216	14150	208	1124	126	2137	123	8051	123	8355	124	24050	123	8065	123	8604	123	8448
195	125057	193	839	193	839	196	16412	210	2008	202	3617	216	13007	214	1703	213	8842	218	861	214	1703	218	1569	208	1078	210	3047	200	193	224	2991	222	2152	210	3466	127	22716	124	26326	124	24227	125	11843	124	26092	124	23314	124	26240
196	14343	195	130423	195	130423	200	192	212	85973	204	6313	218	1668	216	13171	214	310	220	30	216	13171	222	4250	210	3580	211	23542	202	4333	227	424	223	6343	211	2246	128	4534	125	11311	125	11004	126	1126	125	11252	125	11901	125	10856
198	5193	196	15752	196	15752	202	3004	213	6682	206	721	222	4307	218	1641	216	12423	222	1464	218	1641	223	47195	211	7206	212	125294	204	6069	228	6250	224	4124	212	140122	129	9447	126	2032	126	2249	127	28804	126	1826	126	1902	126	2058
200	134	198	2182	198	2182	204	5796	214	1041	208	999	223	51171	222	4238	218	967	223	30655	222	4238	224	9339	212	144161	213	11862	205	869	230	1925	226	31	213	15255	130	10537	127	25453	127	24741	128	5325	127	25808	127	25721	127	24475
202	4131	200	558	200	558	206	387	216	12084	210	2583	224	9999	223	52931	220	422	224	6359	223	52931	226	1007	213	15797	214	1865	206	1605	231	685	227	326	214	812	131	7648	128	5502	128	5208	129	12791	128	5577	128	5875	128	5252
204	6551	202	3069	202	3069	208	1182	218	655	211	12537	226	831	224	10430	222	3247	226	920	224	10430	227	3738	214	1411	216	15392	208	698	232	5651	228	6469	216	13855	132	15271	129	11242	129	11884	130	7860	129	11241	129	13774	129	11815
206	471	204	7087	204	7087	210	1668	223	146428	212	77961	227	3829	226	859	223	31152	227	2980	226	859	228	7837	216	15397	218	1865	210	3141	233	1826	230	2175	218	1565	133	18277	130	9474	130	9482	131	9558	130	9531	130	9474	130	9401
208	836	206	631	206	631	211	12205	224	21282	213	7494	228	8283	227	3942	224	6319	228	7146	227	3942	230	4793	218	2200	220	280	212	114950	234	24571	231	819	220	761	135	336244	131	7895	131	8034	132	15452	131	8090	131	8683	131	8162
210	2491	208	606	208	606	212	72181	225	2277	214	1669	230	5167	228	8253	226	1311	230	4584	228	8253	231	3433	220	892	222	1810	213	9943	235	1447	232	5351	222	977	136	50698	132	16672	132	16512	133	20586	132	16540	132	16467	132	15581
211	7202	210	2902	210	2902	213	7615	226	901	216	13266	231	3686	230	5324	227	3296	231	2918	230	5324	232	7121	222	1439	223	10240	214	1666	236	2457	234	27095	223	17722	137	11593	133	21314	133	21393	135	371530	133	21119	133	21713	133	19896
212	79635	211	10371	211	10371	214	1088	228	4947	218	1325	232	7566	231	3525	228	7751	232	6947	231	3525	233	6171	223	14862	224	4436	216	15391	238	1790	235	1401	224	4969	138	9701	135	370146	135	383382	136	55566	135	357329	135	362130	135	354645
213	6542	212	74483	212	74483	216	12287	230	1852	220	315	233	6410	232	7543	229	87	233	4103	232	7543	234	23953	224	4956	226	1081	218	1627	239	496	236	2534	226	1204	139	21515	136	55727	136	56239	137	14284	136	55354	136	57046	136	53066
214	862	213	8428	213	8428	218	902	231	2462	222	943	234	25598	233	5851	230	4376	234	24027	233	5851	235	8498	226	1410	227	1606	220	197	240	8322	238	1982	227	1629	140	3452	137	13991	137	14361	138	8776	137	14015	137	16164	137	13269
216	13241	214	1315	214	1315	220	435	232	4538	223	65166	235	9111	234	25771	231	3712	235	6400	234	25771	236	6524	227	2541	228	6930	222	1559	242	2978	239	733	228	6527	141	7026	138	8901	138	9438	139	26264	138	8687	138	10220	138	9396
218	1055	216	13183	216	13183	222	508	233	3673	224	12119	236	6921	235	9352	232	6916	236	5372	235	9352	238	2497	228	7422	230	3388	223	19634	244	15151	240	8969	230	3218	142	3062	139	24270	139	25336	140	3895	139	24361	139	26444	139	23944
220	49	218	1945	218	1945	223	38814	234	15709	225	3018	238	2710	236	6779	233	5275	238	1916	236	6779	239	1779	229	197	231	5155	224	4425	245	1209	242	2734	231	4124	143	22070	140	4084	140	3663	141	8534	140	4019	140	4384	140	3724
222	623	220	47	220	47	224	8425	235	1453	226	1300	239	1939	238	2830	234	23713	239	6537	238	2830	240	12129	230	4098	232	7737	226	1146	246	1223	244	15000	232	7799	144	16012	141	7249	141	7995	142	3204	141	7243	141	7869	141	7978
223	68361	222	2799	222	2799	225	3840	236	1759	228	5907	240	13003	239	1921	235	6882	240	11798	239	1921	242	3452	231	5293	233	10385	227	1652	247	229	245	894	233	3082	145	20348	142	2983	142	3104	143	26348	142	2976	142	3639	142	3004
224	11615	223	46818	223	46818	226	1065	238	2332	230	2701	242	3671	240	13099	236	5261	242	3035	240	13099	244	41441	232	8233	234	24631	228	5761	248	2180	246	1263	234	27949	146	11814	143	22152	143	21732	144	17365	143	22077	143	22669	143	23110
225	3477	224	10525	224	10525	227	184	240	22814	231	4215	244	44409	242	3778	238	2250	244	34506	242	3778	245	5017	233	2821	235	3020	230	3198	252	1651	247	597	235	2444	147	14370	144	18343	144	17212	145	23028	144	18664	144	16957	144	16203
226	1252	225	3940	225	3940	228	4309	241	1298	232	6285	245	5371	244	43999	239	1372	245	3936	244	43999	246	2471	234	29403	236	3833	231	4194	254	1681	248	2428	236	3979	148	10322	145	22106	145	23091	146	11260	145	22072	145	25848	145	22569
228	5086	226	1066	226	1066	229	360	242	2795	234	31052	246	2584	245	5432	240	11496	246	2391	245	5432	247	1157	235	3243	238	2284	232	8709	256	2881	252	1506	238	1896	149	47902	146	11410	146	11868	147	15786	146	11460	146	11980	146	11474
230	2253	228	5569	228	5569	230	2058	244	4205	235	1638	247	1222	246	2616	242	3606	247	819	246	2616	248	3814	236	4081	239	610	233	3432	258	834	254	1729	239	1021	150	13781	147	14914	147	14606	148	12310	147	15047	147	17258	147	15282
231	6775	229	428	229	428	231	5993	246	1154	236	2033	248	4166	247	1281	243	466	248	2924	247	1281	250	3	238	2366	240	13468	234	25694	260	449	256	3024	240	13462	152	2119360	148	10691	148	9935	149	58295	148	10818	148	10448	148	10065
232	5977	230	2847	230	2847	232	5304	247	456	238	2509	252	7468	248	4059	244	31925	250	209	248	4059	252	6964	239	583	241	91	235	3706	261	17	258	684	242	2270	153	160705	149	51436	149	51717	150	15165	149	51594	149	60971	149	53288
233	2995	231	6778	231	6778	233	2871	248	2694	239	3077	254	2897	250	68	245	4012	252	5347	250	68	254	2708	240	13959	242	3434	236	3849	262	956	260	536	244	19923	154	21638	150	15050	150	15091	152	2056994	150	15082	150	15994	150	13840
234	21963	232	6586	232	6586	234	18887	252	923	240	12465	256	3993	252	7554	246	2566	254	2890	252	7554	256	3774	242	2930	243	854	237	3	264	232	262	1039	245	2426	155	15456	152	2089721	152	2185381	153	158006	152	2005770	152	2154689	152	2063943
235	1156	233	2267	233	2267	235	1823	254	2134	241	776	258	1982	254	2812	247	594	256	3466	254	2812	258	1885	244	19586	244	17705	238	1565	265	1479	264	326	246	2269	156	15097	153	151642	153	160430	154	22201	153	144243	153	164918	153	156027
236	2308	234	21816	234	21816	236	2121	256	2300	242	3304	260	1411	256	4024	248	3258	258	2214	256	4024	260	1284	245	3231	245	2077	239	671	266	24790	265	1223	247	858	157	9175	154	20079	154	20355	155	22021	154	19274	154	22738	154	20807
238	2350	235	2236	235	2236	238	2016	258	1497	244	4259	262	2382	258	1905	249	187	260	1615	258	1905	262	2263	246	2389	246	2211	240	11747	267	4214	266	24587	248	3710	158	19504	155	19484	155	20695	156	13642	155	19670	155	21275	155	19406
239	1592	236	2020	236	2020	239	704	260	715	246	1556	263	0	260	1500	250	554	262	2094	260	1500	263	19	247	966	247	1369	242	1814	268	7264	267	4374	249	461	159	7957	156	15803	156	16684	157	12274	156	15496	156	15692	156	14646
240	14516	238	2383	238	2383	240	9660	262	1321	247	780	264	782	262	2426	252	5770	264	778	262	2426	264	791	248	4103	248	3960	244	16746	269	11874	268	8022	250	105	160	13138	157	10695	157	11247	158	13300	157	10699	157	13577	157	11285
241	395	239	781	239	781	241	142	263	176	248	3014	265	3772	264	802	254	2787	266	40916	264	802	265	3453	249	1851	252	2190	245	1215	270	2419	269	11307	252	2439	161	12363	158	14771	158	14828	159	7970	158	14924	158	12594	158	16777
242	2526	240	12879	240	12879	242	2756	264	513	249	1958	266	45924	265	3496	256	3055	267	7275	265	3496	266	42794	250	359	254	3112	246	2000	273	289	270	2516	254	2632	162	15440	159	7024	159	7538	160	11417	159	7212	159	7646	159	8048
244	4790	241	479	241	479	244	4105	265	1722	250	694	267	9147	266	46691	258	2106	268	6954	266	46691	267	8492	252	2453	256	3758	247	542	274	244	273	346	256	3028	163	81105	160	12592	160	13004	161	13299	160	12431	160	12115	160	12318
245	37	242	3533	242	3533	245	57	266	37492	252	865	268	7106	267	9166	260	1566	269	6534	267	9166	268	6753	254	3411	258	2426	248	3441	276	1032	274	34	258	2288	164	17808	161	12641	161	13038	162	14124	161	12671	161	13628	161	13415
246	1270	244	3926	244	3926	246	1369	267	7306	254	2696	269	8295	268	7208	261	183	270	2054	268	7208	269	7721	256	3577	260	1574	249	1357	279	80695	276	961	260	1109	165	4749	162	16443	162	15753	163	111431	162	16455	162	16143	162	15634
247	1318	246	1661	246	1661	247	489	268	6114	256	2897	270	2857	269	8406	262	2268	272	1047	269	8406	270	2608	258	2708	262	2762	250	178	280	13253	279	85676	262	2774	166	13207	163	87638	163	95661	164	20056	163	88620	163	109686	163	97482
248	3396	247	1352	247	1352	248	2975	269	13237	258	2036	272	643	270	2894	263	164	273	1294	270	2894	272	712	259	67	264	1018	252	2058	281	1118	280	12964	264	677	167	27530	164	18888	164	20302	165	5134	164	18676	164	20903	164	19845
249	4121	248	4141	248	4141	249	3478	270	2945	260	1154	273	1385	272	738	264	704	274	1277	272	738	273	1260	260	1441	265	2324	254	1998	282	982	281	1346	265	3584	168	7121	165	5422	165	5966	166	12390	165	5402	165	5711	165	5177
250	910	249	4505	249	4505	250	849	272	483	262	1837	274	1081	273	1395	266	41449	276	2149	273	1395	274	990	261	216	266	47727	256	3415	284	770	282	1054	266	48661	169	14102	166	12793	166	13555	167	29354	166	12863	166	11339	166	14045
252	822	250	1276	250	1276	252	903	274	689	263	42	275	34	274	1098	267	7430	279	69179	274	1098	275	80	262	3031	267	9719	258	1093	286	428	284	862	267	10107	170	9502	167	29548	167	30117	168	5989	167	29531	167	26224	167	27954
254	2468	252	1026	252	1026	254	1927	276	1556	264	536	276	2200	275	103	268	7455	280	11494	275	103	276	2045	263	149	268	7442	260	1301	288	3470	286	879	268	7575	171	10177	168	7018	168	6491	169	16406	168	6943	168	5618	168	6157
256	2808	254	2193	254	2193	256	2931	279	84076	265	1762	279	136470	276	2191	269	8188	281	1251	276	2191	279	125831	264	724	269	7781	262	1547	289	381	288	3708	269	8376	172	23898	169	14811	169	13400	170	10271	169	15028	169	13604	169	14177
258	1640	256	2819	256	2819	258	1327	280	15943	266	41337	280	21487	279	138947	270	2155	282	1276	279	138947	280	19686	266	58506	270	2638	264	1154	290	1678	289	82	270	2462	173	8952	170	10894	170	10927	171	13018	170	11064	170	10941	170	10057
260	1108	257	83	257	83	260	796	281	1577	267	9586	281	2490	280	21967	272	1173	284	972	280	21967	281	2175	267	10884	272	645	265	1987	291	1509	290	1751	272	595	174	10712	171	11166	171	11516	172	21978	171	11523	171	13067	171	11686
262	1404	258	1900	258	1900	262	1188	282	1249	268	6748	282	1646	281	2552	273	1068	286	510	281	2552	282	1501	268	7819	273	365	266	40768	292	2127	291	1921	273	766	175	6944	172	23259	172	21830	173	8946	172	23059	172	19559	172	21142
263	723	259	196	259	196	263	469	284	1301	269	13467	284	1152	282	1768	274	1245	288	4664	282	1768	284	1114	269	9190	274	1122	267	6856	293	909	292	2284	274	849	176	7770	173	9044	173	8667	174	10985	173	9059	173	9102	173	8881
264	549	260	1426	260	1426	264	697	285	732	270	2698	286	879	284	1119	275	58	289	680	284	1119	286	750	270	2635	276	2073	268	8358	294	3147	293	583	276	2020	177	33965	174	11014	174	11621	175	6759	174	10889	174	10721	174	11011
265	3052	262	1520	262	1520	265	4151	286	511	272	1795	288	5102	286	939	276	2024	290	2856	286	939	288	4799	272	818	279	111323	269	12186	295	4597	294	3771	279	70452	178	8875	175	6430	175	6595	176	7326	175	6539	175	6587	175	6867
266	37982	263	679	263	679	266	27048	288	2932	273	317	289	1269	288	4913	279	72049	291	2116	288	4913	289	1185	273	860	280	17012	270	2707	296	30292	295	3587	280	13162	179	4766	176	7478	176	7688	177	35077	176	7526	176	8201	176	7462
267	8017	264	999	264	999	267	6879	289	517	274	624	290	3682	289	1316	280	13270	292	2472	289	1316	290	3406	274	810	281	1706	272	343	302	1008	296	32713	281	2039	180	12722	177	33891	177	30361	178	9127	177	34160	177	28966	177	30005
268	7527	265	5574	265	5574	268	7417	290	1202	276	1737	291	2132	290	3677	281	1250	293	1224	290	3677	291	2013	275	24	282	2018	273	1320	303	692	302	938	282	1686	181	8424	178	9356	178	9437	179	5670	178	9592	178	8855	178	9381
269	17640	266	33690	266	33690	269	22483	291	1269	279	161131	292	2729	291	2180	282	1556	294	3349	291	2180	292	2570	276	2363	284	1530	274	1154	304	9569	303	147	284	1164	182	3029	179	5495	179	5753	180	11082	179	5627	179	5863	179	5486
270	3250	267	8687	267	8687	270	4397	292	1983	280	27513	293	231	292	2740	284	993	295	300	292	2740	293	212	279	104533	286	556	276	1804	305	1086	304	10519	286	699	183	8363	180	10412	180	10147	181	8349	180	10174	180	10335	180	11003
272	904	268	7712	268	7712	272	505	293	886	281	3305	294	3561	293	1093	286	390	296	35004	293	1093	294	3337	280	19826	288	5252	279	360442	306	827	305	978	288	3851	184	5059	181	8327	181	8135	182	3773	181	8425	181	8370	181	7939
273	69	269	16735	269	16735	273	282	294	2712	282	1784	295	46597	294	2472	288	4441	298	453	294	2472	295	3728	281	2993	289	735	280	60606	307	388	306	857	289	559	185	11245	182	3615	182	3536	183	9013	182	3638	182	3081	182	3420
274	607	270	3420	270	3420	274	472	295	3670	284	1779	298	600	295	46410	289	567	300	624	295	46410	296	39700	282	1753	290	2968	281	7833	308	3395	307	261	290	2880	186	30242	183	8306	183	8735	184	5444	183	8369	183	8464	183	9087
276	1441	272	1465	272	1465	275	67	296	27481	286	691	300	384	298	596	290	2645	302	1784	298	596	298	537	284	1455	291	2503	282	2375	309	110	308	3284	291	2085	187	10595	184	5883	184	5025	185	11772	184	5677	184	5779	184	5273
279	98660	273	555	273	555	276	1475	297	650	288	4695	302	1482	300	364	291	2063	303	1511	300	364	300	370	286	618	292	2894	284	1318	312	39	309	177	292	2857	188	10640	185	11957	185	11633	186	26280	185	11967	185	13736	185	11871
280	17464	274	634	274	634	279	180719	298	725	289	782	304	18445	302	1449	292	2326	304	14223	302	1449	302	1402	288	4457	293	1950	286	597	316	90	310	82	293	1435	189	5564	186	29400	186	27406	187	12778	186	29874	186	23620	186	26446
281	2012	275	236	275	236	280	30969	300	400	290	1449	305	2689	304	17872	293	940	305	2805	304	17872	304	17153	289	1055	294	3373	288	4547	320	344	312	49	294	1848	190	9983	187	11355	187	10704	188	9918	187	11465	187	11152	187	10303
282	1243	276	1375	276	1375	281	3958	302	1028	291	1514	306	896	305	2707	294	3579	306	1298	305	2707	305	2542	290	3253	295	957	289	389	321	10	316	275	296	36771	191	3839	188	11204	188	11055	189	5522	188	11379	188	10921	188	10751
284	896	279	64595	279	64595	282	1076	303	364	292	2716	307	182	306	914	295	2698	307	1343	306	914	306	840	291	2075	296	41498	290	2890	323	485	320	388	297	874	192	6891	189	5066	189	5506	190	9780	189	5062	189	5613	189	5041
286	586	280	12774	280	12774	284	1722	304	9192	293	2035	308	5248	307	171	296	32379	308	4395	307	171	307	149	292	3224	298	426	291	2731	324	208	321	417	298	949	193	6087	190	10280	190	9743	191	4177	190	10521	190	9068	190	9604
288	4033	281	1890	281	1890	285	21	305	1761	294	3341	309	198	308	5185	298	440	309	377	308	5185	308	4865	293	1637	300	184	292	2849	330	858	322	271	300	622	195	478655	191	3822	191	3975	192	5676	191	3813	191	4178	191	3962
289	411	282	1483	282	1483	286	2489	306	790	295	3500	310	383	309	229	300	832	310	310	309	229	309	213	294	3235	302	1418	293	339	332	446	324	77	302	1251	196	57809	192	6408	192	6547	193	5793	192	6484	192	5822	192	6193
290	1785	284	1080	284	1080	287	362	307	436	296	35759	312	227	310	365	302	2168	312	310	310	365	310	346	296	37781	304	16778	294	5237	334	1659	330	1438	303	2418	197	11293	193	6281	193	5757	195	460259	193	6235	193	5774	193	5815
291	2613	285	530	285	530	288	4166	308	2872	297	1989	315	1053	312	244	303	2313	316	1292	312	244	312	255	297	1856	305	2669	295	57513	336	8	332	536	304	13532	198	8667	195	481956	195	504248	196	51831	195	481018	195	479883	195	463672
292	2407	286	1148	286	1148	289	854	309	290	298	713	316	946	315	1038	304	12661	317	7	315	1038	315	1150	298	1149	306	1206	297	1435	337	475	334	1726	305	2731	199	7830	196	57993	196	59014	197	10668	196	57590	196	58747	196	55376
293	987	288	4486	288	4486	290	1510	310	327	300	922	317	86	316	946	305	2857	318	368	316	946	316	820	300	948	307	6	298	692	344	379	335	22	306	697	200	5753	197	10761	197	11548	198	7524	197	10799	197	11437	197	10863
294	3808	289	949	289	949	291	1959	312	228	302	1443	318	410	317	113	306	1393	319	164	317	113	317	110	302	1497	308	5918	300	565	345	654	337	417	307	1132	201	5186	198	6967	198	6136	199	9695	198	6811	198	5632	198	7174
295	2916	290	1610	290	1610	292	2250	316	1100	303	852	319	68	318	433	307	1279	320	606	318	433	318	391	303	2335	309	378	302	1349	346	2352	344	599	308	4140	202	8156	199	7883	199	8953	200	5523	199	7970	199	9640	199	9063
296	28065	291	2738	291	2738	293	2230	317	213	304	9527	320	470	319	57	308	4002	321	79	319	57	319	61	304	14386	310	312	303	456	347	420	345	880	309	345	203	6639	200	5814	200	5634	201	6422	200	5682	200	5641	200	5950
297	2029	292	2732	292	2732	294	5004	318	176	305	2057	321	120	320	462	309	237	322	658	320	462	320	448	305	3064	312	500	304	12519	350	19	346	2186	310	395	204	10960	201	6124	201	6486	202	7250	201	6059	201	6557	201	6108
298	1026	293	1334	293	1334	295	913	320	525	306	1090	322	531	321	178	310	313	323	79	321	178	321	85	306	708	316	1092	305	2049	351	6	348	133	312	640	205	14053	202	7855	202	7635	203	6003	202	7839	202	7774	202	7564
300	139	294	4036	294	4036	296	31531	321	222	307	980	324	558	322	510	312	179	324	623	322	510	322	510	307	1447	318	428	306	1017	353	53	350	34	314	85	206	5318	203	5921	203	6055	204	12676	203	5965	203	6027	203	6231
301	53	296	25073	296	25073	297	1751	322	434	308	2713	326	195	323	8	314	14	326	279	323	8	324	511	308	4488	319	33	308	5838	356	1752	355	535	316	1241	207	5807	204	14272	204	12651	205	17148	204	14225	204	13832	204	12259
302	1430	297	1819	297	1819	298	735	323	685	309	160	330	1129	324	576	316	885	329	1341	324	576	326	154	309	412	320	497	309	474	364	52	356	1545	318	416	208	3931	205	17092	205	15277	206	5585	205	17190	205	18786	205	15925
303	1118	298	950	298	950	300	684	324	275	310	646	332	820	326	190	317	109	330	1699	326	190	330	1031	310	582	321	129	310	165	366	71	358	39	319	65	209	5619	206	5733	206	5105	207	7151	206	5756	206	5359	206	5434
304	10685	300	1007	300	1007	302	1058	326	116	312	412	333	238	330	1067	318	113	332	1165	330	1067	332	782	312	532	322	686	312	512	368	202	360	1	320	828	210	8768	207	6147	207	6976	208	4157	207	6353	207	7501	207	6871
305	1863	301	205	301	205	303	1031	328	180	316	1419	334	2792	332	762	319	54	333	239	332	762	333	241	314	282	323	77	316	1500	370	122	364	1	321	108	211	32607	208	3965	208	4068	209	5860	208	4083	208	4317	208	4059
306	1170	302	1531	302	1531	304	10677	330	405	317	481	335	329	333	203	320	554	334	2588	333	203	334	2617	316	1575	324	453	317	546	377	5	366	129	322	692	212	208894	209	5902	209	6352	210	6109	209	6008	209	6634	209	6028
307	583	303	2807	303	2807	305	2394	332	687	318	644	336	223	334	2852	321	71	335	254	334	2852	335	284	317	215	326	47	318	243	378	62	370	77	323	48	213	36678	210	6432	210	6971	211	17628	210	6408	210	6706	210	6585
308	3511	304	11695	304	11695	306	1231	333	285	319	187	338	190	335	356	322	605	336	404	335	356	336	199	318	555	330	1654	320	834	380	12	377	34	324	362	214	7760	211	37867	211	46224	212	188935	211	37054	211	37800	211	30510
309	321	305	2525	305	2525	307	1020	334	2231	320	484	342	237	336	205	323	201	338	33	336	205	338	197	320	983	332	996	321	174	385	168	380	59	326	100	215	13743	212	209254	212	189851	213	34096	212	210512	212	172487	212	188191
310	467	306	1024	306	1024	308	2950	335	283	321	26	344	1388	338	196	324	515	340	99	338	196	342	230	321	217	334	2707	322	626	386	5570	385	153	330	1903	216	14355	213	36765	213	34554	214	8104	213	36340	213	34656	213	32878
312	414	307	791	307	791	309	270	336	333	322	518	345	1454	342	260	326	444	342	144	342	260	344	1306	322	931	335	61	323	296	387	1412	386	5252	332	1343	217	35909	214	8955	214	8153	215	17607	214	9034	214	9009	214	7656
316	760	308	3783	308	3783	310	155	337	100	323	41	346	1887	344	1360	328	27	343	229	344	1360	345	1327	324	278	336	185	324	508	388	12972	387	1413	333	275	218	10398	215	15307	215	16673	216	13406	215	15418	215	15751	215	15202
317	133	309	743	309	743	312	317	342	60	324	475	347	55	345	1628	329	1350	344	950	345	1628	346	1796	326	1	340	2	327	475	389	1349	388	12826	334	3135	219	7757	216	15547	216	15576	217	38962	216	15564	216	14875	216	14906
318	633	310	399	310	399	314	171	343	327	328	367	348	548	346	1719	330	1675	346	3359	346	1719	347	41	328	191	342	254	330	1234	390	1879	389	1721	335	185	220	5195	217	36796	217	37162	218	11008	217	36616	217	39891	217	36630
319	4	312	253	312	253	316	1280	344	714	330	1724	349	56	347	71	332	1375	347	126	347	71	348	538	330	1858	343	475	332	846	400	103	390	1602	336	265	221	5001	218	11332	218	11581	219	9469	218	11485	218	10838	218	11541
320	705	314	356	314	356	317	686	345	520	332	985	350	220	348	485	333	300	348	488	348	485	349	30	332	1485	344	618	333	190	402	778	394	49	338	321	222	2759	219	8586	219	9226	220	4353	219	8763	219	8518	219	8908
321	322	316	1783	316	1783	318	443	346	2311	333	120	351	103	349	83	334	2349	349	71	349	83	350	182	333	184	345	1491	334	2451	406	398	398	88	344	1711	223	71471	220	5256	220	4975	221	6886	220	5299	220	5211	220	5041
322	462	317	849	317	849	319	231	347	355	334	2488	352	93	350	226	335	195	350	398	350	226	351	185	334	3374	346	1859	336	534	407	300	400	171	345	153	224	16157	221	6172	221	6796	222	9977	221	6201	221	8047	221	6751
323	444	318	492	318	492	320	631	348	538	335	117	356	1905	351	78	336	454	351	185	351	78	352	99	335	200	347	419	337	503	408	736	402	805	346	2667	225	8388	222	9241	222	7293	223	67103	222	9439	222	9078	222	6222
324	178	319	185	319	185	321	148	349	459	336	184	358	86	352	46	338	78	352	689	352	46	356	1761	336	379	348	406	338	374	409	181	406	378	347	109	226	3884	223	51618	223	50233	224	15015	223	51965	223	48826	223	58437
326	191	320	718	320	718	322	586	350	237	338	67	360	144	356	1850	340	17	354	203	356	1850	358	80	337	275	349	40	340	61	414	210	407	579	348	343	227	9027	224	14140	224	14847	225	10258	224	14024	224	13802	224	15075
330	1550	321	234	321	234	323	180	351	30	339	8	361	21	358	71	342	133	356	1942	358	71	360	148	338	166	350	272	342	82	420	477	408	488	349	70	228	14491	225	9071	225	8755	226	3756	225	8864	225	10889	225	8556
332	383	322	670	322	670	324	276	352	136	340	35	362	30	360	153	343	185	358	203	360	153	361	17	341	449	351	231	344	1610	424	21	409	5	350	381	229	7138	226	4281	226	3864	227	8951	226	4298	226	3614	226	3967
333	187	323	45	323	45	326	191	354	105	342	234	363	49	361	42	344	1052	360	230	361	42	362	21	342	72	352	19	345	849	428	786	412	237	351	251	230	6750	227	9078	227	8734	228	13528	227	9097	227	9226	227	9263
334	2262	324	382	324	382	328	221	356	1330	343	75	364	20	363	125	346	3331	361	29	363	125	363	47	344	1504	354	37	346	2499	429	1786	416	259	352	638	231	12917	228	14311	228	14455	229	7293	228	13985	228	14674	228	13537
335	517	326	330	326	330	330	1500	357	143	344	1053	365	57	365	36	347	66	362	268	365	36	364	18	346	2870	356	2260	348	575	430	9741	420	395	354	208	232	11338	229	7417	229	7139	230	7519	229	7242	229	7902	229	7204
336	188	328	434	328	434	332	617	358	146	345	3211	366	104	366	73	348	609	364	85	366	73	365	53	347	832	358	72	350	292	431	1786	424	32	355	878	233	12046	230	7440	230	7238	231	14048	230	7304	230	6946	230	7031
338	118	330	1850	330	1850	333	250	360	50	346	961	370	635	370	654	349	202	365	15	370	654	366	97	348	414	360	143	351	184	434	147	428	1025	356	1415	234	38192	231	14992	231	15427	232	10483	231	14730	231	13901	231	14059
340	54	332	616	332	616	334	1907	362	53	348	753	376	106	376	56	350	194	366	289	376	56	368	22	350	508	362	125	352	1744	435	2	429	1851	358	130	235	10144	232	12950	232	12391	233	8636	232	12795	232	13286	232	10981
342	173	333	232	333	232	335	183	363	559	349	110	378	172	378	183	351	142	367	5	378	183	370	581	351	322	364	92	354	554	438	87	430	10411	360	391	236	6243	233	8930	233	15129	234	36586	233	8848	233	11905	233	11757
343	276	334	2565	334	2565	336	275	364	119	350	444	379	347	379	387	352	361	368	42	379	387	376	109	352	742	365	6	355	58	442	94	431	1738	362	225	237	6512	234	41081	234	36533	235	12015	234	41114	234	38320	234	35389
344	856	335	230	335	230	338	77	365	38	352	175	380	131	380	125	354	150	370	358	380	125	378	161	354	266	366	251	356	1426	455	83	435	53	364	108	238	5667	235	11514	235	12243	236	5453	235	11560	235	12247	235	11390
345	2187	336	390	336	390	343	126	367	130	355	26	382	129	382	139	356	1744	378	119	382	139	379	331	356	1430	368	459	358	0	460	1049	436	11	365	150	239	6008	236	5724	236	5846	237	5782	236	5492	236	6529	236	5891
346	660	337	490	337	490	344	905	370	282	356	1757	383	33	383	35	358	60	379	157	383	35	380	121	358	225	370	620	359	9	461	585	438	100	366	256	240	16841	237	5762	237	5894	238	5170	237	5823	237	5982	237	6416
347	192	338	91	338	91	345	1965	374	932	357	179	386	10801	386	11010	360	220	380	274	386	11010	382	119	360	372	377	273	360	306	462	40636	459	100	367	19	241	5810	238	6204	238	6598	239	8996	238	6377	238	6293	238	5805
348	631	342	74	342	74	346	1016	376	17	358	182	387	1016	387	1279	361	19	381	8	387	1279	383	88	362	262	379	43	362	162	463	17221	460	1172	368	59	242	8295	239	7181	239	7226	240	14105	239	7121	239	7035	239	8580
349	55	343	296	343	296	347	127	377	65	360	145	388	18533	388	17463	362	567	385	1005	388	17463	386	10113	364	112	380	399	364	274	464	11123	462	41196	378	213	243	4423	240	15348	240	13671	241	5325	240	15530	240	12931	240	12680
350	239	344	1142	344	1142	348	498	378	180	362	183	389	2934	389	3274	365	59	386	8522	389	3274	387	1044	365	41	383	27	365	122	465	3576	463	17952	379	360	244	15569	241	5843	241	6022	242	9345	241	5910	241	6465	241	6064
351	579	345	1592	345	1592	350	626	379	83	364	141	390	2083	390	2107	366	346	388	15316	390	2107	388	17293	366	170	386	10912	366	228	466	1174	464	10422	380	450	245	6671	242	9829	242	8677	243	6331	242	9634	242	9565	242	8242
352	831	346	1429	346	1429	352	406	380	196	365	113	391	5799	391	5676	367	162	389	1937	391	5676	389	2886	368	94	387	2706	368	19	475	6	465	3845	382	188	246	4160	243	5927	243	4978	244	12634	243	5895	243	6900	243	5291
354	185	347	47	347	47	356	1158	381	44	366	194	392	1386	392	1326	370	571	390	2403	392	1326	390	1879	369	111	388	14808	370	2146	478	341	466	1279	385	1233	247	3542	244	13691	244	16746	245	5549	244	13420	244	13469	244	14991
356	1358	348	670	348	670	360	132	382	13	367	398	393	100	393	18	378	45	391	7229	393	18	391	5581	378	272	389	1998	377	84	480	187	467	5	386	9037	248	6965	245	5523	245	6270	246	3378	245	5565	245	5425	245	6157
358	144	349	22	349	22	361	10	385	582	369	81	397	18	397	20	380	292	392	1540	397	20	392	1321	379	341	390	2231	378	316	483	15	468	20	387	1343	249	9319	246	4119	246	4296	247	3391	246	4081	246	3746	246	3841
360	377	350	435	350	435	364	163	386	8908	370	518	400	151	400	134	385	973	393	409	400	134	393	141	380	435	391	4230	379	981	487	3	477	135	388	13339	250	3490	247	3752	247	3936	248	6973	247	3846	247	3784	247	4115
364	241	351	277	351	277	366	413	387	1612	376	194	403	887	402	900	386	8219	402	870	402	900	397	17	382	230	392	1503	380	216	488	177	478	53	389	1744	251	4063	248	7583	248	7808	249	13592	248	7577	248	7822	248	7710
366	148	352	487	352	487	367	122	388	12317	377	8	405	236	405	189	387	2374	403	101	405	189	399	180	385	1279	394	190	382	129	489	808	480	284	390	2445	252	4960	249	12156	249	11843	250	3725	249	12209	249	12599	249	10444
367	42	354	46	354	46	368	44	389	1593	378	129	406	830	406	1059	388	12991	405	159	406	1059	402	784	386	10428	400	70	383	206	491	253	489	1285	391	5370	253	3014	250	3433	250	3786	251	4641	250	3490	250	3776	250	3889
369	545	356	1349	356	1349	369	686	390	1948	379	121	407	625	407	1071	389	1197	406	918	407	1071	403	960	387	1293	402	39	385	785	496	32	491	173	392	1286	254	5664	251	3956	251	3855	252	4037	251	4086	251	4273	251	4397
370	800	357	141	357	141	370	1097	391	3704	380	34	408	2578	408	1496	390	2270	407	642	408	1496	405	220	388	16576	405	1429	386	8582			499	17	393	65	255	5971	252	4920	252	4984	253	2954	252	4938	252	4649	252	4849
376	363	358	241	358	241	376	118	392	1015	382	22	409	106	409	371	391	8042	408	2094	409	371	406	774	389	2604	406	743	387	2144					394	36	256	8711	253	3344	253	3199	254	5403	253	3420	253	3580	253	3624
377	68	360	392	360	392	377	157	393	108	385	852	416	102	416	91	392	1396	410	331	416	91	407	594	390	2555	407	822	388	10104					396	113	257	3537	254	5903	254	5450	255	8257	254	5741	254	5527	254	5075
378	208	362	134	362	134	378	232	394	12	386	9055	417	79	417	86	393	391	414	206	417	86	408	2439	391	5679	408	1158	389	2218					400	140	258	5816	255	6467	255	6805	256	7895	255	6404	255	6364	255	5830
379	540	364	244	364	244	379	191	396	188	387	1032	418	244	418	231	400	202	415	159	418	231	409	92	392	1892	409	289	390	1285					403	1068	259	3240	256	9143	256	9359	257	3596	256	9286	256	8569	256	8496
380	409	365	103	365	103	380	401	400	170	388	18383	419	485	419	439	402	900	416	190	419	439	416	89	393	104	414	113	391	3605					406	1912	260	2704	257	3978	257	3944	258	4754	257	3993	257	4228	257	3865
381	71	366	113	366	113	383	138	402	813	389	3386	420	216	420	217	403	230	418	343	420	217	417	74	394	9	416	128	392	1762					407	932	261	1577	258	4628	258	4723	259	4022	258	4652	258	5222	258	5191
383	162	368	5	368	5	385	340	404	437	390	3282	422	25	422	65	406	1039	419	20	422	65	418	187	396	68	422	28	393	375					408	1517	262	4741	259	3675	259	3723	260	2878	259	3697	259	3486	259	3875
385	526	369	1307	369	1307	386	8076	405	336	391	3326	424	252	425	148	407	402	420	164	425	148	419	623	400	131	423	67	394	195					409	27	263	2892	260	3561	260	3157	261	2173	260	3436	260	3074	260	3003
386	8186	370	515	370	515	387	2614	406	800	392	1063	426	320	426	67	408	1625	421	138	426	67	420	235	402	989	428	1237	397	82					414	464	264	2164	261	2388	261	2119	262	3396	261	2467	261	2010	261	2008
387	2359	376	75	376	75	388	13637	407	648	394	147	428	1176	428	1804	409	211	422	54	428	1804	422	19	404	86	430	11318	400	623					416	267	266	60859	262	3713	262	3979	263	2526	262	3799	262	4271	262	4561
388	14401	377	18	377	18	389	2793	408	721	396	157	430	11950	429	11108	410	65	424	159	429	11108	424	273	406	2032	431	903	401	92					418	393	267	15581	263	2382	263	2562	264	1844	263	2436	263	2509	263	2579
389	1607	378	109	378	109	390	3098	409	508	401	441	431	1567	431	1556	411	80	426	367	431	1556	426	297	407	656	434	113	404	579					420	72	268	10731	264	1897	264	2076	265	9113	264	1924	264	1917	264	1991
390	2032	379	305	379	305	391	7448	411	21	403	737	432	256	432	252	412	38	427	102	432	252	428	1101	408	1647	435	105	405	276					422	5	269	14748	265	5974	265	5795	266	43849	265	5817	266	57529	266	58516
391	9281	380	192	380	192	392	2463	412	74	405	345	434	460	433	180	413	52	429	2028	433	180	430	11089	410	127	436	190	406	633					424	548	270	5437	266	55560	266	56176	267	13144	266	55463	267	14920	267	14229
392	2709	382	48	382	48	393	158	414	107	406	624	435	285	434	64	414	114	430	8439	434	64	431	1427	414	386	437	352	407	2198					427	457	271	5563	267	15208	267	14691	268	10690	267	15171	268	11150	268	10577
393	330	385	800	385	800	394	21	415	44	407	935	436	195	435	76	416	654	431	1429	435	76	432	267	416	337	442	458	408	466					428	495	272	5074	268	11867	268	11170	269	19129	268	11492	269	17450	269	15671
394	107	386	10220	386	10220	398	123	416	41	408	672	437	71	436	376	418	212	432	183	436	376	434	475	417	194	458	22	410	160					429	1969	273	3614	269	13851	269	17227	270	5895	269	13341	270	5980	270	5590
396	99	387	200	387	200	406	774	418	104	409	280	444	342	437	63	419	7	433	137	437	63	435	272	418	406	460	1656	413	148					430	9901	274	2346	270	5389	270	5906	271	7914	270	5283	271	6476	271	6066
400	107	388	14507	388	14507	407	470	421	3	416	25	452	12	439	59	420	227	434	89	439	59	436	169	422	39	461	91	414	388					431	1235	275	1055	271	6414	271	5768	272	5589	271	6359	272	6349	272	5479
401	415	389	2619	389	2619	408	1207	422	115	417	368	455	48	442	187	421	399	435	121	442	187	437	66	424	564	462	51750	416	351					432	39	276	3655	272	5317	272	5408	273	3512	272	5349	273	3886	273	3839
402	199	390	2828	390	2828	409	592	424	88	418	185	458	125	444	370	424	297	436	303	444	370	444	317	427	560	463	21151	418	207					434	116	277	2251	273	3359	273	3952	274	2212	273	3193	274	2710	274	2420
404	110	391	6851	391	6851	411	190	426	246	422	37	459	94	455	44	429	2522	437	73	455	44	452	14	428	820	464	14480	420	415					435	309	279	540538	274	2463	274	2503	275	2180	274	2505	275	1436	275	1768
405	248	392	1830	392	1830	413	15	427	13	424	178	460	1445	458	111	430	8052	439	99	458	111	455	67	430	11507	465	4223	422	228					436	161	280	93478	275	1961	275	1477	276	2422	275	1970	276	3119	276	3315
406	739	393	302	393	302	414	43	428	1544	426	5	461	354	459	250	431	1474	441	191	459	250	456	131	431	1083	466	1593	424	273					437	244	281	14092	276	3311	276	3496	277	2586	276	3324	277	2643	277	2270
407	440	401	463	401	463	416	119	429	12651	427	276	462	55441	460	1455	432	174	442	28	460	1455	459	116	432	49	467	45	426	448					438	250	282	4157	277	1844	277	2323	279	512751	277	1812	279	561777	279	527091
408	1163	405	248	405	248	417	367	431	1602	428	2111	463	22831	461	511	433	101	443	84	461	511	460	1297	434	174	471	54	428	803					439	34	283	2575	279	587330	279	509472	280	86337	279	587111	280	98082	280	91236
413	5	406	862	406	862	419	254	432	143	430	12508	464	15116	462	54186	435	390	444	841	462	54186	461	219	435	124	476	246	429	3798					441	552	284	3416	280	102341	280	88856	281	14423	280	102400	281	14702	281	14077
414	39	407	240	407	240	420	254	433	514	431	1554	465	4534	463	22614	436	252	452	44	463	22614	462	52139	436	342	479	168	430	12773					444	185	285	3703	281	15210	281	13517	282	3965	281	14853	282	3543	282	3892
416	644	408	1266	408	1266	421	106	434	150	432	218	466	1906	464	14994	437	24	455	91	464	14994	463	21432	437	311	480	420	431	1686					452	115	286	3058	282	4540	282	3839	283	1745	282	4518	283	2863	283	2974
418	121	409	520	409	520	426	164	435	90	433	29	467	198	465	4466	439	99	458	157	465	4466	464	14159	438	254	481	52	432	401					454	60	287	6058	283	2648	283	2370	284	4055	283	2631	284	3698	284	3846
419	302	414	6	414	6	428	295	436	126	434	163	468	232	466	1812	443	70	459	188	466	1812	465	4222	439	49	482	81	433	176					456	72	288	8959	284	3980	284	4078	285	4516	284	3886	285	5321	285	4087
420	196	416	293	416	293	429	1704	437	85	435	341	475	132	467	197	444	447	460	1975	467	197	466	1788	440	182	488	479	434	296					457	374	289	3657	285	3699	285	4634	286	4336	285	3744	286	3818	286	3831
423	44	418	87	418	87	430	10754	438	139	436	150	477	180	468	77	452	84	461	251	468	77	467	187	441	26	489	642	435	525					458	362	290	3962	286	3886	286	3765	287	6770	286	3880	287	6048	287	6084
424	137	419	15	419	15	431	1520	444	489	437	41	478	349	475	143	455	90	462	48249	475	143	468	108	442	29	490	269	436	358					459	149	291	4812	287	5953	287	6364	288	9053	287	5864	288	9658	288	9060
426	12	420	136	420	136	432	645	454	158	440	17	479	121	477	217	458	88	463	19275	477	217	475	123	444	445	492	41	437	174					460	3290	292	4022	288	10460	288	10083	289	4470	288	10231	289	4076	289	3737
428	668	421	37	421	37	433	5	458	341	452	236	480	308	478	326	459	322	464	13197	478	326	477	220	450	77	495	28	438	52					461	3399	293	3856	289	2953	289	4038	290	3900	289	2997	290	3735	290	3244
429	3790	424	147	424	147	434	199	459	32	456	38	481	14	479	86	460	1729	465	4427	479	86	478	320	452	154	500	22	440	434					462	39147	294	6119	290	4435	290	3985	291	6153	290	4359	291	4418	291	4900
430	8759	426	334	426	334	435	4	460	1562	459	284	482	186	480	291	461	259	466	1752	480	291	479	109	454	62			441	430					463	16687	296	54497	291	5889	291	5182	292	3996	291	5912	292	4116	292	4164
431	972	428	1779	428	1779	436	45	461	3757	460	1693	484	40	482	212	462	45338	467	221	482	212	480	265	456	326			442	237					464	12284	297	9677	292	3990	292	3367	293	1886	292	3976	293	3420	293	3300
432	464	430	9373	430	9373	437	63	462	31488	461	2707	488	281	486	6	463	17296	468	248	486	6	481	14	457	290			443	210					465	3501	298	3808	293	3543	293	2861	294	7661	293	3417	294	7719	294	7157
433	63	431	53	431	53	438	101	463	14536	462	44888	489	1021	488	386	464	13433	470	1	488	386	482	177	458	586			444	408					466	1436	299	2141	294	7140	294	7852	295	3718	294	7285	296	50215	296	48604
434	134	432	88	432	88	444	562	464	9670	463	18936	490	350	489	967	465	4010	472	128	489	967	484	24	459	613			452	284					469	120	300	2678	295	4574	295	1169	296	41650	295	4509	297	10584	297	10249
435	101	433	114	433	114	451	91	465	3120	464	13677	491	121	490	366	466	1447	474	127	490	366	488	260	460	3234			453	32					470	235	301	1269	296	50973	296	49485	297	10166	296	50781	298	4128	298	4197
436	5	434	53	434	53	454	73	466	1018	465	3857	496	8	491	124	467	38	476	383	491	124	489	930	462	45671			455	67					472	115	302	3459	297	10108	297	8432	298	3939	297	10157	299	3556	299	3201
437	220	435	103	435	103	457	3	467	171	466	1704	497	40	496	8	468	238	478	1081	496	8	490	340	463	17864			456	154					473	47	303	3069	298	3802	298	4205	299	3887	298	3777	300	3774	300	3057
438	68	436	38	436	38	458	16	468	141	467	145			497	38	472	122	479	355	497	38	491	106	464	12763			458	625					474	184	304	18510	299	3158	299	3269	300	2972	299	3070	301	2370	301	1428
439	159	444	466	444	466	460	2604	471	35	468	135					474	121	480	365			496	7	465	3719			460	1594					477	191	305	4268	300	2718	300	2663	301	631	300	2738	302	3335	302	3298
441	455	453	165	453	165	461	3360	473	19	470	117					477	329	481	331			497	39	466	1410			461	2248					478	796	306	1831	301	1761	301	1602	302	3989	301	1745	303	3629	303	3924
443	20	456	192	456	192	462	33228	475	56	474	187					478	480	482	462					469	329			462	44181					479	347	307	1968	302	3824	302	3894	303	1845	302	3924	304	18444	304	17088
444	1832	459	604	459	604	463	12710	477	434	475	22					479	375	483	61					470	204			463	16855					480	702	308	5929	303	3376	303	4105	304	17327	303	3751	305	4810	305	4145
452	51	460	3074	460	3074	464	10459	478	140	478	615					480	546	484	171					472	143			464	13050					481	187	309	1530	304	19847	304	19703	305	2872	304	19424	306	2666	306	1908
453	152	461	2280	461	2280	465	2486	479	141	479	15					481	263	486	13					473	115			465	3249					482	115	310	1335	305	4154	305	4914	306	1849	305	4048	307	592	307	1452
454	1	462	35829	462	35829	466	1190	480	341	480	639					482	215	487	25					474	316			466	1689					486	267	311	780	306	2069	306	2204	307	1548	306	2092	308	6153	308	6117
455	40	463	13514	463	13514	467	313	481	72	481	165					484	313	488	156					476	91			467	327					487	36	312	1054	307	1479	307	1817	308	6394	307	1420	309	1475	309	1689
459	410	464	10762	464	10762	470	8	482	139	482	99					486	33	489	674					478	1302			468	138					488	250	313	1228	308	7464	308	6404	309	824	308	7534	310	1190	310	1146
460	3582	465	3269	465	3269	474	20	485	11	484	96					487	22	490	349					479	169			470	232					489	768	314	1979	309	1473	309	1818	310	1256	309	1488	311	1432	311	1157
461	561	466	1528	466	1528	475	86	486	94	485	8					488	224	491	142					480	444			472	133					490	169	315	1070	310	1258	310	1223	311	976	310	1305	312	1636	312	1604
462	39041	467	251	467	251	478	429	487	46	486	96					489	782	492	19					481	101			474	437					491	189	316	3049	311	1022	311	1054	312	1604	311	1066	313	1922	313	1529
463	14744	468	151	468	151	479	21	489	1021	488	420					490	343	493	90					483	197			475	296					494	40	317	1482	312	1474	312	1486	313	1712	312	1460	314	2157	314	2170
464	10158	472	66	472	66	480	268	490	177	489	823					491	97	496	74					484	201			477	216					496	249	318	1180	313	1646	313	1904	314	1787	313	1728	315	1488	315	1345
465	3310	474	346	474	346	481	56	491	72	490	190					493	157	497	122					486	317			478	930					498	75	319	660	314	1838	314	1986	315	2023	314	1782	316	3061	316	3222
466	1273	478	729	478	729	482	120	492	7	491	76					495	31	498	59					487	114			479	169							320	983	315	1245	315	1039	316	2565	315	1106	317	1948	317	1644
468	74	480	714	480	714	487	134	493	4	492	45					496	174							488	181			480	1067							321	535	316	3235	316	3144	317	1857	316	3213	318	968	318	1136
469	47	482	213	482	213	488	267	496	21	495	39					497	146							489	644			481	1							322	1373	317	1941	317	1841	318	1510	317	1947	319	741	319	679
470	125	484	124	484	124	489	701	499	90	498	4					498	108							490	559			482	298							323	546	318	1090	318	1080	319	795	318	1103	320	1046	320	1108
473	16	486	38	486	38	490	162			500	23					500	0							491	157			483	122							324	1124	319	585	319	909	320	769	319	602	321	663	321	850
474	296	488	278	488	278	492	43																	494	120			484	552							325	472	320	1198	320	800	321	672	320	1159	322	1099	322	1028
475	135	489	577	489	577	496	49																	496	156			485	16							326	765	321	916	321	565	322	992	321	918	323	702	323	951
478	541	490	41	490	41																			497	19			486	253							327	1124	322	1336	322	1249	323	1024	322	1346	324	522	324	824
479	73	492	171	492	171																							487	158							328	646	323	852	323	1094	324	598	323	852	325	772	325	461
480	477	493	164	493	164																							488	518							329	888	324	1073	324	861	325	717	324	1125	326	745	326	840
481	166	496	141	496	141																							489	1106							330	2469	325	415	325	534	326	344	325	428	327	1551	327	1341
482	458	497	17	497	17																							490	589							331	379	326	678	326	587	327	1004	326	675	328	1512	328	1097
484	284	500	17	500	17																							491	90							332	2914	327	1211	327	1384	328	1683	327	1261	329	1743	329	1279
485	36																											493	145							333	1229	328	1177	328	1379	329	999	328	1211	330	2384	330	2661
486	61																											494	154							334	3693	329	510	329	1054	330	2916	329	501	331	1538	331	1496
487	36																											497	99							335	1349	330	3617	330	2744	331	1607	330	3557	332	1726	332	2001
488	303																																			336	804	331	1338	331	1441	332	1628	331	1444	333	1021	333	870
489	538																																			337	505	332	1722	332	1714	333	598	332	1794	334	3683	334	3497
490	222																																			338	783	333	800	333	387	334	2802	333	754	335	1311	335	1267
491	96																																			339	430	334	3516	334	2918	335	1566	334	3438	336	724	336	896
492	101																																			340	466	335	1364	335	1112	336	585	335	1349	337	583	337	517
497	206																																			341	647	336	905	336	576	337	276	336	949	338	752	338	576
500	15																																			342	848	337	368	337	292	338	864	337	363	339	610	339	465
																																				343	1123	338	491	338	692	339	799	338	520	340	526	340	502
																																				344	1386	339	403	339	517	340	265	339	384	341	444	341	601
																																				345	2197	340	371	340	535	341	479	340	346	342	815	342	789
																																				346	1774	341	411	341	500	342	826	341	414	343	992	343	1081
																																				347	337	342	923	342	734	343	307	342	933	344	1501	344	1445
																																				348	1243	343	1297	343	1085	344	1838	343	1197	345	2686	345	2419
																																				349	786	344	1229	344	1908	345	2057	344	1261	346	2228	346	2014
																																				350	465	345	3698	345	2081	346	1826	345	455	347	560	347	740
																																				351	443	347	744	346	2468	347	574	346	3162	348	1512	348	885
																																				352	739	348	1233	347	446	348	994	347	731	349	711	349	563
																																				353	286	349	481	348	805	349	637	348	1196	350	677	350	676
																																				354	456	350	632	349	513	350	866	349	477	351	586	351	552
																																				355	287	351	431	350	695	351	726	350	702	352	579	352	830
																																				356	3343	352	721	351	713	352	701	351	419	353	136	353	388
																																				357	959	353	397	352	1023	353	397	352	658	354	634	354	422
																																				358	563	354	414	353	224	354	309	353	441	355	784	355	427
																																				359	122	355	454	354	464	355	943	354	421	356	3500	356	3099
																																				360	695	356	3299	355	672	356	2875	355	469	357	1228	357	1036
																																				361	367	357	929	356	3002	357	794	356	3255	358	601	358	613
																																				362	398	358	732	357	608	358	790	357	1033	359	269	359	324
																																				363	383	359	455	358	628	359	440	358	666	360	668	360	565
																																				364	308	360	376	359	311	360	422	359	380	361	414	361	555
																																				365	318	361	455	360	608	361	436	360	418	362	363	362	451
																																				366	176	362	401	361	600	362	474	361	387	363	369	363	514
																																				367	194	363	427	362	287	363	422	362	426	364	210	364	490
																																				368	474	364	239	363	590	364	413	363	459	365	320	365	330
																																				369	1092	365	231	364	354	365	520	364	257	366	137	366	267
																																				370	589	366	251	365	224	366	223	365	235	367	455	367	371
																																				371	17834	367	315	366	313	367	453	366	279	368	268	368	425
																																				372	6813	368	492	367	284	369	2098	367	325	369	2104	369	1607
																																				373	4837	369	1457	368	231	370	587	368	547	371	29744	370	469
																																				374	2383	370	248	369	2161	371	28178	369	1436	372	10989	371	23842
																																				375	531	371	22450	370	1136	372	9284	371	22736	373	6637	372	8639
																																				376	179	372	8351	371	22524	373	7498	372	8404	374	2765	373	5855
																																				377	247	373	5197	372	8218	374	1990	373	5156	375	846	374	2913
																																				378	182	374	2373	373	5897	375	711	374	2388	376	496	375	761
																																				379	774	375	569	374	2438	376	537	375	557	377	648	376	259
																																				380	398	376	322	375	679	377	348	376	348	378	510	377	291
																																				381	65	377	245	376	528	378	303	377	220	379	372	378	395
																																				382	342	378	253	377	261	379	589	378	262	380	186	379	609
																																				383	26	379	578	378	323	380	283	379	609	381	357	380	277
																																				384	836	380	416	379	466	381	180	380	410	382	201	381	116
																																				385	330	381	221	380	260	382	200	381	231	383	372	382	141
																																				386	13476	382	228	381	186	383	387	382	222	384	404	383	442
																																				387	2791	383	267	382	120	384	620	383	243	385	1564	384	773
																																				388	30038	384	280	383	168	385	1037	384	264	386	11598	385	1328
																																				389	7597	385	1617	384	673	386	10433	385	1360	387	4658	386	12302
																																				390	7393	386	11857	385	754	387	8156	386	11925	388	32901	387	2659
																																				391	24024	387	2461	386	12821	388	25248	387	2237	389	9904	388	28657
																																				392	4839	388	34258	387	4000	389	6882	388	34812	390	7718	389	8730
																																				393	529	389	8034	388	31337	390	6906	389	7766	391	23128	390	6809
																																				394	429	390	8198	389	9143	391	21624	390	8063	392	5950	391	21715
																																				395	61	391	23818	390	7845	392	5446	391	24452	393	892	392	5249
																																				396	275	392	5753	391	22217	393	886	392	5783	394	184	393	847
																																				397	364	393	906	392	5304	394	468	393	891	395	204	394	390
																																				398	128	394	241	393	859	396	78	394	214	396	80	395	199
																																				399	171	396	337	394	260	397	292	396	295	397	189	396	174
																																				400	412	397	16	395	182	398	325	397	18	398	99	397	287
																																				401	338	398	247	396	50	399	244	398	265	399	285	398	290
																																				403	1251	399	454	397	290	400	460	399	450	400	371	399	301
																																				404	1212	400	470	398	333	401	491	400	447	401	475	400	530
																																				405	1666	401	82	399	123	402	653	401	56	402	189	401	281
																																				406	1913	402	971	400	453	403	2636	402	957	403	2025	402	717
																																				407	1503	403	1305	401	732	404	1859	403	1332	404	1677	403	1996
																																				408	2174	404	1275	402	964	405	1173	404	1304	405	2612	404	1435
																																				409	285	405	1210	403	930	406	1377	405	1352	406	853	405	1018
																																				410	269	406	2821	404	1665	407	845	406	2742	407	1261	406	2081
																																				412	284	407	2276	405	1578	408	1915	407	2297	408	1781	407	1630
																																				413	682	408	505	406	1572	409	723	408	408	409	641	408	1851
																																				414	682	409	277	407	1223	410	217	409	298	410	160	409	332
																																				415	326	410	342	408	1500	412	501	410	370	411	377	410	266
																																				416	444	411	223	409	366	413	212	411	240	412	317	411	323
																																				417	259	412	239	410	111	414	923	412	186	413	778	412	217
																																				418	487	413	285	411	92	415	346	413	317	414	546	413	506
																																				419	2033	414	543	412	515	416	296	414	548	415	289	414	644
																																				420	651	415	279	413	187	417	110	415	284	416	402	415	515
																																				421	178	416	455	414	884	418	583	416	422	417	291	416	364
																																				422	268	417	211	415	324	419	2317	417	224	418	1049	417	107
																																				423	306	418	482	416	714	420	683	418	487	419	2508	418	812
																																				424	170	419	1770	417	250	422	407	419	1784	420	824	419	2208
																																				425	376	420	595	418	514	424	478	420	593	421	233	420	772
																																				426	258	421	232	419	2395	425	213	421	233	422	124	421	205
																																				428	847	422	306	420	839	426	362	422	290	423	118	422	275
																																				429	2804	423	172	421	375	427	459	423	162	424	292	423	294
																																				430	10399	424	247	422	218	428	407	424	274	425	168	424	362
																																				431	2798	425	249	423	127	429	3169	425	260	426	408	426	402
																																				432	585	426	268	424	303	430	10979	426	266	427	96	427	999
																																				433	228	427	472	425	209	431	1631	427	479	428	1474	429	2733
																																				434	247	428	1456	426	419	432	413	428	1457	429	11187	430	10640
																																				435	308	429	6004	427	876	433	567	429	5430	430	3007	431	2100
																																				436	729	430	7653	428	1969	434	174	430	7551	432	713	432	686
																																				437	286	431	901	429	3195	436	442	431	811	433	277	433	599
																																				438	279	432	440	430	9164	437	284	432	477	434	244	434	226
																																				440	1072	433	407	431	1734	439	299	433	398	435	299	435	519
																																				442	924	434	307	432	298	440	905	434	279	436	168	437	454
																																				443	47	435	279	433	280	441	425	435	276	437	276	438	131
																																				444	1979	436	273	434	267	442	310	436	265	438	373	439	647
																																				445	12642	437	62	435	163	443	39	437	69	439	589	440	378
																																				446	5935	438	416	436	517	445	21757	438	444	441	392	442	651
																																				447	3345	439	73	437	275	446	9099	439	60	442	530	443	290
																																				448	1655	440	423	438	262	447	6775	440	375	443	58	444	1247
																																				449	569	441	265	439	700	448	1912	441	242	444	1216	445	18654
																																				450	291	442	443	441	832	449	611	442	395	445	23717	446	8480
																																				451	95	443	122	442	251	450	404	443	135	446	11241	447	5717
																																				452	299	444	174	443	325	451	391	444	193	447	7887	448	1989
																																				453	25	445	17415	445	19481	452	100	445	17149	448	2998	449	715
																																				454	307	446	7684	446	8874	454	351	446	7775	449	623	450	439
																																				455	322	447	5685	447	5893	456	180	447	5772	450	389	451	127
																																				456	132	448	1900	448	2474	457	159	448	1900	451	157	452	157
																																				457	261	449	729	449	765	458	565	449	730	452	24	453	86
																																				458	293	450	195	450	343	459	291	450	159	453	242	454	187
																																				459	976	451	145	451	136	460	1234	451	147	454	136	455	331
																																				460	2007	452	112	452	136	461	8170	452	24	455	147	456	33
																																				461	3328	453	119	453	255	462	62072	453	173	457	319	457	367
																																				462	64672	454	106	454	203	463	27592	454	68	458	355	458	70
																																				463	29298	455	161	456	125	464	19548	455	139	459	858	459	562
																																				464	19649	456	82	457	48	465	6353	456	76	460	2789	460	882
																																				465	6406	457	57	458	206	466	2004	457	63	461	3420	461	4402
																																				466	2116	458	201	459	499	467	638	458	210	462	76451	462	63897
																																				467	552	459	989	460	3254	468	275	459	1009	463	34289	463	27415
																																				468	295	460	2123	461	1254	469	96	460	2059	464	23182	464	19066
																																				469	102	461	4357	462	72109	470	292	461	4842	465	7291	465	6136
																																				470	242	462	74472	463	30026	471	228	462	73546	466	3174	466	2395
																																				471	267	463	32666	464	18998	472	100	463	32709	467	697	467	561
																																				473	149	464	21001	465	6163	474	236	464	20653	468	310	468	225
																																				474	210	465	6585	466	2753	475	263	465	6371	469	135	469	233
																																				475	116	466	2443	467	465	476	477	466	2556	470	224	470	110
																																				476	442	467	422	468	443	477	215	467	387	471	166	471	31
																																				477	331	468	261	470	356	478	897	468	229	472	292	472	347
																																				478	621	469	91	471	201	479	633	469	61	474	251	473	25
																																				479	587	470	199	472	14	480	684	470	196	475	40	474	277
																																				480	997	471	73	473	158	481	610	471	81	476	574	475	216
																																				481	404	472	170	474	340	482	171	472	175	477	244	476	522
																																				482	175	474	371	475	209	483	204	474	365	478	1373	477	283
																																				483	240	475	8	476	265	484	101	475	9	479	248	478	995
																																				484	387	476	440	477	247	485	156	476	427	480	835	479	248
																																				485	283	477	245	478	905	486	128	477	273	481	747	480	1581
																																				486	15	478	1162	479	656	487	55	478	1131	482	356	481	16
																																				487	69	479	585	480	731	488	347	479	537	484	377	482	277
																																				488	551	480	676	481	449	489	1364	480	659	485	183	483	254
																																				489	1182	481	223	482	391	490	286	481	225	487	147	484	170
																																				490	278	482	323	483	13	491	154	482	318	488	390	485	291
																																				491	201	483	120	484	264	492	136	483	110	489	873	486	225
																																				492	197	484	157	485	11	493	50	484	145	490	333	487	162
																																				493	66	485	192	486	206	494	147	485	185	491	266	488	70
																																				494	39	486	104	487	132	496	141	486	60	492	23	489	1310
																																				495	48	487	5	488	404	497	59	487	5	494	169	490	290
																																				496	94	488	385	489	810	498	155	488	428	496	168	491	131
																																				497	96	489	913	490	538	499	16	489	934	497	106	492	156
																																				498	164	490	563	491	148	500	40	490	552	498	20	493	22
																																				500	12	491	58	492	107			491	64	499	170	494	66
																																						492	237	493	46			492	226	500	104	495	49
																																						493	37	494	92			493	41			496	92
																																						494	19	496	101			494	21			497	67
																																						495	71	498	77			495	79			498	62
																																						496	111	499	147			496	113			499	240
																																						497	37	500	71			497	17			500	45
																																						498	27					498	30
																																						499	23					499	25
																																						500	50					500	46
[truncated: 22 more columns]

## Sheet: stored for 0 year
1												2												3												4												5
SPECTRUM - MS		SPECTRUM - MS		SPECTRUM - MS		SPECTRUM - MS		SPECTRUM - MS		SPECTRUM - MS		SPECTRUM - MS		SPECTRUM - MS		SPECTRUM - MS		SPECTRUM - MS		SPECTRUM - MS		SPECTRUM - MS		SPECTRUM - MS		SPECTRUM - MS		SPECTRUM - MS		SPECTRUM - MS		SPECTRUM - MS		SPECTRUM - MS		SPECTRUM - MS		SPECTRUM - MS		SPECTRUM - MS		SPECTRUM - MS		SPECTRUM - MS		SPECTRUM - MS		SPECTRUM - MS
dapci-lotus seeds_2012-1.raw		dapci-lotus seeds_2012-1.raw		dapci-lotus seeds_2012-1.raw		dapci-lotus seeds_2012-1.raw		dapci-lotus seeds_2012-1.raw		dapci-lotus seeds_2012-1.raw		dapci-lotus seeds_2012-2.raw		dapci-lotus seeds_2012-2.raw		dapci-lotus seeds_2012-2.raw		dapci-lotus seeds_2012-2.raw		dapci-lotus seeds_2012-2.raw		dapci-lotus seeds_2012-2.raw		dapci-lotus seeds_2012-3.raw		dapci-lotus seeds_2012-3.raw		dapci-lotus seeds_2012-3.raw		dapci-lotus seeds_2012-3.raw		dapci-lotus seeds_2012-3.raw		dapci-lotus seeds_2012-3.raw		dapci-lotus seeds_2012-3.raw		dapci-lotus seeds_2012-3.raw		dapci-lotus seeds_2012-3.raw		dapci-lotus seeds_2012-3.raw		dapci-lotus seeds_2012-3.raw		dapci-lotus seeds_2012-3.raw		dapci-lotus seeds_2012-4.raw
ITMS + c ESI Full ms [65.05-500.00]		ITMS + c ESI Full ms [65.05-500.00]		ITMS + c ESI Full ms [65.05-500.00]		ITMS + c ESI Full ms [65.05-500.00]		ITMS + c ESI Full ms [65.05-500.00]		ITMS + c ESI Full ms [65.05-500.00]		ITMS + c ESI Full ms [65.05-500.00]		ITMS + c ESI Full ms [65.05-500.00]		ITMS + c ESI Full ms [65.05-500.00]		ITMS + c ESI Full ms [65.05-500.00]		ITMS + c ESI Full ms [65.05-500.00]		ITMS + c ESI Full ms [65.05-500.00]		ITMS + c ESI Full ms [65.05-500.00]		ITMS + c ESI Full ms [65.05-500.00]		ITMS + c ESI Full ms [65.05-500.00]		ITMS + c ESI Full ms [65.05-500.00]		ITMS + c ESI Full ms [65.05-500.00]		ITMS + c ESI Full ms [65.05-500.00]		ITMS + c ESI Full ms [65.05-500.00]		ITMS + c ESI Full ms [65.05-500.00]		ITMS + c ESI Full ms [65.05-500.00]		ITMS + c ESI Full ms [65.05-500.00]		ITMS + c ESI Full ms [65.05-500.00]		ITMS + c ESI Full ms [65.05-500.00]		ITMS + c ESI Full ms [65.05-500.00]
Scan #: 690-697		Scan #: 352-356		Scan #: 473-477		Scan #: 690-693		Scan #: 474-479		Scan #: 697-701		Scan #: 564-568		Scan #: 673-675		Scan #: 360-364		Scan #: 272-277		Scan #: 313-315		Scan #: 426-438		Scan #: 636-646		Scan #: 703-709		Scan #: 634-646		Scan #: 553-564		Scan #: 524-529		Scan #: 493-497		Scan #: 524-528		Scan #: 514-521		Scan #: 458-464		Scan #: 634-642		Scan #: 524-528		Scan #: 494-498		Scan #: 450-457
RT: 3.24-3.27		RT: 1.64-1.66		RT: 2.22-2.24		RT: 3.24-3.25		RT: 2.22-2.25		RT: 3.27-3.29		RT: 2.65-2.67		RT: 3.16-3.17		RT: 1.69-1.71		RT: 1.28-1.31		RT: 1.47-1.48		RT: 2.00-2.06		RT: 2.97-3.02		RT: 3.28-3.31		RT: 2.96-3.02		RT: 2.58-2.63		RT: 2.45-2.47		RT: 2.30-2.32		RT: 2.45-2.47		RT: 2.40-2.43		RT: 2.14-2.17		RT: 2.96-3.00		RT: 2.45-2.47		RT: 2.31-2.33		RT: 2.10-2.13
AV: 8		AV: 5		AV: 5		AV: 4		AV: 6		AV: 5		AV: 5		AV: 3		AV: 5		AV: 6		AV: 3		AV: 13		AV: 11		AV: 7		AV: 13		AV: 12		AV: 6		AV: 5		AV: 5		AV: 8		AV: 7		AV: 9		AV: 5		AV: 5		AV: 8
SB: 28 3.38-3.41 , 0.90-0.98		SB: 28 3.38-3.41 , 0.90-0.98		SB: 28 3.38-3.41 , 0.90-0.98		SB: 28 3.38-3.41 , 0.90-0.98		SB: 28 3.38-3.41 , 0.90-0.98		SB: 28 3.38-3.41 , 0.90-0.98														SB: 25 2.80-2.84 , 3.34-3.41		SB: 25 2.80-2.84 , 3.34-3.41		SB: 25 2.80-2.84 , 3.34-3.41		SB: 25 2.80-2.84 , 3.34-3.41		SB: 25 2.80-2.84 , 3.34-3.41		SB: 25 2.80-2.84 , 3.34-3.41		SB: 25 2.80-2.84 , 3.34-3.41		SB: 25 2.80-2.84 , 3.34-3.41		SB: 25 2.80-2.84 , 3.34-3.41		SB: 56 3.34-3.43 , 0.03-0.20		SB: 56 3.34-3.43 , 0.03-0.20		SB: 56 3.34-3.43 , 0.03-0.20		SB: 51 3.27-3.35 , 0.03-0.18
Mass defect: 0.00 @ 1.00, 300.00 @ 1000.00		Mass defect: 0.00 @ 1.00, 300.00 @ 1000.00		Mass defect: 0.00 @ 1.00, 300.00 @ 1000.00		Mass defect: 0.00 @ 1.00, 300.00 @ 1000.00		Mass defect: 0.00 @ 1.00, 300.00 @ 1000.00		Mass defect: 0.00 @ 1.00, 300.00 @ 1000.00		Mass defect: 0.00 @ 1.00, 300.00 @ 1000.00		Mass defect: 0.00 @ 1.00, 300.00 @ 1000.00		Mass defect: 0.00 @ 1.00, 300.00 @ 1000.00		Mass defect: 0.00 @ 1.00, 300.00 @ 1000.00		Mass defect: 0.00 @ 1.00, 300.00 @ 1000.00		Mass defect: 0.00 @ 1.00, 300.00 @ 1000.00		Mass defect: 0.00 @ 1.00, 300.00 @ 1000.00		Mass defect: 0.00 @ 1.00, 300.00 @ 1000.00		Mass defect: 0.00 @ 1.00, 300.00 @ 1000.00		Mass defect: 0.00 @ 1.00, 300.00 @ 1000.00		Mass defect: 0.00 @ 1.00, 300.00 @ 1000.00		Mass defect: 0.00 @ 1.00, 300.00 @ 1000.00		Mass defect: 0.00 @ 1.00, 300.00 @ 1000.00		Mass defect: 0.00 @ 1.00, 300.00 @ 1000.00		Mass defect: 0.00 @ 1.00, 300.00 @ 1000.00		Mass defect: 0.00 @ 1.00, 300.00 @ 1000.00		Mass defect: 0.00 @ 1.00, 300.00 @ 1000.00		Mass defect: 0.00 @ 1.00, 300.00 @ 1000.00		Mass defect: 0.00 @ 1.00, 300.00 @ 1000.00
Data points: 233		Data points: 239		Data points: 237		Data points: 221		Data points: 230		Data points: 240		Data points: 422		Data points: 418		Data points: 418		Data points: 422		Data points: 417		Data points: 429		Data points: 233		Data points: 268		Data points: 234		Data points: 259		Data points: 247		Data points: 217		Data points: 242		Data points: 245		Data points: 222		Data points: 222		Data points: 240		Data points: 219		Data points: 237
Mass	Intensity	Mass	Intensity	Mass	Intensity	Mass	Intensity	Mass	Intensity	Mass	Intensity	Mass	Intensity	Mass	Intensity	Mass	Intensity	Mass	Intensity	Mass	Intensity	Mass	Intensity	Mass	Intensity	Mass	Intensity	Mass	Intensity	Mass	Intensity	Mass	Intensity	Mass	Intensity	Mass	Intensity	Mass	Intensity	Mass	Intensity	Mass	Intensity	Mass	Intensity	Mass	Intensity	Mass	Intensity
70	592	70	669	70	1400	70	584	70	1407	70	985	65	79063	65	81854	65	57679	65	70292	65	54821	65	88751	70	1761	70	1906	70	1632	70	1565	70	1679	70	759	70	1665	70	1148	70	2190	70	1662	70	1575	70	824	70	1162
74	2632	72	131	72	167	72	42	74	7733	72	22	66	15732	66	16384	66	12330	66	18245	66	13912	66	21446	76	45308	72	78	76	42116	76	35419	76	40174	76	57774	76	43466	72	32	74	4208	74	2064	74	1011	72	12	72	235
76	58475	76	48355	74	10871	74	323	76	37486	74	13861	67	3619	67	3671	67	3294	67	4200	67	3401	67	5392	78	20058	74	7587	78	18455	78	16701	78	15818	78	23974	78	16811	74	759	76	39049	76	46378	76	46778	76	59256	74	5170
77	1896	77	2001	76	42252	76	60245	78	11902	76	55642	68	239	68	88	68	91	68	235	68	220	68	232	80	1709	76	34243	80	1480	80	1391	80	1020	80	2014	80	1054	76	36317	78	15453	78	20056	78	17270	77	96	76	45345
78	20683	78	14664	77	229	77	3166	80	1785	77	786	69	1072	69	1356	69	1116	69	1380	69	1043	69	1352	91	51362	78	15546	91	48584	91	64216	82	10	91	43365	82	12	78	16442	80	1322	80	2143	80	1498	78	24487	78	18824
80	2009	80	1605	78	13574	78	22807	91	49953	78	20208	70	2981	70	3425	70	2892	70	3202	70	2817	70	2397	92	2069	80	2280	92	1862	92	2412	91	53737	92	2081	91	51167	80	929	90	396	91	47475	82	12	80	2368	80	1632
91	63485	90	2331	80	2522	80	2121	92	2196	80	1655	71	3652	71	3892	71	2835	71	4286	71	3499	71	5000	96	4398	91	86414	96	4208	96	5720	92	1993	96	5064	92	1785	91	9296	91	48547	92	1770	91	52955	91	44492	91	53377
92	3097	91	55950	91	55653	91	48944	100	65	91	77513	72	349	72	841	72	350	72	552	72	481	72	72	100	227	92	3365	102	7300	100	407	96	5493	100	689	96	5402	92	576	92	2890	96	4362	92	1838	92	2029	92	2925
93	1181	92	2412	92	2285	92	2673	102	10522	92	3417	73	18676	73	19113	73	15021	73	20884	73	16381	73	23520	102	6808	96	6573	104	2910	104	2832	102	1320	102	2348	102	1009	96	5779	96	5305	100	373	96	5395	96	5132	96	4829
96	1547	100	708	100	332	93	2014	104	2132	100	1727	74	29873	74	38284	74	42159	74	35417	74	33387	74	33226	104	3137	100	920	106	1666	106	1794	104	3513	104	4981	104	3709	102	6793	100	204	102	7886	102	785	100	721	102	19338
100	1939	104	3410	102	12232	100	2411	106	1555	102	33489	75	2890	75	3340	75	1539	75	5080	75	1275	75	2640	106	1769	102	14241	108	216848	108	222429	106	2498	106	2319	106	2602	104	3066	102	970	104	3034	104	3738	102	5695	104	3498
102	12608	106	1869	104	2370	102	7186	108	184420	104	4596	76	70881	76	75731	76	81611	76	74217	76	79549	76	64215	108	234703	104	3292	109	7033	109	7231	108	217656	108	271560	108	219280	106	1477	104	3480	106	1741	106	2676	104	5129	106	1713
104	4623	108	235402	106	1605	104	4393	109	6065	106	2445	77	9923	77	11485	77	11259	77	12080	77	12522	77	10991	109	7858	106	1303	110	33038	110	27519	109	6380	109	9893	109	6015	108	181753	106	1960	108	223560	108	221467	106	2601	108	226634
106	1780	109	9112	108	202597	106	2252	110	20822	108	261783	78	17394	78	21399	78	21328	78	19555	78	18311	78	13632	110	34301	108	210963	112	13254	112	13299	110	30363	110	39917	110	30908	109	4583	108	196861	109	7180	109	6394	108	280315	109	6878
108	233137	110	23944	109	7261	108	239042	112	7603	109	10259	79	7243	79	6778	79	7456	79	7363	79	6748	79	6821	112	14634	109	7580	114	130	114	202	112	12634	112	18744	112	13059	110	28022	109	5905	110	35768	110	31620	109	10189	110	26914
109	8409	112	12187	110	26004	109	9670	114	498	110	40113	80	10882	80	11933	80	11093	80	11770	80	11450	80	10757	114	349	110	26014	118	6413	118	6357	114	381	114	800	114	770	112	12267	110	25427	112	13820	112	12682	110	43288	112	11712
110	43548	114	385	112	8631	110	54578	117	5956	112	11473	81	2998	81	2952	81	2636	81	3426	81	2592	81	3694	118	6866	112	11558	124	19605	124	17824	118	6445	118	6792	118	7129	114	621	112	15611	114	217	114	495	112	18613	114	441
112	11403	117	7827	114	715	112	12709	118	5627	114	1957	82	522	82	604	82	253	82	566	82	85	82	601	124	21294	114	219	126	37	132	5494	124	19252	124	18067	124	19854	118	5771	114	292	118	7019	117	240	114	538	118	6524
114	3629	118	7269	117	6630	114	4174	124	16307	117	2075	83	1981	83	2037	83	1666	83	2022	83	1699	83	2490	126	98	118	6419	132	6230	135	239728	132	6594	132	7705	132	6830	124	17756	118	6053	124	22058	118	7365	118	7567	124	20210
117	9212	124	18805	118	6017	117	9521	126	797	118	8448	84	618	84	838	84	499	84	835	84	706	84	820	132	6558	123	853	135	245033	136	13513	135	268264	135	234657	135	262127	132	6656	124	19846	132	6867	124	20783	124	19776	132	6572
118	6758	126	840	124	18976	118	7067	132	4962	124	20031	85	5880	85	5980	85	4950	85	6905	85	5620	85	7277	135	251563	124	20289	136	11915	138	2387	136	16596	136	11101	136	16271	135	235601	126	18	135	266072	132	6832	132	7531	135	265616
123	2152	132	6405	126	1059	123	1406	135	320884	126	725	86	3072	86	3462	86	2926	86	2999	86	2906	86	2808	136	12161	126	145	138	2199	144	1345	138	3358	138	3369	138	3592	136	11608	132	6010	136	12617	135	273579	135	237251	136	15164
124	18692	135	288403	132	5875	124	19949	136	17830	132	7501	87	9523	87	9337	87	7190	87	12015	87	8259	87	12870	138	2709	132	6788	144	2186	146	1265	144	2581	144	2123	144	2644	138	2144	135	270190	138	2568	136	17263	136	10941	138	2434
126	1024	136	21232	135	325909	126	1065	138	1904	135	312307	88	5636	88	6261	88	5647	88	6996	88	5738	88	6172	144	2567	135	290399	146	481	150	357	146	1724	146	1380	146	1913	144	1959	136	14561	144	2549	138	3800	138	3924	144	2221
132	7364	138	2717	136	19074	132	7782	144	1880	136	19714	89	9103	89	9363	89	8270	89	10934	89	8767	89	12147	146	671	136	17423	148	74	152	2029851	150	828	152	2130697	150	1139	146	444	138	2914	146	363	144	3021	144	3303	146	1580
135	363421	144	1852	138	2470	135	341604	146	997	138	3832	91	281576	91	276610	91	285946	91	293086	91	274558	91	262227	150	621	138	2416	150	354	153	115987	152	2089266	153	125689	152	2103183	148	650	144	1581	148	1044	146	1892	146	909	148	2360
136	21478	146	1587	144	2313	136	20181	148	2061	144	3067	92	14110	92	13545	92	13775	92	14003	92	13686	92	12870	152	2194126	144	2249	152	2010554	154	12183	153	117807	154	10999	153	120151	150	151	146	152	150	262	148	1204	148	189	150	3754
138	2910	148	1281	146	1379	138	3276	152	2038346	146	781	93	11027	93	11454	93	11621	93	12949	93	11243	93	9881	153	128086	146	1263	153	115569	156	2782	154	12647	156	3965	154	13148	152	2113057	148	32	152	2192747	150	1124	152	2155650	152	2008313
144	3112	150	981	148	2859	144	3419	153	116631	148	3131	94	15671	94	17236	94	16268	94	17639	94	16244	94	16567	154	12266	148	989	154	11061	158	430	156	2872	158	1947	156	2749	153	124779	152	2130752	153	125141	152	2112874	153	124916	153	116758
146	788	152	2093122	150	750	146	1007	154	13288	150	2156	95	4017	95	5094	95	4314	95	5302	95	4085	95	4841	156	2012	150	1949	156	1682	160	4104	158	1880	160	5271	158	2057	154	11457	153	124904	154	13079	153	120021	154	12164	154	11549
148	1987	153	130303	152	2188729	148	1947	156	1232	152	2025337	96	7294	96	4218	96	5345	96	4710	96	4778	96	6428	158	2990	152	2079116	158	3386	162	6289	160	4840	162	7924	160	5043	156	2165	154	11281	156	1988	154	14297	156	3774	156	3218
150	954	154	14169	153	124386	150	991	158	4785	153	114309	97	10138	97	13173	97	9792	97	14142	97	10433	97	14688	160	5355	153	119935	160	4954	166	2832	162	7391	166	3221	162	7713	158	4142	156	2885	158	3925	156	3138	158	3297	158	7553
152	2074002	156	3580	154	13394	152	2108752	160	3597	154	12316	98	627	98	1749	98	1751	98	1432	98	1767	98	1072	162	7187	154	11738	162	6894	167	7182	166	2637	167	3056	166	2307	160	5152	158	1449	160	5150	158	1893	160	5177	160	5340
153	114820	158	1012	156	1445	153	116127	162	5366	156	4547	99	22636	99	20415	99	16599	99	27531	99	19591	99	31875	166	5400	156	1865	166	5499	168	744	167	10849	168	890	167	9882	162	8964	160	4235	162	9503	160	5110	162	11116	162	10860
154	13244	160	3969	158	5539	154	13842	166	993	158	10134	100	7382	100	8019	100	8457	100	8170	100	7531	100	7091	167	5702	158	4506	167	6871	170	1515	168	1480	170	2960	168	1460	166	2552	162	6300	166	5671	162	10438	166	3518	166	5640
156	3227	162	8434	160	4496	156	4063	167	19838	160	5873	101	21726	101	24624	101	20989	101	24866	101	21298	101	25881	168	1371	160	4628	168	1364	172	5451	170	1633	172	6522	170	1659	167	6606	167	13731	167	7193	166	2752	167	3027	167	12946
158	4573	166	1514	162	4887	158	3638	168	1402	162	6196	102	19218	102	28866	102	58832	102	28474	102	19256	102	15386	170	1556	162	7734	170	1516	174	3867	172	5740	174	4955	172	5993	168	575	168	1155	168	1655	167	10532	168	1302	168	1858
160	4596	167	12679	166	3147	160	4234	170	2132	166	8581	103	5446	103	6438	103	7109	103	6782	103	5469	103	6326	172	6875	166	5234	172	6323	176	2037	174	4724	176	1809	174	4663	170	1229	170	1387	170	1459	168	1787	170	3156	170	2056
162	4745	168	1758	167	17151	162	5857	172	5285	167	14637	104	8608	104	10075	104	8942	104	9456	104	10473	104	7200	174	3825	167	13080	174	3564	178	1460	176	3164	178	1624	176	3104	172	5959	172	5040	172	6799	170	1774	172	6444	172	5881
166	8796	170	3018	168	1240	166	7607	174	2785	168	2398	105	5926	105	5834	105	6117	105	6318	105	5737	105	6418	176	1646	168	2362	176	1707	180	3060	178	1604	180	3684	178	1771	174	3299	174	3117	174	3243	172	6195	174	4446	174	3292
167	16776	172	5464	170	2082	167	13101	176	1886	170	2834	106	4316	106	4376	106	4810	106	4840	106	4879	106	4183	178	1854	170	1557	178	1723	186	8597	180	3649	186	8671	180	3427	176	2068	176	1605	176	2081	174	4329	176	1991	176	2871
168	2354	174	2838	172	6344	168	2469	178	1223	172	7344	107	6786	107	3803	107	2682	107	7800	108	233528	107	4997	180	3034	172	5658	180	2995	188	3607	186	8903	188	4377	186	9628	178	1660	178	1422	178	1894	176	3270	178	2082	178	1823
170	2784	176	1932	174	2934	170	3357	180	2843	174	4474	108	227047	108	240889	108	248072	108	237899	109	14689	108	197164	186	10757	174	4306	186	9874	190	4007	188	3730	190	3992	188	4109	180	3051	180	2568	180	3466	178	1923	180	3705	180	4294
172	6886	178	1241	176	2012	172	6961	186	7549	176	2353	109	16058	109	15739	109	17203	109	16324	110	30199	109	14008	188	3819	176	2867	188	3609	192	1948	190	4598	192	2234	190	4754	182	20	186	7540	186	10221	180	3579	186	9151	182	418
174	3126	180	2883	178	1270	174	4004	188	3446	178	1830	110	30324	110	37854	110	37831	110	32432	111	9722	110	22741	190	4833	178	1095	190	4698	195	123581	192	2035	195	187703	192	1927	186	8888	188	3263	188	3721	182	50	188	4118	184	381
176	1387	182	136	180	3432	176	2026	190	3739	180	4963	111	10233	111	10715	111	10266	111	12436	112	15467	111	11130	192	1918	180	3640	192	1761	196	12648	195	126257	196	19708	195	135812	188	4234	190	4065	190	4814	186	9542	190	4011	186	9815
178	984	186	6610	182	105	178	1016	192	1525	182	336	112	14461	112	15208	112	14068	112	14606	113	8471	112	11653	195	130237	184	448	195	120919	198	1860	196	13773	202	3281	196	14729	190	4602	192	1116	192	1979	188	4369	192	2466	188	3901
180	3776	188	4319	186	8317	180	3401	195	100256	184	700	113	9632	113	9644	113	8181	113	11938	114	6004	113	11727	196	14527	186	8662	196	13889	200	134	198	1917	204	2224	198	1777	192	1709	195	115977	195	130554	190	4708	195	186180	190	4621
182	238	190	3643	188	3590	186	7674	196	11881	186	10558	114	5976	114	6712	114	7315	114	7000	115	17701	114	6417	198	610	188	4074	198	833	202	2742	202	2415	208	353	202	2670	195	106143	196	13892	196	15031	192	2098	196	20291	192	2133
186	7300	192	1447	190	4320	188	4563	198	888	188	4873	115	19679	115	19441	115	15755	115	23672	116	12222	115	24777	200	65	190	4523	200	48	204	2698	204	2629	210	2738	204	2889	196	11788	198	228	198	1204	195	140400	202	3283	195	143689
188	4319	195	180400	192	1722	190	4063	202	2921	190	4925	116	13285	116	14381	116	14962	116	14609	117	43564	116	13986	202	2701	192	2059	202	2569	208	471	206	239	212	105573	206	323	198	927	202	2659	202	2677	196	15200	204	1977	196	15536
190	3744	196	21968	195	119390	192	1663	204	2980	192	3174	117	45922	117	45382	117	43250	117	47026	118	16343	117	46400	204	2723	195	104625	204	2433	210	2415	208	516	213	5754	208	429	202	2826	204	2083	204	1671	198	1764	208	451	198	859
192	1888	198	351	196	13025	195	182969	208	156	195	158560	118	14966	118	16062	118	16910	118	17054	119	10282	118	14360	208	104	196	12777	208	10	211	15075	210	2669	214	1724	210	2873	204	3201	208	552	208	80	202	2673	210	2193	202	3100
195	172877	202	2411	198	864	196	19682	210	1216	196	19143	119	10643	119	11359	119	11526	119	12693	120	5709	119	11800	210	2485	198	320	210	2313	212	58277	211	16074	222	2237	211	18321	206	302	210	1796	210	2173	204	2539	212	115105	204	5496
196	18456	204	1545	202	3216	202	3376	211	4813	198	228	120	4779	120	4728	120	4310	120	4825	121	12954	120	4411	211	15912	200	384	211	12977	213	5021	212	66218	224	2404	212	67096	208	164	211	171	211	10463	206	237	213	6474	205	3597
202	2845	206	50	204	4067	204	2908	212	58757	200	119	121	13904	121	14476	121	10772	121	16777	122	8241	121	18624	212	65297	202	2671	212	63506	214	777	213	4859	226	917	213	5589	210	2169	212	72453	212	71717	208	539	214	1237	206	2244
204	3245	208	628	206	588	208	325	213	3010	202	3949	122	9395	122	8292	122	9152	122	8908	123	9863	122	9018	213	4218	204	4564	213	3815	218	7	214	1113	228	6258	214	1247	212	90094	213	4416	213	3779	210	2755	216	702	208	615
208	690	210	3109	208	231	210	2122	216	11340	204	4419	123	10890	123	10919	123	11168	123	10597	124	25331	123	9620	214	588	206	548	214	454	222	2776	216	147	230	2420	216	570	213	3233	222	1332	216	1329	211	19877	218	325	210	2629
210	1586	211	9761	210	1376	211	15592	222	588	206	598	124	19272	124	24376	124	26547	124	24162	125	9499	124	17710	216	8	208	666	216	74	224	2229	218	837	231	1770	218	1059	214	794	223	702	218	28	212	67352	222	2095	212	78655
211	15325	212	67667	211	5836	212	75960	223	7654	208	811	125	10243	125	11379	125	10479	125	12110	126	2120	125	10931	222	543	210	2079	222	869	226	924	222	848	232	6137	222	134	216	209	224	2857	222	549	213	5528	224	2247	213	4653
212	66658	213	4797	212	64303	213	6336	224	3745	210	1770	126	1562	126	1409	126	2625	126	2570	127	19603	126	1538	223	8264	211	10359	223	7514	228	4879	223	9006	234	29728	223	11006	218	518	226	381	223	8954	214	929	226	747	214	732
213	4556	214	551	213	4036	214	522	226	584	211	17051	127	20657	127	21308	127	18256	127	23355	128	4944	127	22641	224	4049	212	53347	224	3957	230	1851	224	3627	235	688	224	4086	222	1732	228	4147	224	4305	216	1767	228	6014	216	8954
214	282	216	7975	214	469	216	10107	228	4024	212	67404	128	4381	128	4971	128	4205	128	4942	129	12000	128	4545	226	981	213	3168	226	929	231	2364	226	723	236	1693	226	652	223	12734	230	1660	226	801	218	1520	230	2583	218	1113
216	10303	218	1062	216	13643	218	159	229	120	213	6028	129	13351	129	14092	129	10091	129	15012	130	8437	129	16003	228	4623	214	1337	228	4550	232	5332	228	4809	238	1726	228	5146	224	3022	231	2487	228	4697	222	164	231	1546	222	1345
218	614	222	2622	222	629	222	1543	230	1636	214	216	130	9031	130	8050	130	9481	130	9644	131	8319	130	8916	230	2343	216	485	230	2100	233	130	230	2724	240	7540	230	2591	226	699	232	4009	230	2149	223	12313	232	7028	223	913
222	802	224	2010	223	6571	224	1316	231	2334	216	11256	131	8377	131	8599	131	7983	131	10091	132	15567	131	9801	231	1982	218	200	231	2608	234	22695	231	4263	241	700	231	4042	228	4745	233	2098	231	3119	224	4418	233	8317	224	3611
224	1748	226	184	224	3347	228	5632	232	4925	218	668	132	15435	132	17372	132	16233	132	15558	133	19685	132	14063	232	5444	220	693	232	5101	235	169	232	5569	242	3127	232	5572	230	1939	234	22706	232	5281	226	560	234	22612	226	156
226	125	228	5113	226	334	230	2177	234	21459	222	1753	133	19574	133	22307	133	18667	133	21931	135	351460	133	21882	233	1443	222	2582	233	440	236	1601	233	3028	244	6533	233	2808	231	2113	236	1087	233	3041	228	5267	235	628	228	4507
228	5648	229	384	228	4908	231	5520	235	159	224	1323	135	376542	135	366220	135	378960	135	356199	136	51989	134	881	234	24078	224	2831	234	23564	238	1434	234	23841	245	21	234	24992	232	5090	238	1688	234	22046	230	2651	236	1792	229	107
230	1973	230	2529	229	283	232	6278	236	1591	226	882	136	54576	136	54182	136	56152	136	54404	137	12429	135	335488	235	327	226	715	235	259	239	218	235	436	246	1366	235	664	233	1024	239	646	235	419	231	4004	238	1899	230	1982
231	4701	231	4044	230	1946	233	6451	238	1153	228	6497	137	14137	137	14390	137	11989	137	14562	138	10229	136	51918	236	1296	228	4402	236	1214	240	7127	236	1602	247	816	236	1532	234	22986	240	7062	236	1064	232	6002	240	8339	231	1464
232	5825	232	5298	231	2769	234	19472	240	6554	229	46	138	7855	138	9183	138	9573	138	9092	139	25556	137	15686	238	1482	230	2274	238	1497	241	196	238	1860	248	3528	238	1957	235	227	242	2323	238	1763	233	6210	241	404	232	6327
233	5573	233	1174	232	5795	235	813	242	3010	230	2492	139	25072	139	25678	139	23044	139	29957	140	3873	138	8826	239	1291	231	4400	239	1195	242	2963	240	8933	252	1125	240	9673	236	1059	244	5625	239	1059	234	22553	242	3285	233	5629
234	20056	234	22126	233	1574	236	1224	244	4680	231	4717	140	3577	140	4754	140	3911	140	4234	141	7044	139	28465	240	8536	232	5528	240	7927	244	5435	241	154	254	2251	241	137	238	1561	246	1222	240	8813	235	843	244	6784	234	19687
235	527	235	1220	234	21379	238	1982	246	1671	232	5668	141	7716	141	7691	141	7417	141	9314	142	3307	140	4244	241	141	233	680	241	10	245	68	242	3275	256	3700	242	3387	239	720	247	74	242	3314	236	1589	246	1530	235	572
236	1376	236	734	235	201	240	7607	247	200	233	4528	142	2479	142	2753	142	3031	142	3275	143	22396	141	9029	242	3277	234	20901	242	3095	246	1332	244	6948	258	1468	244	6991	240	7650	248	1900	244	5961	238	2152	247	539	236	1868
238	1569	238	1847	236	1691	241	657	248	2208	234	23142	143	20991	143	20742	143	21019	143	25601	144	13141	142	3067	244	5916	235	902	244	5609	247	700	246	2079	260	936	246	2155	242	2276	252	811	246	1821	240	9704	248	3952	238	1976
240	7056	240	5345	238	1252	242	2846	252	364	235	739	144	12595	144	12664	144	12766	144	12611	145	24216	143	22563	246	1449	236	1456	246	1603	248	2791	247	503	262	1883	247	586	244	4922	254	1910	247	797	241	33	250	231	239	258
241	308	242	4072	239	94	244	6534	254	1968	236	2410	145	24844	145	25460	145	22420	145	29144	146	10987	144	12339	247	737	238	1645	247	698	250	107	248	3197	264	599	248	3061	246	1456	256	3068	248	2896	242	3458	252	1019	240	6075
242	2351	244	4408	240	7518	245	105	256	3379	238	1706	146	10633	146	10135	146	10436	146	12502	147	15660	145	28216	248	2540	239	564	248	2418	252	739	249	457	265	38	249	127	247	517	258	1545	252	788	244	7196	254	2166	242	3546
244	5560	246	1688	242	2678	246	1783	258	1588	240	8076	147	15402	147	16058	147	13410	147	16533	148	10291	146	10320	252	725	240	5843	250	47	254	1724	252	1163	266	52383	252	1353	248	1847	260	567	254	2071	246	2229	256	4065	244	5619
246	1651	247	169	244	5288	247	1093	260	844	242	2832	148	10041	148	10410	148	7404	148	12555	149	50415	147	17055	254	2061	242	2474	252	675	256	3797	254	1617	267	9830	254	1778	252	1138	262	1403	256	3447	247	408	258	1500	246	1843
247	664	248	2731	246	1868	248	3239	262	1719	244	6166	149	66483	149	71857	149	97436	149	61370	150	12582	148	8799	256	3482	244	4642	254	1872	258	1812	256	3656	268	7304	256	4015	254	1467	264	464	258	1972	248	3347	260	793	247	1073
248	3266	249	512	247	340	249	3101	263	33	245	88	150	13653	150	15403	150	18323	150	15600	152	2051814	149	63259	258	2023	246	1297	256	3294	260	928	258	2212	269	8599	258	2270	256	3240	265	1037	260	812	252	1360	262	2105	248	2339
249	2478	250	280	248	2994	252	1620	264	307	246	1771	152	1990191	152	2152774	152	2006957	152	2008354	153	140340	150	13627	260	1025	247	729	258	1798	262	1065	260	1006	270	1858	260	1054	258	1919	266	38527	262	1361	254	1729	264	706	250	296
250	7	252	861	252	131	254	2289	265	3075	247	564	153	151974	153	158393	153	150657	153	152658	154	19360	151	3202	262	1497	248	3049	260	957	264	691	262	1290	272	591	261	32	260	955	267	7823	263	12	256	4088	266	56806	252	802
252	1390	254	2311	254	2221	256	3312	266	27215	248	3816	154	20683	154	19747	154	19432	154	23042	155	19962	152	2014711	263	108	249	346	262	1502	265	1567	263	46	273	457	262	1170	262	1752	268	6961	264	667	258	2219	267	10472	254	1832
254	2030	256	3364	256	3192	258	2941	267	5973	249	1179	155	20869	155	20927	155	18492	155	23075	156	14254	153	151008	264	562	250	537	263	186	266	38970	264	616	274	643	264	680	264	764	269	10882	266	43059	260	878	268	7187	256	4616
256	3817	258	2290	258	1266	260	1386	268	6342	250	90	156	13308	156	12546	156	14158	156	12916	157	11710	154	21285	265	1227	252	437	264	573	267	7724	265	3115	276	1907	265	4247	265	1865	270	2271	267	7645	261	127	269	8154	258	1916
258	2502	260	715	260	893	261	1890	269	12236	252	1357	157	11891	157	11820	157	10135	157	14323	158	12660	155	23699	266	39660	254	1226	265	857	268	6759	266	48150	279	56026	266	47176	266	40361	272	286	268	6382	262	1170	270	1826	260	1060
260	1085	261	101	262	1476	262	1379	270	2495	254	2192	158	12309	158	16311	158	26224	158	14967	159	7645	156	12005	267	7028	256	3366	266	38398	269	10176	267	9970	280	13544	267	9647	267	7665	273	434	269	10821	264	705	272	810	262	1478
261	74	262	1531	263	283	264	462	272	573	256	3793	159	7682	159	8138	159	8103	159	9029	160	10795	157	14040	268	6551	258	1548	267	7138	270	2524	268	6915	281	199	268	6817	268	7020	274	335	270	2225	265	4042	273	500	263	126
262	1564	263	141	264	458	265	7001	273	407	258	2048	160	9855	160	10725	160	11428	160	11491	161	13442	158	10513	269	10489	260	1216	268	6107	272	701	269	9383	282	1498	269	9306	269	9692	276	949	272	737	266	47314	274	1015	264	457
263	41	264	889	265	3517	266	47858	274	674	260	1260	161	12676	161	13099	161	11875	161	14413	162	15630	159	8305	270	2081	261	219	269	9722	273	689	270	2107	284	1137	270	2026	270	1997	279	58846	273	127	267	9666	276	2079	265	3377
264	791	265	2232	266	32598	267	10854	276	1126	262	2020	162	13388	162	15466	162	15807	162	16021	163	107700	160	9820	272	435	262	1210	270	1885	274	766	272	1190	286	358	272	1321	271	37	280	8488	274	677	268	6921	279	66783	266	35437
265	6335	266	31180	267	7172	268	6265	279	164270	264	854	163	114014	163	108148	163	94953	163	125781	164	19890	161	14028	273	369	263	458	272	627	276	1304	273	1233	288	4595	273	1012	272	353	281	859	276	1576	269	9199	280	15067	267	6735
266	40226	267	7829	268	7179	269	12623	280	25499	265	5940	164	21375	164	21182	164	19528	164	20904	165	5146	162	14631	274	660	264	651	273	361	279	48251	274	292	289	684	274	91	273	383	282	1162	279	75586	270	2056	281	225	268	6314
267	8823	268	6055	269	13589	270	3366	281	2232	266	41575	165	5403	165	5830	165	5501	165	5089	166	11364	163	133980	276	1413	265	4094	274	615	280	10608	276	1872	290	2870	276	1833	274	799	284	1144	280	14009	272	1393	282	1562	269	9357
268	6881	269	11689	270	2868	272	1158	282	1030	267	8022	166	11545	166	12377	166	14744	166	12701	167	21698	164	21238	279	71393	266	33086	276	1384	281	1236	279	68178	291	1269	279	80864	276	1490	286	2607	281	1662	273	993	285	3508	270	3244
269	12955	270	2062	272	528	273	570	284	897	268	6438	167	28557	167	28519	167	27879	167	25131	168	5304	165	5252	280	12754	267	6594	279	63183	282	1362	280	11934	292	2437	280	14071	279	132203	288	3318	282	1667	274	137	286	1	272	628
270	2927	272	1345	273	451	274	1405	286	334	269	9789	168	6125	168	5337	168	5929	168	6268	169	8999	166	9778	281	1827	268	6483	280	11596	284	1319	281	1499	293	649	281	1796	280	25159	289	497	284	1207	276	1906	288	4482	273	482
272	938	273	888	274	838	276	2123	288	3560	270	2641	169	10607	169	11172	169	10379	169	12655	170	9325	167	22332	282	1631	269	11050	281	1541	286	891	282	2170	294	7224	282	2157	281	2618	290	2126	286	130	279	87230	289	781	274	705
273	596	274	821	276	1536	279	147426	289	460	272	1099	170	9102	170	10362	170	10199	170	10731	171	12342	168	5127	284	1514	270	1914	282	1659	288	3662	284	1675	296	28055	284	1714	282	1772	291	1262	288	3839	280	15270	290	2773	276	1442
274	1170	276	1477	279	232695	280	24682	290	1802	273	557	171	11372	171	12780	171	11405	171	13452	172	14964	169	11170	285	96	272	1325	284	1409	289	672	286	1124	300	787	286	848	283	2111	292	1448	289	652	281	1682	291	1575	279	408651
276	2036	279	84934	280	39947	281	4145	291	1945	274	834	172	13897	172	14687	172	15397	172	14494	173	7898	170	9116	286	365	273	389	286	298	290	1728	288	4119	302	1230	288	4347	284	1172	293	2243	290	1722	282	2092	292	2431	280	71228
279	139254	280	14836	281	4480	282	1854	292	1784	275	135	173	8328	173	8792	173	7665	173	9340	174	9675	171	13238	288	3848	274	1119	288	3675	291	1576	289	656	303	1073	289	857	285	90	294	2390	291	2136	284	1627	293	378	281	9083
280	23418	281	2127	282	1598	284	1666	293	1222	276	2037	174	9249	174	9161	174	10086	174	10608	175	6115	172	12329	289	654	275	478	289	640	292	2104	290	2119	304	11289	290	2264	286	291	295	1756	292	2373	286	549	294	9180	282	2574
281	3089	282	771	284	1157	288	3104	294	4282	279	290415	175	5752	175	6543	175	6758	175	6463	176	6793	173	8776	290	1611	276	1309	290	1533	293	555	291	2045	305	2602	291	2036	288	3574	296	27694	293	1018	288	4553	296	27830	284	1514
282	1593	284	1199	286	546	289	865	296	33971	280	48905	176	6017	176	7093	176	5892	176	6345	177	13641	174	8732	291	1973	279	160830	291	1948	294	3751	292	2063	306	1516	292	2143	289	573	300	132	294	5799	289	831	300	793	286	1109
284	1371	286	127	288	3693	290	2375	298	240	281	5917	177	15301	177	15442	177	13904	177	15582	178	6148	175	6107	292	2338	280	27630	292	2153	296	30102	293	782	307	2246	293	740	290	1955	302	676	295	1328	290	2218	302	1443	288	4531
286	199	288	4165	289	382	291	2594	300	479	282	2386	178	6863	178	6694	178	6554	178	6318	179	5369	176	5589	293	756	281	2683	293	858	298	179	294	5071	308	4522	294	5519	291	1777	303	118	296	27458	291	2129	303	506	289	527
288	3682	289	422	290	2081	292	2544	302	925	284	1606	179	5129	179	5603	179	4998	179	6041	180	8972	177	13405	294	6848	282	1688	294	6175	300	884	295	499	309	764	295	599	292	2376	304	10234	300	485	292	2203	304	12544	290	1960
289	826	290	2324	291	2302	293	1503	303	935	286	78	180	9038	180	10503	180	10274	180	8987	181	8203	178	5770	296	28035	284	1322	296	37861	301	230	296	27772	310	57	296	29923	293	2464	305	1754	302	1722	293	650	305	2748	291	2263
290	2665	291	1913	292	2068	294	4982	304	8088	288	4581	181	7970	181	8327	181	10487	181	9488	182	2944	179	5775	300	348	285	412	300	369	302	1498	300	602	312	235	300	551	294	6149	306	674	303	1604	294	5609	306	1402	292	2960
291	2361	292	1967	293	1595	296	36313	305	1094	289	768	182	2944	182	3712	182	3217	182	3576	183	7801	180	8414	302	1595	286	580	302	1520	303	1294	302	2369	316	1268	302	2571	296	30093	308	4665	304	10080	295	599	307	2030	293	396
292	2196	293	1067	294	4903	298	94	306	825	290	2062	183	7765	183	8068	183	7789	183	9097	184	4868	181	8575	303	1857	288	4477	303	1630	304	8914	303	1513	317	34	303	724	298	103	309	293	305	2145	296	30520	308	4990	294	3678
293	1179	294	4314	296	42265	300	139	307	937	291	2615	184	4971	184	5742	184	5435	184	5878	185	10240	182	3160	304	9852	289	969	304	9316	305	1991	304	10554	318	418	304	11777	300	328	310	209	306	1283	300	549	309	691	295	54131
294	4202	296	24719	300	618	302	1853	308	2952	292	2809	185	11599	185	11359	185	11834	185	12895	186	15930	183	8700	305	2078	290	1739	305	1978	306	931	305	2293	320	339	305	2481	302	1486	316	497	307	1186	302	2617	310	170	300	540
295	768	300	797	302	1076	303	971	309	323	293	842	186	14634	186	16307	186	18162	186	17556	187	9349	184	4914	306	1115	291	1850	306	1141	307	526	306	1645	322	826	306	1746	304	11211	317	47	308	3604	303	688	312	269	301	394
296	33280	301	217	303	1063	304	10290	310	136	294	5393	187	8270	187	10236	187	9584	187	10487	188	9599	185	12285	308	5089	292	1731	308	4683	308	4126	308	5058	324	650	307	11	305	1811	318	128	309	557	304	11902	316	1326	302	619
300	313	302	1097	304	8978	305	1950	312	195	295	714	188	8897	188	10350	188	9545	188	9745	189	4225	186	13364	309	593	293	945	309	534	309	404	309	342	326	101	308	4954	306	1279	320	779	310	207	305	2448	318	558	303	1033
302	1445	303	917	305	1362	306	997	316	175	296	43257	189	4388	189	5554	189	4329	189	5398	190	8292	187	9544	310	72	294	5015	310	81	310	83	310	464	328	258	309	348	307	642	321	74	312	279	306	1694	320	325	304	9527
303	253	304	9920	306	873	307	815	317	81	297	236	190	7298	190	8630	190	8650	190	8767	191	3513	188	7533	312	276	296	33462	312	360	312	510	311	165	330	1683	310	635	308	4240	322	587	315	1452	308	4959	321	169	305	1053
304	10589	305	1654	307	1234	308	4558	318	317	298	732	191	3526	191	3677	191	3697	191	3809	192	5319	189	4931	316	685	298	657	316	545	316	1017	312	469	332	888	312	529	309	211	323	355	316	421	309	265	322	925	306	821
305	1979	306	1202	308	3368	309	194	320	449	300	238	192	5330	192	5888	192	5186	192	5409	193	4695	190	6988	317	198	300	876	317	1554	317	250	316	619	333	385	316	637	310	358	326	75	317	1563	310	720	324	613	307	1485
306	873	307	903	309	346	310	335	321	197	302	1226	193	4996	193	3867	193	4524	193	4932	195	423791	191	3697	318	362	301	698	318	335	318	494	318	454	334	3893	318	443	311	58	330	1229	318	475	312	446	326	92	308	3649
307	794	308	4138	310	242	312	175	322	217	303	445	195	392996	195	410977	195	427633	195	439111	196	48403	192	4405	320	788	302	444	320	667	320	570	319	171	335	772	319	114	312	462	331	76	320	772	316	689	328	144	309	379
308	4294	309	304	312	297	316	1200	324	363	304	10896	196	45272	196	45152	196	48589	196	50631	197	9309	193	4477	321	347	303	1530	321	302	321	136	320	576	336	434	320	518	316	700	332	434	321	190	318	521	330	1951	310	786
309	286	310	240	316	651	317	467	326	201	305	2101	197	10279	197	10067	197	9300	197	11248	198	4657	195	373965	322	651	304	7602	322	590	322	725	321	308	338	280	321	322	318	393	333	168	322	638	319	80	332	1029	312	208
310	270	316	962	317	102	318	425	330	1090	306	1445	198	6338	198	7278	198	5092	198	4779	199	9134	196	42595	324	409	305	1702	324	374	323	54	322	484	340	308	322	425	319	43	334	2950	324	423	320	566	333	439	316	1148
312	122	317	367	318	281	320	817	332	377	307	280	199	9116	199	10139	199	7564	199	10360	200	4555	197	10024	326	338	306	868	326	343	324	406	323	261	342	183	323	293	320	649	335	749	326	314	321	270	334	3873	317	76
316	938	318	447	320	388	321	267	333	51	308	4948	200	4766	200	5265	200	5639	200	5493	201	4939	198	5605	328	67	307	966	328	51	326	152	324	726	343	273	324	690	321	267	336	326	330	1808	322	455	335	669	318	720
317	365	319	3	321	122	322	590	334	2442	309	423	201	5340	201	5718	201	4949	201	5483	202	6582	199	10300	330	1625	308	2690	330	1552	328	234	326	137	344	700	326	148	322	316	338	102	332	593	323	269	336	536	320	1002
318	225	320	507	322	318	323	148	335	271	310	462	202	6630	202	7225	202	7285	202	7459	203	6031	200	4698	332	519	309	433	332	521	330	1409	328	442	345	1813	328	485	323	60	340	45	333	639	324	611	338	115	321	190
319	410	321	267	324	547	324	406	336	391	312	458	203	5575	203	6088	203	5243	203	5718	204	10060	201	5476	333	668	310	258	333	566	332	695	330	1588	346	1513	330	1650	324	584	342	64	334	3187	326	39	340	58	322	997
320	694	322	415	326	267	326	363	338	251	316	780	204	12091	204	13182	204	13836	204	13110	205	13907	202	6271	334	3072	312	622	334	2922	333	125	332	688	348	345	331	8	326	291	344	973	335	491	328	425	342	181	324	492
321	176	324	388	328	108	328	20	342	69	317	489	205	19152	205	22975	205	36214	205	16922	206	5004	203	5464	335	345	316	715	335	408	334	3167	334	4391	350	472	332	550	328	344	345	1729	336	419	330	1686	343	496	326	7
322	478	326	547	330	1276	330	1506	344	1670	318	313	206	6088	206	5276	206	8092	206	5500	207	5821	204	9952	336	561	317	584	336	489	335	566	335	571	353	77	334	4462	330	1465	346	1957	341	200	332	667	344	532	330	908
324	586	328	213	332	693	332	784	345	1416	320	379	207	6008	207	6162	207	6091	207	7741	208	3326	205	16597	338	90	318	254	338	65	336	336	336	327	354	11	335	507	332	332	347	239	342	320	334	4417	345	2287	332	726
326	315	330	1341	333	32	333	236	346	1161	322	684	208	3659	208	3865	208	3266	208	3751	209	4873	206	4964	340	183	320	900	340	195	338	343	337	186	356	1696	336	364	333	125	348	604	344	1400	335	448	346	1174	333	332
328	72	331	210	334	2875	334	3154	348	537	323	10	209	5468	209	5369	209	5336	209	5203	210	5287	207	7570	342	394	321	63	342	323	340	219	338	116	357	9	337	206	334	3095	350	304	345	653	336	344	347	64	334	2980
330	1538	332	900	335	403	335	570	349	77	324	678	210	5671	210	6023	210	6856	210	6041	211	21845	208	3426	344	1473	322	508	344	1537	342	121	340	2	358	83	338	94	335	715	354	61	346	2868	337	124	348	357	335	478
332	664	333	447	336	412	336	17	350	204	326	204	211	20595	211	23739	211	22315	211	16965	212	84069	209	5499	345	3605	324	630	346	3055	343	347	341	264	360	641	341	217	336	288	356	1731	347	155	338	3	349	327	336	381
333	401	334	2532	338	267	337	135	352	277	328	212	212	73669	212	83930	212	87182	212	90011	213	15874	210	4822	347	41	326	292	347	180	344	952	342	319	361	47	342	264	338	160	358	181	348	686	341	178	350	100	338	296
334	2854	335	471	339	56	344	1332	353	11	330	1393	213	14566	213	16337	213	16237	213	16093	214	6098	211	16134	348	589	328	622	348	576	345	1011	344	1401	362	195	344	1314	340	111	360	267	349	112	342	245	352	20	339	166
335	511	336	447	343	434	345	1198	354	1	331	38	214	5721	214	5762	214	5735	214	6342	215	15243	212	69488	350	374	330	975	350	372	346	2035	345	1635	364	206	345	2401	343	281	361	177	350	204	344	1312	353	77	341	263
336	146	340	278	344	1477	346	2404	356	1299	332	776	215	16178	215	16874	215	13922	215	16953	216	12671	213	14355	352	82	331	168	351	23	347	725	346	1449	368	478	346	1334	344	1031	362	72	351	9	345	2401	356	1562	342	242
337	462	342	58	345	1516	347	553	358	260	333	449	216	15099	216	15885	216	14030	216	12946	217	34419	214	6312	354	65	332	564	352	84	348	570	347	339	378	194	347	322	345	1535	364	137	356	2221	346	1289	358	98	344	1255
338	6	344	1094	346	1590	348	440	360	51	334	3255	217	33060	217	34657	217	33790	217	39415	218	8967	215	15822	356	2395	333	274	354	74	349	84	348	721	379	147	348	692	346	1521	366	59	357	10	347	426	360	404	345	1414
340	31	345	1541	348	675	349	46	362	70	335	318	218	9192	218	9516	218	9865	218	10072	219	7825	216	13862	357	97	334	2760	356	2179	350	270	350	531	380	44	350	520	347	176	368	344	358	46	348	732	361	47	346	1521
344	1256	346	1674	351	380	350	355	366	229	336	348	219	7548	219	8559	219	7695	219	10180	220	3903	217	35728	358	57	335	682	357	156	351	259	351	109	381	47	351	97	348	944	370	1213	359	268	350	518	362	83	347	340
345	772	347	258	352	512	351	130	367	2	337	68	220	3902	220	3825	220	4219	220	4177	221	6528	218	8731	359	447	336	361	358	60	352	80	352	275	384	47	352	230	349	36	376	2	361	61	351	40	364	233	348	521
346	2501	348	457	354	40	352	44	368	80	338	530	221	7431	221	7425	221	6304	221	7925	222	6602	219	8495	360	105	338	417	359	451	354	169	354	7	385	955	356	2051	350	154	378	60	364	50	352	196	365	105	350	419
347	557	349	128	356	1464	356	1485	370	74	340	22	222	6954	222	7748	222	7845	222	8433	223	36156	220	4276	361	12	340	164	360	127	356	1905	356	2034	386	14429	358	204	351	169	379	153	366	156	356	2006	366	13	351	63
348	540	350	232	358	181	358	177	376	353	342	49	223	33837	223	37082	223	36530	223	34581	224	12174	221	8028	362	48	342	166	361	59	357	47	358	255	388	24232	359	274	352	89	380	75	368	140	358	199	367	226	352	173
349	110	351	277	360	120	360	252	378	45	344	1255	224	11007	224	11270	224	11335	224	10655	225	7930	222	7738	364	40	343	159	362	49	358	296	359	226	389	4285	360	199	354	116	385	1045	370	184	359	472	376	42	356	1415
350	260	352	287	362	185	364	57	379	240	345	1043	225	8769	225	8723	225	8676	225	9787	226	2954	223	26596	366	126	344	1145	364	31	359	51	360	194	390	2663	361	440	356	1836	386	9426	377	112	360	143	378	195	357	64
351	323	354	170	364	209	366	150	380	68	346	2006	226	3012	226	3475	226	3515	226	3138	227	6561	224	9490	368	230	345	2546	366	136	360	254	361	162	391	5864	362	275	358	287	387	3256	379	40	361	440	379	75	358	78
356	1558	356	1280	366	281	370	437	382	44	347	259	227	6375	227	6628	227	6327	227	6599	228	10761	225	7998	370	151	346	60	368	330	361	77	362	287	392	1447	363	174	360	192	388	13986	380	13	362	275	380	88	362	1
358	71	357	58	368	127	376	28	385	990	348	731	228	11061	228	11373	228	10725	228	9896	229	5579	226	2863	378	371	347	221	370	128	362	153	363	124	393	158	366	421	361	75	389	3767	382	71	363	118	381	16	363	33
359	33	358	181	370	89	377	252	386	6948	349	129	229	6349	229	5682	229	5445	229	6061	230	5353	227	6750	379	141	348	772	378	314	364	218	366	409	394	177	368	423	362	115	390	2520	384	30	366	427	383	116	364	18
360	198	360	367	377	209	378	179	387	1804	350	243	230	4965	230	5340	230	5099	230	5137	231	10096	228	9370	380	129	349	58	379	90	365	1	368	329	397	43	376	141	364	214	391	3550	385	1611	368	140	384	122	366	32
366	66	362	259	378	107	379	317	388	16071	351	122	231	11952	231	12430	231	10907	231	12745	232	10387	229	5572	381	6	350	521	380	85	366	95	369	9	400	311	377	167	365	39	392	698	386	9513	369	142	385	939	368	138
367	196	363	249	379	380	380	298	389	920	352	62	232	10019	232	10267	232	9897	232	9852	233	10693	230	4573	383	29	351	182	381	32	367	87	376	159	402	374	378	133	367	98	393	43	387	300	376	143	386	14551	370	666
369	170	368	120	380	190	382	5	390	2171	354	41	233	11486	233	10985	233	8203	233	8860	234	29679	231	9674	385	1106	352	363	383	24	368	200	377	135	403	71	379	83	368	142	394	163	388	19788	377	99	388	25757	377	31
370	1073	369	299	382	24	383	44	391	689	356	1677	234	29489	234	32610	234	35346	234	34335	235	10221	232	8800	386	9594	354	111	384	4	369	179	378	189	404	426	380	249	370	64	396	14	389	2802	378	130	389	3604	378	126
377	263	376	24	385	737	385	1697	392	33	357	18	235	9669	235	9613	235	10015	235	9588	236	3953	233	8326	387	104	356	2069	385	1332	376	11	379	96	405	1463	382	3	378	130	398	59	390	2983	379	35	390	2248	379	387
378	154	378	55	386	8518	386	15083	394	29	358	226	236	4251	236	4309	236	4555	236	4645	237	4795	234	29265	388	19260	357	241	386	9119	377	46	380	207	406	903	384	281	379	257	400	299	391	2468	380	256	391	6638	380	432
379	201	380	35	387	2289	388	21447	396	59	360	291	237	5267	237	6169	237	4919	237	5370	238	4722	235	9253	389	3050	358	274	387	550	378	100	384	225	407	948	385	1265	380	12	403	818	392	733	382	13	392	1526	382	12
380	252	381	267	388	16146	389	4987	400	102	362	201	238	4791	238	5917	238	4893	238	5395	239	5352	236	3942	390	2748	359	124	388	17829	379	214	385	1100	408	582	386	11627	382	146	404	483	393	111	384	310	393	202	383	71
381	54	382	49	389	1055	390	4226	404	1222	364	234	239	5605	239	6309	239	5414	239	6349	240	10041	237	4742	391	3649	360	202	389	3133	380	104	386	12024	409	358	387	89	384	133	405	471	394	101	385	1100	394	172	385	834
382	30	385	1103	390	2427	391	1806	405	80	365	44	240	9907	240	10516	240	10014	240	9462	241	5024	238	4848	392	1166	361	138	390	2600	385	1824	388	20754	411	50	388	21546	385	722	406	654	397	132	386	11418	396	74	386	10261
385	1555	386	9247	391	1524	392	361	406	1567	369	456	241	4695	241	5656	241	4351	241	5502	242	8252	239	5602	393	153	362	217	391	3539	386	9895	389	2649	414	133	389	3115	386	9867	407	908	402	285	387	352	397	134	387	1329
386	13166	387	895	392	108	403	495	407	175	370	202	242	7667	242	7228	242	7805	242	8568	243	5109	240	7910	396	78	364	120	392	1072	387	2362	390	3831	415	66	390	4061	388	18236	408	499	404	38	388	22472	403	634	388	19727
387	167	388	18132	394	81	404	246	408	816	377	4	243	4559	243	4880	243	4069	243	5222	244	7746	241	4647	402	653	365	17	393	193	388	15259	391	5559	416	425	391	5103	389	3990	410	113	406	1235	389	3157	405	98	389	3196
388	21102	389	4902	396	59	405	42	409	226	378	198	244	7931	244	9124	244	8338	244	7989	245	3612	242	7377	404	527	366	400	396	72	389	2616	392	1322	418	52	392	1230	390	3090	414	295	407	1132	390	4206	406	1177	390	2537
389	3984	390	4439	399	0	406	1005	410	79	379	113	245	4525	245	4370	245	4672	245	4099	246	3152	243	4811	406	853	367	29	400	28	390	2230	394	150	422	13	394	144	391	5561	415	39	408	405	391	3666	407	892	391	6961
390	3848	391	421	400	170	407	252	414	29	380	211	246	3467	246	3434	246	3777	246	3388	247	2819	244	7149	407	470	368	265	402	938	391	3957	396	16	424	139	400	423	392	846	416	68	414	155	392	917	408	1466	392	1471
391	3501	393	38	402	982	408	292	416	107	382	275	247	2957	247	3052	247	3102	247	3593	248	5995	245	4034	408	1195	369	134	404	502	392	769	401	62	426	16	402	697	393	199	418	4	416	188	394	105	414	69	393	203
392	502	394	110	404	7	409	139	418	216	385	1413	248	6457	248	6065	248	5563	248	5711	249	9623	246	2933	411	75	370	153	406	913	393	90	402	824	427	133	404	809	394	69	421	57	422	150	395	53	416	313	394	13
396	47	395	48	405	51	410	9	420	51	386	12768	249	10975	249	10978	249	10005	249	11454	250	2817	247	2767	414	196	376	47	407	1167	394	134	404	1124	429	1916	405	949	396	98	422	5	424	152	400	210	421	7	399	151
400	55	397	30	406	1611	412	111	422	21	388	25166	250	3595	250	3143	250	3055	250	3393	251	3372	248	5119	415	55	377	2	408	397	395	12	405	1091	430	8690	406	908	400	480	424	262	427	144	402	196	424	215	404	772
402	694	398	13	407	38	414	312	423	35	389	4684	251	3474	251	4355	251	3292	251	4265	252	4247	249	8885	416	185	378	151	414	133	396	28	406	1038	431	1106	407	907	402	379	425	147	428	332	404	122	429	1764	405	816
404	34	402	1117	408	1206	415	58	424	120	390	3496	252	3734	252	3074	252	3844	252	3916	253	3043	250	2897	417	3	379	195	415	69	400	206	407	916	432	272	408	662	404	541	428	768	429	2256	405	1919	430	9206	406	522
405	401	405	320	409	152	416	155	425	132	391	5879	253	2655	253	3446	253	3020	253	3392	254	4991	251	4043	418	282	380	88	416	166	403	338	408	496	434	407	409	432	405	1761	429	3968	430	9482	406	1004	431	1053	408	1570
406	801	406	736	413	98	418	126	426	31	392	1032	254	4210	254	4316	254	4526	254	4691	255	5784	252	3410	422	125	381	203	418	252	404	645	409	188	435	33	412	1	406	641	430	7263	431	820	407	747	432	185	413	56
408	1155	407	967	414	308	420	202	428	1475	393	160	255	5387	255	6004	255	4713	255	6162	256	8293	253	3143	424	358	382	46	420	3	405	760	410	194	436	194	414	159	407	618	431	845	432	28	408	734	434	435	414	420
409	100	408	251	416	196	423	176	429	1129	394	99	256	7627	256	7632	256	7221	256	8039	257	3537	254	3955	425	72	385	321	422	143	406	1004	412	5	438	14	415	247	408	632	432	254	433	212	409	432	435	54	416	367
412	65	414	6	418	208	424	5	430	11535	402	275	257	3551	257	3656	257	3575	257	3926	258	4559	255	5258	428	842	386	8856	424	368	407	235	414	193	439	11	416	416	409	5	435	135	434	110	414	137	436	183	417	64
414	311	415	10	420	105	428	982	431	1308	404	113	258	3589	258	4078	258	4399	258	4411	259	3055	256	7201	429	2115	387	4038	425	27	408	1001	415	236	444	184	418	417	410	1	436	100	436	96	415	154	437	96	418	259
416	165	416	216	422	34	429	2281	432	380	405	1671	259	3457	259	3295	259	2804	259	3504	260	2716	257	3798	430	9832	388	11486	427	65	410	65	416	407	451	20	421	114	413	45	437	41	437	34	416	361	440	429	420	99
419	357	417	12	423	108	430	9034	434	106	406	948	260	2676	260	2709	260	2761	260	2386	261	1577	258	3329	431	1145	389	2233	428	812	414	107	418	463	456	66	422	20	414	34	438	165	441	0	418	286	444	215	421	85
420	211	418	381	424	42	431	1340	435	166	407	674	261	1977	261	1606	261	1480	261	1911	262	3815	259	3288	432	34	390	2259	429	1944	415	83	421	95	458	114	424	200	416	352	444	463	444	950	421	111	455	41	422	29
422	117	420	241	425	149	434	126	436	160	408	1254	262	2962	262	3153	262	3765	262	2608	263	2316	260	2340	433	223	391	3200	430	8774	416	124	422	16	460	2087	425	58	417	16	452	98	452	134	423	2	458	136	424	6
424	281	422	26	426	19	435	194	439	150	409	190	263	1979	263	2464	263	2294	263	2067	264	1610	261	1965	434	18	392	900	431	967	417	4	423	10	461	1424	426	28	418	545	458	267	456	107	424	50	459	153	426	96
425	20	424	382	428	2140	436	38	440	10	414	517	264	1748	264	1640	264	1611	264	2088	265	7189	262	2306	436	60	393	65	433	254	418	344	424	245	462	57617	427	141	419	42	459	879	457	37	426	3	460	2235	427	286
426	49	425	144	429	1056	439	76	443	74	415	93	266	44732	266	46408	266	46946	265	3852	266	31564	263	2091	437	21	394	134	434	26	420	34	425	74	463	24517	428	1578	422	29	460	1238	460	1095	428	1499	461	1754	429	12761
429	2433	426	74	430	13510	453	145	444	310	416	394	267	10655	267	11243	267	13035	266	39633	267	10039	264	1401	439	4	395	149	436	62	422	100	426	50	464	16175	429	9892	423	19	461	7548	461	1199	429	9733	462	57997	431	2355
430	9051	427	69	431	1971	458	204	454	11	417	420	268	10603	268	10254	268	8864	267	11604	268	10309	265	3318	442	8	397	9	437	49	424	65	427	29	465	5100	430	1057	425	143	462	39822	462	49102	430	1057	463	24037	432	193
431	1308	428	1413	435	226	460	568	457	35	418	240	269	15568	269	14800	269	15530	268	10671	269	15881	266	30942	444	738	398	64	439	23	425	76	428	1085	466	2325	431	775	426	125	463	16728	463	18746	431	744	464	15794	433	98
432	62	429	2796	436	253	461	2805	458	135	419	445	270	5258	270	6084	270	5445	269	15198	270	5579	267	9370	452	46	400	149	442	3	426	86	429	1140	467	30	432	563	427	23	464	13245	464	13416	432	412	465	5541	435	175
434	138	430	7187	437	41	462	56120	460	1920	420	19	271	6444	271	6731	271	4667	270	5794	271	5525	268	9201	457	180	401	31	444	1041	427	157	430	10186	472	35	433	77	428	538	465	3479	465	4037	433	45	466	2371	436	94
435	172	431	1286	439	146	463	20454	462	43008	422	43	272	4982	272	6360	272	5035	271	8298	272	5864	269	19928	459	127	402	567	452	38	428	1345	431	820	474	191	435	161	429	2516	466	1624	466	1441	435	123	467	109	437	26
436	93	432	204	442	166	464	15836	463	17326	424	50	273	3718	273	3224	273	2873	272	4985	273	2755	270	5691	460	885	404	961	457	17	429	8609	432	613	478	405	437	219	430	10760	467	120	467	393	437	115	469	49	438	279
437	18	434	175	444	412	465	4995	464	11721	426	11	274	1934	274	1844	274	1486	273	3676	274	2161	271	8295	461	798	406	1687	459	103	430	135	433	79	479	294	438	142	431	1990	468	37	471	104	438	80	471	29	441	48
439	166	436	145	452	40	466	1565	465	3271	428	899	275	1481	275	1487	275	1065	274	2235	275	1031	272	5004	462	51702	407	277	460	1107	431	1450	435	151	480	552	439	34	432	9	472	5	473	24	439	41	472	6	443	47
442	47	437	111	454	19	467	289	466	1316	429	3520	276	2556	276	2679	276	3080	275	1858	276	2742	273	2859	463	18888	408	940	461	191	432	146	437	262	481	48	441	147	434	124	473	8	474	79	441	37	473	20	454	111
444	41	443	92	458	201	469	44	467	181	430	9804	277	1966	277	2319	277	1850	276	2147	277	1853	274	1734	464	14562	409	61	462	47984	436	108	438	128	483	3	442	46	436	196	475	123	475	33	444	197	474	47	457	226
451	9	456	142	459	139	476	350	469	26	431	2135	279	539198	279	623221	279	954214	277	2356	279	424382	275	1399	465	4121	410	3	463	17638	437	41	439	81	484	17	444	344	437	126	476	249	476	2	452	48	478	634	458	105
452	31	458	17	460	1851	478	526	471	10	432	154	280	94292	280	111083	280	165344	279	496589	280	74175	276	2299	466	1688	411	88	464	13261	438	74	441	128	487	117	452	25	438	279	478	516	478	675	455	77	479	270	459	218
454	14	459	155	462	45702	479	173	472	40	433	12	281	14484	281	16660	281	21848	280	86882	281	12175	277	2152	467	278	414	595	465	3876	439	134	443	106	488	272	455	99	443	121	479	541	479	203	458	181	480	494	460	3253
459	197	460	1408	463	19468	480	805	473	24	435	55	282	3775	282	4334	282	4285	281	12959	282	3235	279	405899	468	110	415	265	466	1526	440	5	444	290	489	763	458	214	453	8	480	442	480	590	459	876	481	120	462	48163
460	538	462	54698	464	12191	481	179	474	152	436	289	283	2531	283	2730	283	2279	282	3763	283	2375	280	71780	471	37	416	49	467	252	441	149	454	14	490	191	460	3173	456	26	481	213	481	271	460	2048	483	23	463	19171
461	2649	463	23571	465	3447	482	86	476	250	438	3	284	2736	284	3610	284	3862	283	2502	284	3629	281	11216	472	28	417	77	468	117	442	53	455	48	491	68	461	640	457	211	484	9	482	203	461	970	484	148	464	12358
462	52601	464	15051	466	1354	483	19	478	546	439	77	285	4195	285	4824	285	3249	284	3660	285	3606	282	3293	473	58	418	265	471	35	443	42	458	172	492	72	462	58694	459	144	485	102	483	126	462	59745	488	124	465	3943
463	19534	465	4048	467	224	488	62	479	293	442	80	286	3511	286	2823	286	2964	285	4641	286	3295	283	2594	474	28	421	223	472	66	444	60	460	3502	494	6	463	23320	460	2446	488	26	484	1	463	24039	489	587	466	1730
464	13707	466	1442	468	22	489	1250	480	139	457	15	287	4665	287	6381	287	5216	286	3336	287	5172	284	3023	475	102	422	262	473	49	452	27	461	1406	496	49	464	15441	462	46220	489	574	487	58	464	15719	490	459	467	145
465	4397	467	151	471	37	490	159	481	94	459	335	288	8186	288	7046	288	8464	287	6295	288	9087	285	5507	478	712	424	435	474	92	453	26	462	53987			465	4394	463	18594	490	536	489	1214	465	4566	491	124	469	24
466	1603	468	93	473	22	493	45	482	74	460	3410	289	3488	289	3348	289	3095	288	8606	289	3316	286	2904	479	196	426	342	475	202	454	43	463	21733			466	2363	464	12469	493	48	490	190	466	2299	493	11	470	109
467	194	472	52	474	192	494	45	484	152	461	406	290	3095	290	3329	290	3669	289	3235	290	2986	287	5241	480	644	427	301	478	782	455	118	464	14760			467	499	465	3268	494	60	491	20	467	536			472	63
470	5	473	114	476	162	500	13	487	8	462	49712	291	4327	291	4613	291	4432	290	3430	291	3474	288	7679	481	329	429	12958	479	254	456	135	465	4091			468	331	466	1385	496	47	493	24	468	367			473	42
474	6	474	224	478	613			488	388	463	20668	292	3488	292	3872	292	3387	291	4119	292	2988	289	3216	482	147	430	835	480	581	457	45	466	2142			469	10	467	322	497	12	497	69	471	64			475	94
478	519	476	411	479	240			489	448	464	13578	293	4278	293	2619	293	4882	292	2841	293	3309	290	2818	483	115	431	1907	481	281	459	251	467	420			472	130	468	167					473	10			478	734
479	161	477	30	480	218			490	225	465	4382	294	4716	294	9015	294	11401	293	2964	294	3997	291	3627	484	109	432	252	482	151	460	2631	468	289			473	78	471	54					474	334			479	380
480	410	478	565	481	98			491	375	466	1871	296	41241	296	46194	296	69412	294	5529	296	37632	292	2559	486	19	434	164	483	122	461	2003	470	36			474	395	473	43					476	168			480	564
481	19	479	191	482	112			494	5	467	114	297	10422	297	10978	297	13456	295	7501	297	9508	293	2451	487	11	435	154	484	117	462	44986	472	97			476	410	474	228					478	918			481	336
482	32	480	511	483	13			495	44	468	127	298	3732	298	5135	298	4325	296	33379	298	3501	294	6014	489	1166	436	99	486	20	463	17422	473	207			478	913	476	299					479	222			482	85
488	78	482	136	484	160			496	45	474	230	299	3182	299	3583	299	2499	297	11291	299	3688	296	29845	490	146	437	177	487	8	464	12751	474	456			479	300	478	781					480	144			484	227
489	1098	483	54	486	31			498	95	476	196	300	2374	300	3356	300	2035	298	4451	300	2564	297	10474	491	7	439	14	489	1030	465	4042	476	506			480	183	479	321					481	300			486	46
490	131	484	30	488	587			499	69	478	571	301	1357	301	1193	301	1679	299	3875	301	1685	298	4173	492	20	441	352	490	125	466	1458	478	930			481	309	480	402					482	196			488	200
491	54	486	14	489	666					479	482	302	3471	302	3058	302	2609	300	2891	302	2515	299	3834	493	31	442	66	492	21	467	133	479	348			482	227	481	337					484	285			489	736
493	11	488	328	490	523					481	96	303	2640	303	3517	303	1898	301	1822	303	3358	300	2923	497	39	451	3	493	29	469	79	480	276			484	329	483	32					485	55			490	532
500	30	489	489	491	33					482	282	304	11811	304	13370	304	13264	302	2929	304	12092	301	1531	500	22	452	117	497	68	470	21	481	235			485	63	484	87					488	447			491	107
		490	133	494	43					486	6	305	3330	305	3576	305	3379	303	2983	305	3125	302	2869			454	23	500	19	471	46	482	256			486	127	485	182					489	605			492	128
		491	175	496	8					487	57	306	1802	306	1926	306	1485	304	12103	306	2087	303	2706			455	45			472	19	484	341			487	21	486	115					490	54			494	31
		496	74	498	9					488	374	307	106	307	1990	307	2010	305	3242	307	1520	304	9981			458	150			473	61	485	30			488	420	487	52					491	90			496	5
		497	45	499	157					489	1145	308	6261	308	3856	308	4948	306	1836	308	3726	305	2774			459	256			474	196	486	184			489	598	488	26					492	24			500	38
		498	36							490	505	309	1197	309	1818	309	1064	307	1998	309	1198	306	1488			460	3513			475	68	487	7			490	15	489	687					497	37
		499	36							491	262	310	1142	310	1085	310	754	308	4040	310	1019	307	1305			461	61			476	450	488	386			491	69	490	391					498	24
										494	9	311	1085	311	925	311	1172	309	1385	311	843	308	3135			462	42278			477	240	489	563			492	65	491	215					500	57
												312	854	312	1966	312	1064	310	829	312	1330	309	1240			463	15440			478	912	490	37			497	100	492	31
												313	1745	313	2220	313	1124	311	813	313	1504	310	846			464	12764			479	424	491	81			500	57	494	10
												314	2189	314	2386	314	1781	312	1973	314	2274	311	893			465	3452			480	607	492	88					496	65
												315	1154	315	1657	315	1571	313	885	315	1175	312	1447			466	1700			481	165	495	10					497	53
												316	2776	316	2900	316	2071	314	2603	316	2468	313	1751			467	100			482	174	497	56					498	42
												317	1781	317	1750	317	1316	315	1662	317	1582	314	1963			468	35			483	25	498	79
												318	949	318	1151	318	803	316	3511	318	1084	315	1736			469	40			484	205	500	72
												319	653	319	1052	319	627	317	1647	319	494	316	2018			471	78			485	45
												320	859	320	970	320	743	318	997	320	912	317	1328			472	3			486	154
												321	703	322	1370	321	1058	319	428	321	928	318	987			473	93			487	128
												322	1008	324	1003	322	881	320	982	322	894	319	508			474	435			489	727
												323	798	325	717	323	531	321	746	323	591	320	936			475	134			490	125
												324	830	326	933	324	450	322	1075	324	857	321	738			476	364			491	88
												325	735	327	1478	325	221	323	566	325	320	322	639			478	1083			492	86
												327	1515	328	932	326	1024	324	903	326	468	323	511			479	687			493	122
												328	960	329	1455	327	1146	325	623	327	1461	324	656			480	354			494	72
												329	1200	330	2798	328	783	326	832	328	1567	325	491			481	219			497	39
												330	2718	331	1065	329	752	327	1555	329	834	326	868			482	240			498	113
												331	1424	332	1759	330	2471	328	1415	330	3003	327	1486			483	33			500	54
												332	1238	333	1236	331	739	329	1266	331	977	328	1224			484	160
												333	663	334	3257	332	1961	330	3026	332	2283	329	1328			486	262
												334	2481	335	1209	333	830	331	1418	333	876	330	2157			488	767
												335	1607	336	680	334	2854	332	1870	334	2624	331	1540			490	579
												336	635	337	465	335	1401	333	690	335	998	332	1573			491	82
												337	316	338	648	336	719	334	3428	336	678	333	705			492	42
												338	530	339	638	337	293	335	1145	337	595	334	2335			496	90
												339	223	340	388	338	630	336	537	338	393	335	1227			498	72
												340	573	342	1067	339	113	337	464	339	721	336	659			500	6
												341	436	343	2304	340	397	338	475	341	400	337	343
												342	799	344	1673	341	647	339	558	342	482	338	420
												343	265	345	2897	342	344	340	396	343	456	339	409
												344	1773	346	911	343	1325	341	613	344	1415	340	489
												345	1368	347	1070	344	1205	342	593	345	3315	341	516
												346	2396	348	1175	345	3365	343	786	346	788	342	594
												347	503	349	163	347	791	344	1825	347	858	343	765
												348	1230	350	935	348	1211	345	2747	348	1114	344	1636
												349	315	351	670	349	257	346	759	349	369	345	2845
												350	693	352	1143	350	571	347	610	350	326	346	1142
												351	421	353	467	351	674	348	1076	351	509	347	639
												352	735	354	378	352	895	349	330	352	837	348	895
												353	345	355	934	353	103	350	698	353	330	349	429
												354	451	356	2831	354	257	351	765	354	431	350	456
												355	1177	357	1063	355	278	352	565	355	323	351	585
												356	2183	358	796	356	2259	353	455	356	3408	352	562
												357	866	359	559	357	1198	354	309	357	927	353	330
												358	802	360	559	358	408	355	782	358	524	354	409
												359	367	361	214	359	400	356	2847	359	158	355	522
												360	530	362	713	360	241	357	1074	360	416	356	2646
												361	435	363	578	361	241	358	624	361	196	357	992
												362	608	364	340	362	443	359	440	362	360	358	626
												363	528	366	746	363	266	360	380	363	292	359	431
												364	311	367	635	364	323	361	302	364	534	360	387
												365	284	369	2075	365	86	362	301	365	193	361	443
												366	312	370	2526	366	388	363	556	366	294	362	446
												367	281	371	30108	368	439	364	288	367	344	363	434
												368	462	372	11549	369	1770	365	187	368	335	364	195
												369	1721	373	8146	370	932	366	331	369	1118	365	339
												370	514	374	2943	371	22068	367	493	370	1879	366	292
												371	33571	375	1120	372	9249	368	499	371	25035	367	210
												372	11424	376	565	373	5858	369	1895	372	10908	368	277
												373	8145	377	230	374	2261	371	35042	373	6419	369	1507
												374	2510	378	474	375	780	372	12134	374	2257	370	760
												375	1145	379	493	376	298	373	8794	375	688	371	35485
												376	533	380	22	377	267	374	2640	376	458	372	13822
												377	521	381	102	378	132	375	1074	377	200	373	8949
												378	327	382	326	379	1185	376	365	378	267	374	2894
												379	551	383	425	381	538	377	234	379	443	375	1065
												380	309	384	492	382	208	378	278	380	115	376	395
												381	160	385	673	383	281	379	548	381	99	377	333
												382	15	386	11433	384	182	380	137	382	185	378	267
												383	426	387	4592	385	1581	381	173	383	367	379	304
												384	363	388	30252	386	11173	382	303	384	352	380	241
												385	1918	389	9441	387	3713	383	180	385	1693	381	250
												386	10209	390	8387	388	29739	384	285	386	9438	382	133
												387	2074	391	21121	389	9623	385	1546	387	4287	384	827
												388	29869	392	4677	390	7582	386	10077	388	30571	385	667
												389	10913	393	1203	391	19321	387	5864	389	10246	386	8384
												390	7290	394	222	392	4867	388	26827	390	7968	387	3521
												391	20775	395	152	393	951	389	11455	391	18935	388	26784
												392	5170	396	140	394	281	390	7674	392	4929	389	9608
												393	880	397	187	396	164	391	21231	393	939	390	6221
												394	65	398	964	397	124	392	4941	395	154	391	17248
												395	205	399	436	398	484	393	1067	397	365	392	4211
												396	168	400	730	400	311	394	212	398	76	393	762
												397	291	401	154	401	239	396	252	399	150	394	177
												398	295	402	1714	402	576	398	365	400	675	395	259
												399	203	403	1880	403	1790	400	707	401	486	396	42
												400	364	404	2911	404	776	401	727	402	1929	397	360
												401	295	405	2208	405	1689	402	1551	404	2576	398	364
												402	1089	406	1835	406	727	403	1057	405	655	399	114
												403	2008	407	861	407	1151	404	1717	406	2323	400	404
												404	1985	408	1339	408	1212	405	2009	407	336	401	471
												405	2056	409	212	409	204	406	1657	408	1657	402	895
												406	1135	410	321	410	92	407	810	409	432	403	2280
												407	1434	411	352	411	449	408	1345	410	135	404	1876
												409	301	412	262	413	418	409	489	412	588	405	1550
												410	127	413	344	414	533	410	143	413	52	406	1321
												411	81	414	1009	415	319	411	308	414	843	407	1238
												412	552	415	469	416	483	413	488	415	412	408	1039
												413	407	416	698	418	279	414	612	416	466	409	212
												414	497	417	504	419	1652	415	250	417	237	410	158
												415	391	418	1114	420	829	416	433	418	987	411	542
												416	569	419	2642	421	213	417	347	419	2456	412	6
												417	301	420	1062	422	114	418	817	420	793	413	772
												418	585	421	383	423	100	419	2743	421	300	414	500
												419	2402	422	217	424	189	420	760	422	78	415	294
												420	622	424	579	425	141	421	386	423	137	416	250
												421	381	425	436	426	263	422	67	425	585	417	355
												422	101	426	668	427	247	423	116	427	679	418	662
												423	324	428	1668	428	2691	424	436	429	2223	419	2114
												425	436	429	14540	429	9986	425	308	430	7667	420	724
												426	305	430	184	430	4395	426	231	431	1503	421	331
												427	558	431	2499	431	2678	427	568	432	355	422	228
												428	1618	432	857	432	150	428	227	433	262	424	610
												430	13486	433	343	433	387	429	3299	434	255	425	345
												431	1538	434	333	434	293	430	8924	435	324	426	316
												432	274	435	48	435	300	431	1887	436	40	427	519
												433	163	436	556	436	630	432	407	437	222	428	867
												434	202	437	277	438	174	433	200	438	279	429	9330
												435	329	438	164	439	383	434	168	439	205	430	3378
												436	240	440	709	440	98	435	123	440	495	431	1041
												437	170	441	444	442	83	436	260	441	471	432	426
												438	122	442	754	443	230	437	155	442	366	433	326
												439	521	443	616	444	486	438	336	443	144	434	129
												440	383	444	606	445	15569	439	266	444	571	435	194
												441	497	445	25158	446	7291	441	488	445	19145	436	309
												442	294	446	10366	447	5069	442	184	446	8982	437	60
												443	330	447	7123	448	1849	443	118	447	6739	438	218
												444	1233	448	2485	449	612	444	568	448	2585	439	136
												445	22754	449	1285	450	200	445	28092	449	876	440	435
												446	10367	450	252	451	46	446	12140	450	573	441	718
												447	6784	451	155	452	253	447	8815	451	235	443	646
												448	2617	452	110	454	94	448	3096	452	39	444	489
												449	809	454	510	455	136	449	1151	453	64	445	30358
												450	263	455	166	456	99	450	275	454	26	446	13438
												451	63	456	97	457	345	451	161	455	72	447	9320
												452	241	457	332	458	222	452	43	456	245	448	3146
												454	339	458	318	459	773	453	108	457	187	449	1097
												455	221	459	836	460	2814	454	171	458	30	450	302
												456	117	460	2110	461	2656	455	125	459	532	451	232
												457	225	461	5672	462	63889	456	76	460	788	452	132
												459	694	462	72359	463	26905	457	325	461	6966	453	266
												460	3449	463	27983	464	17613	458	214	462	67454	454	43
												461	5426	464	20887	465	5511	460	3626	463	27971	455	143
												462	58294	465	8034	466	2137	461	2508	464	20123	456	115
												463	27311	466	2699	467	638	462	71712	465	6898	457	295
												464	18297	467	698	468	218	463	29619	466	2554	458	294
												465	5818	468	325	469	79	464	20707	467	522	459	428
												466	2185	469	155	470	154	465	6192	468	252	460	674
												467	521	470	231	471	69	466	2067	469	56	461	3617
												468	355	471	182	472	56	467	925	471	81	462	60227
												469	63	472	245	473	20	468	154	472	96	463	25012
												470	157	473	137	474	174	469	88	473	203	464	17648
												471	50	474	613	475	104	471	141	474	222	465	5534
												472	170	475	132	476	280	472	73	476	849	466	2020
												473	78	476	750	477	327	473	81	477	993	467	581
												474	411	477	298	478	897	474	397	478	745	468	365
												475	114	478	960	479	339	475	149	479	495	469	133
												476	277	479	1144	480	726	476	593	480	455	470	236
												477	543	480	446	481	328	477	487	481	191	471	70
												478	933	481	332	482	249	478	852	482	86	472	109
												479	1320	482	347	483	188	479	243	484	192	473	58
												480	530	483	137	484	104	480	830	485	84	474	278
												481	282	484	380	485	80	481	323	486	167	475	347
												482	190	485	300	486	70	482	118	487	73	476	251
												483	292	486	233	488	670	483	29	488	203	477	509
												484	239	487	327	489	911	484	244	489	432	478	744
												485	169	488	133	490	627	485	154	490	505	479	549
												486	143	489	1064	491	21	487	221	491	143	480	751
												487	66	490	945	492	169	488	365	492	194	481	393
												488	221	492	309	493	103	489	996	493	33	482	319
												489	1355	493	130	494	72	490	389	494	38	483	68
												490	141	494	155	495	59	491	148	495	47	484	320
												491	80	495	92	496	105	492	84	496	104	485	133
												492	274	496	140	497	98	493	58	497	97	486	84
												493	186	497	118	498	128	494	99	498	105	487	47
												494	109	498	104	499	32	495	78	499	66	488	308
												495	116	500	112	500	41	496	78			489	237
												496	177					497	77			490	362
												497	126					498	102			491	203
												498	170					499	40			492	104
												500	195					500	53			493	76
																						494	100
																						495	49
																						496	209
																						497	61
																						498	116
																						499	70
																						500	63
[truncated: 22 more columns]
